# Supplementary material for: BF3·Et2O catalyzed transannulation of pyridotriazoles with isothiocyanates: synthesis of thiazolo[3,4-a]pyridin-3-imines
Source: Royal Society of Chemistry journal article supplement (doi:10.1039/d1nj04033b), 2021-01-01
Supplement: d1nj04033b1.pdf [file d1nj04033b1.pdf]

# **BF<sub>3</sub>·Et<sub>2</sub>O Catalysed Transannulation Reaction of Pyridotriazoles with Isothiocyanate Synthesis of Thiazolo[3,4-a] pyridin-3-imine**

Rahul Kumar<sup>a</sup>, Vaibhavkumar Ginoya<sup>a</sup>, Rashmi Semwal<sup>a</sup> and Subbarayappa Adimurthy<sup>\*a</sup>

Academy of Scientific & Innovative Research, Ghaziabad, CSIR–Central Salt & Marine Chemicals Research Institute, G.B. Marg, Bhavnagar-364 002. Gujarat (INDIA).

\* E-mail: [adimurthy@csmcri.org](mailto:adimurthy@csmcri.org)

## **Table of Content**

| <b>S.No</b> | <b>Content</b>                                                | <b>Page number</b> |
|-------------|---------------------------------------------------------------|--------------------|
| 1           | Experimental Section                                          | S1                 |
| 2           | Characterisation Data                                         | S2-S10             |
| 3           | References                                                    | S10                |
| 4           | <sup>1</sup> H & <sup>13</sup> C- NMR Spectra of all products | S11-S40            |
| 5           | Copy of HRMS spectra of compounds                             | S41-52             |

## **Experimental section**

### **General information**

All commercially available chemicals and reagents were used without any further purification unless otherwise indicated. <sup>1</sup>H and <sup>13</sup>C NMR spectra were recorded at 500, 600 and 150, 125 MHz respectively. The spectra were recorded in deuterated chloroform (CDCl<sub>3</sub>) and DMSO-d<sub>6</sub> as solvent. Multiplicity was indicated as follows: singlet (s); doublet (d); triplet (t); multiplet (m); doublet of doublets (dd) etc. and coupling constants (J) were given in Hz. Chemical shifts are reported in ppm relative to TMS as an internal standard. The peaks around delta values of <sup>1</sup>H NMR (7.26), and <sup>13</sup>C NMR (77.15) are correspond to deuterated solvent chloroform <sup>1</sup>H NMR (2.50) and <sup>13</sup>C NMR (39.43) are correspond to deuterated solvent DMSO respectively. Mass spectra were obtained using electron impact (EI) ionization method. Progress of the reactions was monitored by thin layer chromatography (TLC). All products were purified through column chromatography using silica gel 100-200 mesh size using hexane/ethyl acetate as eluent unless otherwise indicated.

## Experimental procedure for the synthesis of ethyl (Z)-3-(phenylimino)-3H-thiazolo[3,4-a]pyridine-1-carboxylate

To a reaction tube equipped with a magnetic stir bar, added ethyl [1,2,3]thiazolo[1,5-a]pyridine-3-carboxylate **11** (38.2 mg, 0.2 mmol), phenyl isothiocyanate **2a** (29.7 mg, 0.22 mmol), and BF<sub>3</sub>·Et<sub>2</sub>O 25% mol% with combination of DCB (0.5mL)/DCE (0.5mL) in 24h. The mixture was heated in an oil bath at 120 °C in a closed tube. Reaction was monitored by TLC, after completion of the reaction, it was allowed to attain room temperature. Then the mixture was poured into 30 mL of sodium chloride solution. The product was extracted with EtOAc (15 mL X 3) and dried with anhydrous Na<sub>2</sub>SO<sub>4</sub>. Removal of the solvent under reduced pressure the left out residue was purified by column chromatography using silica gel (5% EtOAc/hexane) to afford **3** (44.1 mg; 74% yield).

## Characterization data

### ethyl (Z)-3-(phenylimino)-3H-thiazolo[3,4-a]pyridine-1-carboxylate (**3a**)<sup>(1)</sup>

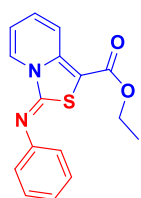

(Eluent: 5% EtOAc/hexane); 74% yield (44.1 mg); Orange solid m.p; 115-120°C <sup>1</sup>H NMR (600 MHz, CDCl<sub>3</sub>) δ 8.38 (d, J = 7.1 Hz, 1H), 8.02 (d, J = 9.4 Hz, 1H), 7.42 – 7.39 (m, 2H), 7.19 (d, J = 8.0 Hz, 2H), 7.16 – 7.10 (m, 2H), 6.47 (t, J = 6.8 Hz, 1H), 4.27 (q, J = 7.1 Hz, 2H), 1.32 (t, J = 6.9 Hz, 3H). <sup>13</sup>C NMR (150 MHz, CDCl<sub>3</sub>) δ 162.02, 153.36, 148.96, 148.73, 142.15, 131.74, 129.77, 125.80, 124.58, 121.17, 120.08, 111.04, 60.52, 14.61.

### ethyl (Z)-3-((4-methoxyphenyl)imino)-3H-thiazolo[3,4-a]pyridine-1-carboxylate (**3b**)

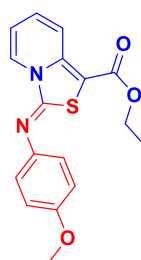

(Eluent: 5% EtOAc/hexane); 70% yield (45.9 mg); Orange solid; m.p; 121-126°C <sup>1</sup>H NMR (600 MHz, CDCl<sub>3</sub>) δ 8.36 (d, J = 6.7 Hz, 1H), 8.01 (d, J = 9.4 Hz, 1H), 7.16 – 7.13 (m, 2H), 7.12 – 7.10 (m, 1H), 6.95 (d, J = 8.3 Hz, 2H), 6.45 (t, J = 6.8 Hz, 1H), 4.28 (d, J = 7.1 Hz, 2H), 3.83 (s, 3H), 1.32 (t, J = 7.3 Hz, 3H). <sup>13</sup>C NMR (150 MHz, CDCl<sub>3</sub>) δ 162.10, 156.55, 152.42, 147.32, 142.23, 141.82, 131.80, 125.86, 122.26, 120.04, 114.88,

110.84, 60.45, 55.57, 14.63. HRMS(ESI-TOF)m/z: calcd for  $C_{17}H_{16}N_2O_3S[M+Na]^+$ : 351.0774 ; found: 351.0754.

**ethyl (Z)-3-((4-(tert-butyl)phenyl)imino)-3H-thiazolo[3,4-a]pyridine-1-carboxylate (3c)**

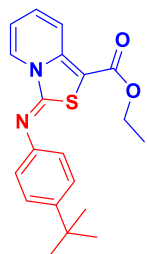

(Eluent: 5% EtOAc/hexane); 72 % yield (50.9 mg); Orange solid; m.p; 160-165°C  $^1H$  NMR (600 MHz,  $CDCl_3$ )  $\delta$  8.36 (s, 1H), 7.96 (d,  $J = 9.4$  Hz, 1H), 7.36 – 7.34 (m, 2H), 7.08 (d,  $J = 8.1$  Hz, 2H), 7.05 (dd,  $J = 9.3, 6.7$  Hz, 1H), 6.40 (t,  $J = 6.7$  Hz, 1H), 4.21 (q,  $J = 7.2$  Hz, 2H), 1.27 (s, 9H), 1.25 (t,  $J = 6.0$  Hz, 3H).  $^{13}C$  NMR (150 MHz,  $CDCl_3$ )

$\delta$  162.03, 150.22, 148.74, 142.16, 131.74, 126.54, 125.99, 125.42, 120.76, 120.04, 114.65, 111.03, 60.51, 34.56, 31.51, 14.64. HRMS(ESI-TOF)m/z: calcd for  $C_{20}H_{22}N_2O_2S[M+Na]^+$ : 377.1294 ; found: 377.1296.

**ethyl (Z)-3-(o-tolylimino)-3H-thiazolo[3,4-a]pyridine-1-carboxylate (3d)**

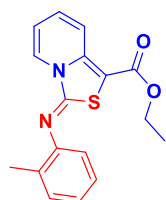

(Eluent: 5% EtOAc/hexane); 71% yield (44.3 mg); Orange solid; m.p; 114-119°C  $^1H$  NMR (600 MHz,  $CDCl_3$ )  $\delta$  8.32 (d,  $J = 6.0$  Hz, 1H), 7.96 (d,  $J = 9.4$  Hz, 1H), 7.20 (d,  $J = 7.9$  Hz, 1H), 7.16 (t,  $J = 7.5$  Hz, 1H), 7.03 (ddd,  $J = 25.3, 13.1, 7.0$  Hz, 3H), 6.40 (t,  $J = 6.7$  Hz, 1H), 4.19 (q,  $J = 7.1$  Hz, 2H), 2.17 (s, 3H), 1.24 (t,  $J = 6.0$  Hz, 3H),  $^{13}C$

NMR (150 MHz,  $CDCl_3$ )  $\delta$  162.05, 142.33, 134.91, 131.69, 131.16, 130.96, 130.78, 128.88, 127.22, 125.79, 124.69, 120.18, 119.12, 111.05, 60.48, 17.79, 14.60. HRMS(ESI-TOF)m/z: calcd for  $C_{17}H_{16}N_2O_2S[M+Na]^+$ : 335.0825 ; found: 335.0824.

**ethyl (Z)-3-((2-chlorophenyl)imino)-3H-thiazolo[3,4-a]pyridine-1-carboxylate (3e)**

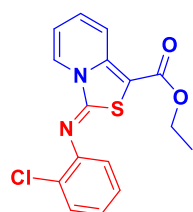

(Eluent: 5% EtOAc/hexane); 68% yield (45.1 mg); Orange solid; m.p; 110-115 °C  $^1H$  NMR (600 MHz,  $CDCl_3$ )  $\delta$  8.34 (d,  $J = 7.3$  Hz, 1H), 7.97 (d,  $J = 9.5$  Hz, 1H), 7.41 (d,  $J = 8.0$  Hz, 1H), 7.23 (dd,  $J = 11.5, 4.8$  Hz, 1H), 7.15 (d,  $J = 8.1$  Hz, 1H), 7.07 (dd,  $J = 9.5, 6.2$  Hz, 1H), 7.02 (t,  $J = 8.4$  Hz, 1H), 6.44 (t,  $J = 6.9$  Hz, 1H), 4.20 (q,  $J =$

7.0 Hz, 2H), 1.24 (t,  $J = 7.0$  Hz, 3H).  $^{13}C$  NMR (150 MHz,  $CDCl_3$ )  $\delta$  161.91, 159.49, 154.58, 146.89, 131.66, 130.61, 128.24, 128.07, 127.42, 125.79, 125.33, 121.08, 120.11, 111.36, 60.60, 14.59. HRMS(ESI-TOF)m/z: calcd for  $C_{16}H_{13}N_2O_2SCl [M+Na]^+$ : 355.0278 ; found: 355.0430.

**ethyl (Z)-3-(m-tolylimino)-3H-thiazolo[3,4-a]pyridine-1-carboxylate (3f)**

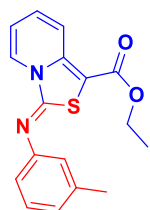

(Eluent: 5% EtOAc/hexane); 68 % yield (42.4 mg); Orange solid; m.p; 90-95°C <sup>1</sup>H NMR (600 MHz, CDCl<sub>3</sub>) δ 8.78 (d, J = 7.0 Hz, 1H), 8.20 (d, J = 8.9 Hz, 1H), 7.72 (d, J = 8.0 Hz, 2H), 7.52 – 7.45 (m, 1H), 7.20 (d, J = 7.8 Hz, 2H), 7.10 (t, J = 6.8 Hz, 1H), 4.47 (d, J = 8.0 Hz, 2H), 2.34 (s, 3H), 1.41 (t, J = 7.2 Hz, 3H). <sup>13</sup>C NMR (150 MHz, CDCl<sub>3</sub>) δ 161.52, 143.55, 139.28, 135.16, 129.73, 129.57, 129.32, 128.37, 126.46, 126.05, 125.39, 122.89, 119.45, 116.54, 61.30, 21.58, 14.52. HRMS(ESI-TOF)m/z: calcd for C<sub>17</sub>H<sub>16</sub>N<sub>2</sub>O<sub>2</sub>S[M+Na]<sup>+</sup>: 335.0825 ; found: 335.0974.

**ethyl (Z)-3-((3-iodophenyl)imino)-3H-thiazolo[3,4-a]pyridine-1-carboxylate (3g)**

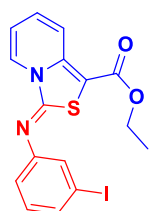

(Eluent: 5% EtOAc/hexane); 61% yield (51.6 mg); Orange solid; m.p; 135-140°C <sup>1</sup>H NMR (600 MHz, CDCl<sub>3</sub>) δ 8.30 (d, J = 7.1 Hz, 1H), 7.97 (d, J = 9.4 Hz, 1H), 7.48 (s, 1H), 7.41 (d, J = 7.3 Hz, 1H), 7.09 (t, J = 7.6 Hz, 1H), 7.05 (t, J = 8.0 Hz, 2H), 6.43 (t, J = 6.9 Hz, 1H), 4.23 (q, J = 7.2 Hz, 2H), 1.27 (t, J = 6.9 Hz, 3H). <sup>13</sup>C NMR (150 MHz, CDCl<sub>3</sub>) δ 161.84, 154.21, 148.10, 143.95, 141.96, 133.49, 131.68, 131.21, 130.45, 125.65, 120.51, 120.12, 111.45, 94.99, 60.72, 14.61. HRMS(ESI-TOF)m/z: calcd for C<sub>16</sub>H<sub>13</sub>N<sub>2</sub>O<sub>2</sub>SI[M+Na]<sup>+</sup>: 446.9635 ; found: 446.9638.

**ethyl (Z)-3-((5-fluoro-2-methylphenyl)imino)-3H-thiazolo[3,4-a]pyridine-1-carboxylate (3h)**

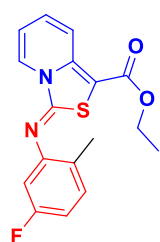

(Eluent: 5% EtOAc/hexane); 62% yield (40.9 mg); Orange solid; m.p; 116-121°C <sup>1</sup>H NMR (600 MHz, CDCl<sub>3</sub>) δ 8.28 (d, J = 7.1 Hz, 1H), 7.97 (d, J = 9.4 Hz, 1H), 7.15 – 7.12 (m, 1H), 7.06 (dd, J = 9.5, 6.1 Hz, 1H), 6.78 (dd, J = 9.8, 2.6 Hz, 1H), 6.69 (td, J = 8.4, 2.6 Hz, 1H), 6.42 (t, J = 6.9 Hz, 1H), 4.20 (q, J = 7.2 Hz, 2H), 2.11 (s, 3H), 1.24 (d, J = 6.9 Hz, 3H). <sup>13</sup>C NMR (150 MHz, CDCl<sub>3</sub>) δ 162.72, 161.52 (d, J<sub>C-F</sub> = 126 Hz), 142.19, 133.92, 131.88 (d, J<sub>C-F</sub> = 9.0 Hz, 2C), 131.65, 126.47, 125.61, 120.20, 111.13 (d, J<sub>C-F</sub> = 28.5 Hz, 2C), 110.90, 106.29 (d, J<sub>C-F</sub> = 22.5 Hz, 2C), 60.59, 17.14, 14.59. <sup>19</sup>F NMR (564 MHz,

CDCl<sub>3</sub>)  $\delta$  -115.62 to -115.66 ppm. HRMS(ESI-TOF)m/z: calcd for C<sub>17</sub>H<sub>15</sub>N<sub>2</sub>O<sub>2</sub>SF[M+Na]<sup>+</sup>: 353.0730 ; found: 353.0729.

**ethyl (Z)-3-(propylimino)-3H-thiazolo[3,4-a]pyridine-1-carboxylate (3i)**

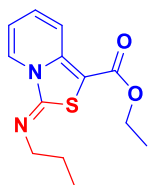

(Eluent: 5% EtOAc/hexane); 60% yield (31.6 mg); Orange solid; m.p; 95-100°C <sup>1</sup>H NMR (600 MHz, CDCl<sub>3</sub>)  $\delta$  8.35 – 8.12 (m, 1H), 7.97 (d, J = 9.2 Hz, 1H), 7.08 (dd, J = 8.9, 6.5 Hz, 1H), 6.38 (s, 1H), 4.32 – 4.28 (m, 2H), 3.17 (t, J = 6.9 Hz, 2H), 1.78 – 1.75 (m, 2H), 1.35 (t, J = 7.1 Hz, 3H), 1.02 (t, J = 7.4 Hz, 3H). <sup>13</sup>C NMR (150 MHz, CDCl<sub>3</sub>)  $\delta$  162.26, 142.83, 140.35, 132.00, 130.86, 125.95, 119.98, 110.20, 60.33, 56.05, 23.66, 14.68, 12.14. HRMS(ESI-TOF)m/z: calcd for C<sub>13</sub>H<sub>16</sub>N<sub>2</sub>O<sub>2</sub>S[M+Na]<sup>+</sup>: 287.0825; found: 287.1062.

**(Z)-N,1-diphenyl-3H-thiazolo[3,4-a]pyridin-3-imine (5a)**

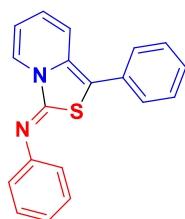

(Eluent: 5% EtOAc/hexane); 61% yield (36.8 mg); Orange solid; m.p; 92-97°C <sup>1</sup>H NMR (500 MHz, CDCl<sub>3</sub>)  $\delta$  7.98 (dd, J = 7.5, 0.7 Hz, 1H), 7.36 (ddd, J = 9.8, 6.9, 3.3 Hz, 6H), 7.23 – 7.17 (m, 3H), 7.09 (d, J = 8.4 Hz, 2H), 6.53 (dd, J = 9.6, 6.0 Hz, 1H), 6.02 (dd, J = 7.2, 6.3 Hz, 1H). <sup>13</sup>C NMR (125 MHz, CDCl<sub>3</sub>)  $\delta$  152.40, 149.17, 131.40, 129.69, 128.50, 127.88, 126.45, 125.59, 125.20, 124.09, 122.42, 120.10, 117.28, 107.47, 99.52. HRMS(ESI-TOF)m/z: calcd for C<sub>19</sub>H<sub>14</sub>N<sub>2</sub>S[M+K]<sup>+</sup>: 341.0509 ; found: 341.0505.

**(Z)-1-phenyl-N-(o-tolyl)-3H-thiazolo[3,4-a]pyridin-3-imine (5b)**

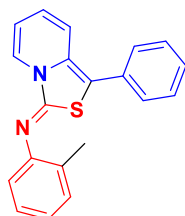

(Eluent: 5% EtOAc/hexane); 55% yield (34.7 mg); Orange solid; m.p; 85-90°C <sup>1</sup>H NMR (600 MHz, CDCl<sub>3</sub>)  $\delta$  7.93 (d, J = 7.5 Hz, 1H), 7.28 – 7.25 (m, 4H), 7.18 (d, J = 7.5 Hz, 1H), 7.13 (s, 2H), 7.06 – 7.01 (m, 2H), 6.94 (td, J = 7.4, 1.0 Hz, 1H), 6.47 (ddd, J = 9.6, 6.0, 0.9 Hz, 1H), 5.98 – 5.94 (m, 1H), 2.18 (s, 3H). <sup>13</sup>C NMR (150 MHz, CDCl<sub>3</sub>)  $\delta$  153.19, 149.21, 133.02, 132.69, 130.99, 129.01, 128.25, 127.53, 127.05, 126.67, 126.32, 125.32, 124.72, 123.72, 119.16, 118.54, 108.48, 17.89. HRMS(ESI-TOF)m/z: calcd for C<sub>20</sub>H<sub>16</sub>N<sub>2</sub>S[M+H]<sup>+</sup>: 317.1107 ; found: 317.1117.

**(Z)-N-(4-nitrophenyl)-1-phenyl-3H-thiazolo[3,4-a]pyridin-3-imine (5c)**

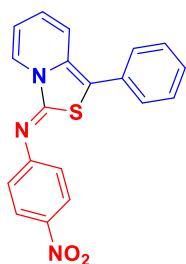

(Eluent: 5% EtOAc/hexane); 45% yield (31.2 mg); Orange solid; m.p; 80-85°C <sup>1</sup>H NMR (600 MHz, CDCl<sub>3</sub>) δ 8.25 (t, J = 5.7 Hz, 2H), 8.10 (d, J = 7.6 Hz, 1H), 7.42 (d, J = 4.5 Hz, 4H), 7.32 (d, J = 9.0 Hz, 3H), 7.21 (d, J = 9.4 Hz, 1H), 6.67 (dd, J = 9.6, 6.1 Hz, 1H), 6.22 (t, J = 6.8 Hz, 1H). <sup>13</sup>C NMR (150 MHz, CDCl<sub>3</sub>) δ 155.60, 153.06, 133.02, 131.67, 131.07, 129.28, 128.03, 127.53, 126.40, 125.70, 125.04, 121.36, 118.57, 115.95, 110.07. HRMS(ESI-TOF)m/z: calcd for C<sub>19</sub>H<sub>13</sub>N<sub>3</sub>O<sub>2</sub>S[M+H]<sup>+</sup>: 348.0801; found: 348.0950.

**(Z)-N-(4-fluorophenyl)-1-phenyl-3H-thiazolo[3,4-a]pyridin-3-imine (5d)**

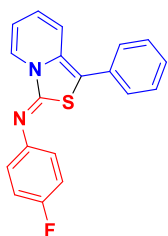

(Eluent: 5% EtOAc/hexane); 52% yield (33.2 mg); Orange solid; m.p; 101-106°C <sup>1</sup>H NMR (600 MHz, CDCl<sub>3</sub>) δ 7.93 (d, J = 7.3 Hz, 1H), 7.29 (d, J = 4.4 Hz, 4H), 7.16 (dd, J = 8.2, 4.0 Hz, 1H), 7.09 – 7.05 (m, 3H), 6.99 (t, J = 8.6 Hz, 2H), 6.50 (dd, J = 9.5, 5.9 Hz, 1H), 6.00 (t, J = 6.7 Hz, 1H). <sup>13</sup>C NMR (150 MHz, CDCl<sub>3</sub>) δ 159.17(d, J<sub>C-F</sub> = 181.0 Hz), 153.98, 146.51, 132.47, 130.91, 129.08, 127.65, 126.62(d, J<sub>C-F</sub> = 69 Hz, 2C), 125.15, 122.51(d, J<sub>C-F</sub> = 9.0 Hz, 2C), 118.49, 116.27(d, J<sub>C-F</sub> = 22.5 Hz, 2C), 108.73, 100.68. <sup>19</sup>F NMR (564 MHz, CDCl<sub>3</sub>) δ -111.54 ppm. HRMS(ESI-TOF)m/z: calcd for C<sub>19</sub>H<sub>13</sub>N<sub>2</sub>FS[M+H]<sup>+</sup>: 321.0856 ; found: 321.0825.

**(Z)-N-(2-chlorophenyl)-1-phenyl-3H-thiazolo[3,4-a]pyridin-3-imine (5e)**

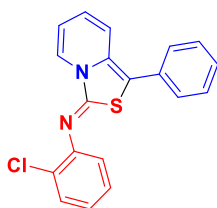

(Eluent: 5% EtOAc/hexane); 65% yield (43.6 mg); Orange solid; m.p; 110-115°C <sup>1</sup>H NMR (600 MHz, CDCl<sub>3</sub>) δ 8.06 (d, J = 7.5 Hz, 1H), 7.48 – 7.45 (m, 1H), 7.37 – 7.35 (m, 4H), 7.25 (ddd, J = 9.0, 6.3, 2.1 Hz, 3H), 7.13 (d, J = 9.6 Hz, 1H), 7.02 (ddd, J = 8.2, 6.4, 2.5 Hz, 1H), 6.59 (ddd, J = 9.6, 6.1, 0.9 Hz, 1H), 6.10 (ddd, J = 7.2, 6.2, 0.8 Hz, 1H). <sup>13</sup>C NMR (125 MHz, CDCl<sub>3</sub>) δ 157.42, 150.11, 135.12, 133.72, 133.28, 131.87, 130.72, 130.51, 129.73, 129.09, 128.07, 127.15, 123.91, 121.27, 111.90, 104.34. HRMS(ESI-TOF)m/z: calcd for C<sub>19</sub>H<sub>12</sub>N<sub>2</sub>ClS[M+H]<sup>+</sup>: 337.0561; found: 337.1260.

**(Z)-1-phenyl-N-(2-(trifluoromethyl)phenyl)-3H-thiazolo[3,4-a]pyridin-3-imine (5f)**

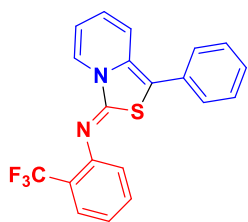

(Eluent: 5% EtOAc/hexane); 55% yield (40.7 mg); sticky Orange  $^1\text{H}$  NMR (600 MHz,  $\text{CDCl}_3$ )  $\delta$  8.00 -7.97 (m, 1H), 7.62 (d,  $J = 7.8$  Hz, 1H), 7.44 (dd,  $J = 16.3, 7.9$  Hz, 2H), 7.31 (t,  $J = 8.4$  Hz, 5H), 7.06 (dd,  $J = 14.8, 7.8$  Hz, 2H), 6.54 (dd,  $J = 9.4, 6.1$  Hz, 1H), 6.05 (t,  $J = 6.2$  Hz, 1H).  $^{13}\text{C}$  NMR (150 MHz,  $\text{CDCl}_3$ )  $\delta$  153.56, 148.42, 133.02, 132.27, 130.91, 129.11, 127.28 (q,  $J_{\text{CF}_3} = 85.5$  Hz), 126.46, 125.30, 123.54 (q,  $J_{\text{CF}_3} = 18.0$  Hz, 2C), 122.71, 119.89, 118.39, 109.31, 101.37.  $^{19}\text{F}$  NMR (564 MHz,  $\text{CDCl}_3$ )  $\delta$  -52.46 to -62.56 ppm. HRMS(ESI-TOF) $m/z$ : calcd for  $\text{C}_{20}\text{H}_{13}\text{N}_2\text{F}_3\text{S}[\text{M}+\text{Na}]^+$ : 393.0644 ; found: 393.0646.

**(Z)-N-(2-(methylthio)ethyl)-1-phenyl-3H-thiazolo[3,4-a]pyridin-3-imine (5g)**

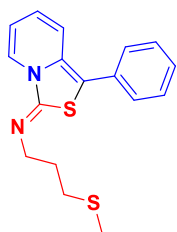

(Eluent: 5% EtOAc/hexane); 58% yield (34.8 mg); Orange solid; m.p; 105-110°C  $^1\text{H}$  NMR (600 MHz,  $\text{CDCl}_3$ )  $\delta$  7.76 (d,  $J = 7.1$  Hz, 1H), 7.40 – 7.36 (m, 4H), 7.22 (t,  $J = 7.2$  Hz, 1H), 7.05 (d,  $J = 9.4$  Hz, 1H), 6.50 (dd,  $J = 9.5, 6.0$  Hz, 1H), 5.92 (t,  $J = 6.5$  Hz, 1H), 3.26 (t,  $J = 6.6$  Hz, 2H), 2.68 (t,  $J = 7.1$  Hz, 2H), 2.13 (s, 3H), 2.06 – 2.01 (m, 2H).  $^{13}\text{C}$  NMR (150 MHz,  $\text{CDCl}_3$ )  $\delta$  153.68, 137.14, 131.41, 129.00, 127.32, 126.59, 126.37, 125.41, 118.27, 107.54, 99.98, 53.08, 32.35, 30.28, 15.70. HRMS(ESI-TOF) $m/z$ : calcd for  $\text{C}_{17}\text{H}_{19}\text{N}_2\text{S}_2[\text{M}+\text{Na}]^+$ : 337.0804 ; found: 337.0822.

**(Z)-N-cyclohexyl-1-phenyl-3H-thiazolo[3,4-a]pyridin-3-imine (5h)**

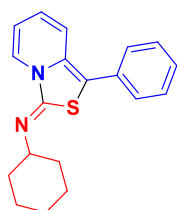

(Eluent: 5% EtOAc/hexane); 40% yield (24.6 mg); Orange solid; m.p; 95-100°C  $^1\text{H}$  NMR (500 MHz,  $\text{CDCl}_3$ )  $\delta$  7.76 (d,  $J = 7.3$  Hz, 1H), 7.37 (q,  $J = 8.4$  Hz, 4H), 7.21 (t,  $J = 6.8$  Hz, 1H), 7.02 (d,  $J = 9.6$  Hz, 1H), 6.48 (dd,  $J = 9.5, 6.0$  Hz, 1H), 5.87 (s, 1H), 2.94 (td,  $J = 9.3, 4.3$  Hz, 1H), 1.88 (s, 2H), 1.85 – 1.79 (m, 2H), 1.61 (s, 2H), 1.40 (dd,  $J = 17.1, 10.0$  Hz, 4H).  $^{13}\text{C}$  NMR (150 MHz,  $\text{CDCl}_3$ )  $\delta$  140.28, 133.30, 131.86, 131.24, 128.86, 127.13, 126.61, 126.10, 125.71, 118.08, 63.94, 33.06, 25.90, 25.07. HRMS(ESI-TOF) $m/z$ : calcd for  $\text{C}_{19}\text{H}_{20}\text{N}_2\text{S}[\text{M}+\text{H}]^+$ : 309.1420 ; found: 309.1408.

**(Z)-1-(4-chlorophenyl)-N-phenyl-3H-thiazolo[3,4-a]pyridin-3-imine (5i)**

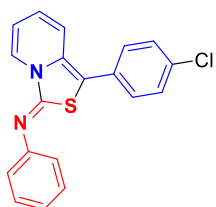

(Eluent: 5% EtOAc/hexane); 65% yield (43.6 mg); Orange solid; m.p; 115-120°C  $^1\text{H}$  NMR (500 MHz,  $\text{CDCl}_3$ )  $\delta$  8.04 – 7.97 (m, 1H), 7.38 (t,  $J = 7.5$  Hz, 2H), 7.33 – 7.24 (m, 4H), 7.18 (s, 2H), 7.09 (dd,  $J = 7.8, 6.9$  Hz, 1H), 7.08 – 7.01 (m, 1H), 6.57 (dd,  $J = 9.6, 6.1$  Hz, 1H), 6.05 (dd,  $J = 7.3, 6.3$  Hz, 1H).  $^{13}\text{C}$  NMR (125 MHz,  $\text{CDCl}_3$ )  $\delta$  152.07, 149.02, 131.04, 130.05, 129.95, 128.53, 128.04, 127.47, 125.73, 124.21, 122.57, 120.03, 116.91, 107.55, 98.02. HRMS(ESI-TOF) $m/z$ : calcd for  $\text{C}_{19}\text{H}_{13}\text{N}_2\text{ClS}$ [ $\text{M}+\text{H}$ ] $^+$ : 337.0561 ; found: 337.0554.

**(Z)-1-(4-chlorophenyl)-N-(4-nitrophenyl)-3H-thiazolo[3,4-a]pyridin-3-imine (5j)**

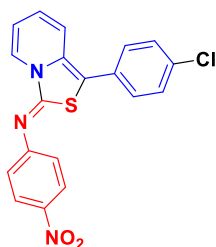

(Eluent: 5% EtOAc/hexane); 50% yield (38.1 mg); Orange solid; m.p; 65-70°C  $^1\text{H}$  NMR (500 MHz,  $\text{CDCl}_3$ )  $\delta$  8.72 (d,  $J = 4.3$  Hz, 1H), 8.07 (d,  $J = 8.4$  Hz, 4H), 7.91 (d,  $J = 7.7$  Hz, 1H), 7.51 (dd,  $J = 7.5, 4.8$  Hz, 2H), 7.46 (d,  $J = 8.4$  Hz, 3H), 7.34 (dd,  $J = 19.6, 10.0$  Hz, 1H).  $^{13}\text{C}$  NMR (125 MHz,  $\text{CDCl}_3$ )  $\delta$  153.57, 147.42, 138.31, 136.10, 133.47, 131.39, 128.29, 128.09, 127.90, 127.71, 127.37, 125.33, 124.52, 123.59, 120.19. HRMS(ESI-TOF) $m/z$ : calcd for  $\text{C}_{19}\text{H}_{12}\text{N}_3\text{ClSO}_2$ [ $\text{M}+\text{Na}$ ] $^+$ : 404.0231; found: 404.0742.

**(Z)-1-(4-chlorophenyl)-N-(4-(trifluoromethyl)phenyl)-3H-thiazolo[3,4-a]pyridin-3-imine (5k)**

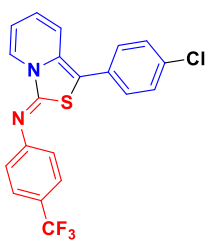

(**5k**) (Eluent: 5% EtOAc/hexane); 48% yield (38.7 mg); Orange solid; m.p; 135-140°C  $^1\text{H}$  NMR (500 MHz,  $\text{CDCl}_3$ )  $\delta$  8.02 (d,  $J = 7.5$  Hz, 1H), 7.62 (d,  $J = 8.4$  Hz, 2H), 7.39 – 7.25 (m, 6H), 7.09 (d,  $J = 9.6$  Hz, 1H), 6.64 (dd,  $J = 9.6, 6.1$  Hz, 1H), 6.14 (t,  $J = 6.8$  Hz, 1H).  $^{13}\text{C}$  NMR (125 MHz,  $\text{CDCl}_3$ )  $\delta$  152.26 (q,  $J_{\text{CF}_3} = 31.5$  Hz), 131.50, 130.02, 129.51 (d,  $J_{\text{C-F}} = 76.5$  Hz, 2C), 128.15, 127.66 (d,  $J_{\text{C-F}} = 73.5$  Hz, 2C), 125.70, 124.03, 120.18, 116.98, 108.13, 98.69.  $^{19}\text{F}$  NMR (564 MHz,  $\text{CDCl}_3$ )  $\delta$  -63.60 ppm. HRMS(ESI-TOF) $m/z$ : calcd for  $\text{C}_{20}\text{H}_{12}\text{N}_2\text{ClSF}_3$ [ $\text{M}+\text{H}$ ] $^+$ : 405.0435 ; found: 405.0706.

**(Z)-N-(2-chlorophenyl)-1-(4-chlorophenyl)-3H-thiazolo[3,4-a]pyridin-3-imine (5l)**



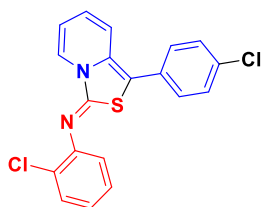

(Eluent: 5% EtOAc/hexane); 68% yield (50.3 mg); Orange solid; m.p; 105-110°C  $^1\text{H}$  NMR (600 MHz,  $\text{CDCl}_3$ )  $\delta$  8.06 (s, 1H), 7.40 (d,  $J = 8.1$  Hz, 1H), 7.25 (d,  $J = 1.8$  Hz, 1H), 7.24 – 7.20 (m, 3H), 7.18 (dd,  $J = 9.9, 6.0$  Hz, 2H), 7.02 (d,  $J = 9.5$  Hz, 1H), 7.00 – 6.97 (m, 1H), 6.57 (dd,  $J = 9.6, 6.1$  Hz, 1H), 6.09 (t,  $J = 6.6$  Hz, 1H).  $^{13}\text{C}$  NMR (150 MHz,  $\text{CDCl}_3$ )  $\delta$  136.11, 132.62, 131.38, 130.70, 130.57, 129.30, 128.84, 128.02, 127.68, 126.82, 125.47, 124.79, 122.15, 121.45, 120.19, 118.15, 109.49. HRMS(ESI-TOF)m/z: calcd for  $\text{C}_{19}\text{H}_{12}\text{N}_2\text{Cl}_2\text{S}[\text{M}+\text{H}]^+$ : 371.0171 ; found: 371.0171.

**(Z)-1-(4-chlorophenyl)-N-ethyl-3H-thiazolo[3,4-a]pyridin-3-imine (5m)**

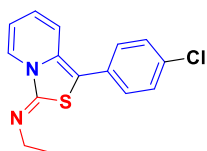

(Eluent: 5% EtOAc/hexane); 55% yield (31.6 mg); Orange solid; m.p; 120-125°C  $^1\text{H}$  NMR (500 MHz,  $\text{CDCl}_3$ )  $\delta$  7.79 (d,  $J = 7.4$  Hz, 1H), 7.36 – 7.31 (m, 4H), 7.01 (dd,  $J = 9.6, 0.9$  Hz, 1H), 6.57 – 6.52 (m, 1H), 5.95 (t,  $J = 6.8$  Hz, 1H), 3.23 (q,  $J = 7.2$  Hz, 2H), 1.36 (t,  $J = 7.2$  Hz, 3H).  $^{13}\text{C}$  NMR (125 MHz,  $\text{CDCl}_3$ )  $\delta$  151.73, 130.59, 128.77, 128.56, 127.94, 127.15, 125.95, 124.38, 116.69, 106.41, 47.83, 14.45. HRMS(ESI-TOF)m/z: calcd for  $\text{C}_{15}\text{H}_{13}\text{N}_2\text{ClS}[\text{M}+\text{H}]^+$ : 289.0561 ; found: 289.0581.

**(Z)-1-(4-chlorophenyl)-N-propyl-3H-thiazolo[3,4-a]pyridin-3-imine (5n)**

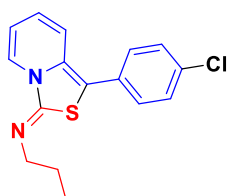

(Eluent: 5% EtOAc/hexane); 53% yield (32.0 mg); Orange solid; m.p; 125-130°C  $^1\text{H}$  NMR (500 MHz,  $\text{CDCl}_3$ )  $\delta$  7.79 (d,  $J = 7.4$  Hz, 1H), 7.32 (d,  $J = 2.4$  Hz, 4H), 6.99 (d,  $J = 9.7$  Hz, 1H), 6.57 – 6.50 (m, 1H), 5.93 (t,  $J = 6.7$  Hz, 1H), 3.13 (t,  $J = 7.0$  Hz, 2H), 1.75 (dt,  $J = 14.5, 7.3$  Hz, 2H), 1.02 (t,  $J = 7.4$  Hz, 3H).  $^{13}\text{C}$  NMR (125 MHz,  $\text{CDCl}_3$ )  $\delta$  154.65, 135.37, 130.62, 130.47, 127.94, 127.13, 125.97, 124.45, 120.69, 116.69, 106.35, 55.39, 22.79, 11.01. HRMS(ESI-TOF)m/z: calcd for  $\text{C}_{16}\text{H}_{15}\text{N}_2\text{ClS}[\text{M}+\text{H}]^+$ : 303.0717 ; found: 303.0749.

**(Z)-N-butyl-1-(4-chlorophenyl)-3H-thiazolo[3,4-a]pyridin-3-imine (5o)**

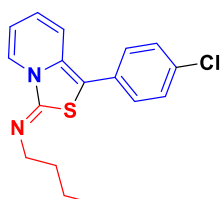

(Eluent: 5% EtOAc/hexane); 56% yield (35.3 mg); Orange solid; m.p; 135-140°C  $^1\text{H}$  NMR (500 MHz,  $\text{CDCl}_3$ )  $\delta$  7.77 (d,  $J = 7.4$  Hz, 1H), 7.32 (d,  $J = 2.0$  Hz, 4H), 6.99 (d,  $J = 9.7$  Hz, 1H), 6.53 (dd,  $J = 15.0, 6.0$  Hz, 1H), 5.92 (t,  $J =$

6.7 Hz, 1H), 3.17 (t, J = 7.0 Hz, 2H), 1.72 (dt, J = 14.7, 7.2 Hz, 2H), 1.47 (dd, J = 15.0, 7.4 Hz, 2H), 0.97 (t, J = 7.4 Hz, 3H). <sup>13</sup>C NMR (125 MHz, CDCl<sub>3</sub>) δ 151.55, 139.40, 130.66, 130.61, 130.44, 127.93, 127.11, 125.98, 124.46, 116.68, 106.30, 53.30, 31.64, 19.61, 12.88. HRMS(ESI-TOF)m/z: calcd for C<sub>17</sub>H<sub>17</sub>N<sub>2</sub>ClS[M+H]<sup>+</sup>: 317.0878; found: 317.0876.

**(Z)-1-(4-chlorophenyl)-N-isobutyl-3H-thiazolo[3,4-a]pyridin-3-imine (5p)**

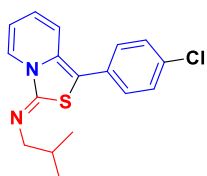

(Eluent: 5% EtOAc/hexane); 60% yield (37.9 mg); Orange solid; m.p; 95-100°C

<sup>1</sup>H NMR (500 MHz, CDCl<sub>3</sub>) δ 7.80 (d, J = 7.4 Hz, 1H), 7.31 (d, J = 2.1 Hz, 4H), 6.99 (d, J = 9.6 Hz, 1H), 6.53 (dd, J = 9.3, 6.2 Hz, 1H), 5.92 (t, J = 6.7 Hz, 1H),

2.96 (d, J = 6.7 Hz, 2H), 2.01 (dd, J = 13.3, 6.7 Hz, 1H), 1.02 (s, 3H), 1.00 (s, 3H). <sup>13</sup>C NMR (125 MHz, CDCl<sub>3</sub>) δ 156.27, 151.26, 130.72, 130.61, 130.39, 127.92, 127.07, 126.01, 116.67, 106.21, 96.98, 61.53, 21.54, 19.68, 13.00. HRMS(ESI-TOF)m/z: calcd for C<sub>17</sub>H<sub>17</sub>N<sub>2</sub>ClS[M+H]<sup>+</sup>: 317.0878; found: 317.0872.

## Reference

(1). Z. Zhang, V. G evorgyan, Co-Catalyzed Transannulation of Pyridotriazoles with Isothiocyanates and Xanthate Esters, *Org. Lett.*, 2020, **22**, 8500.

# Copies of $^1\text{H}$ and $^{13}\text{C}$ NMR spectra

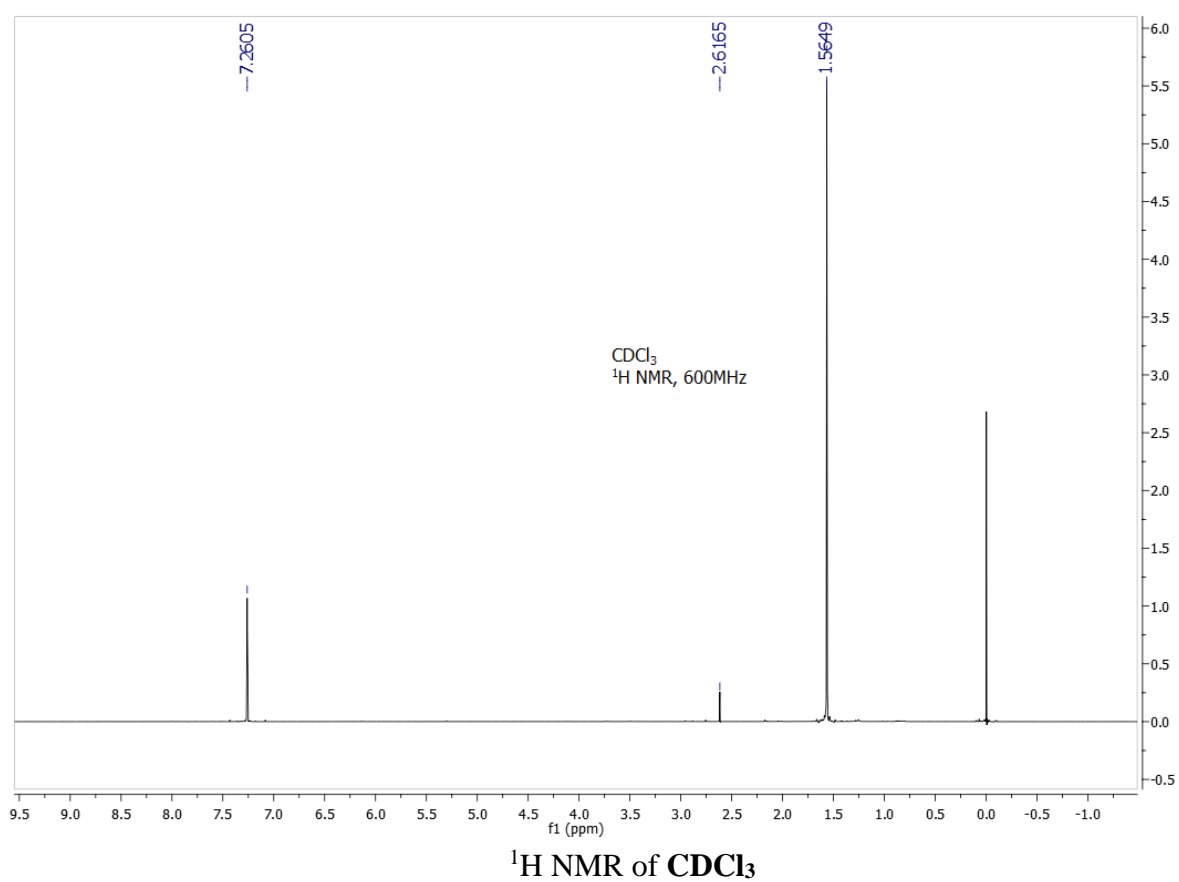

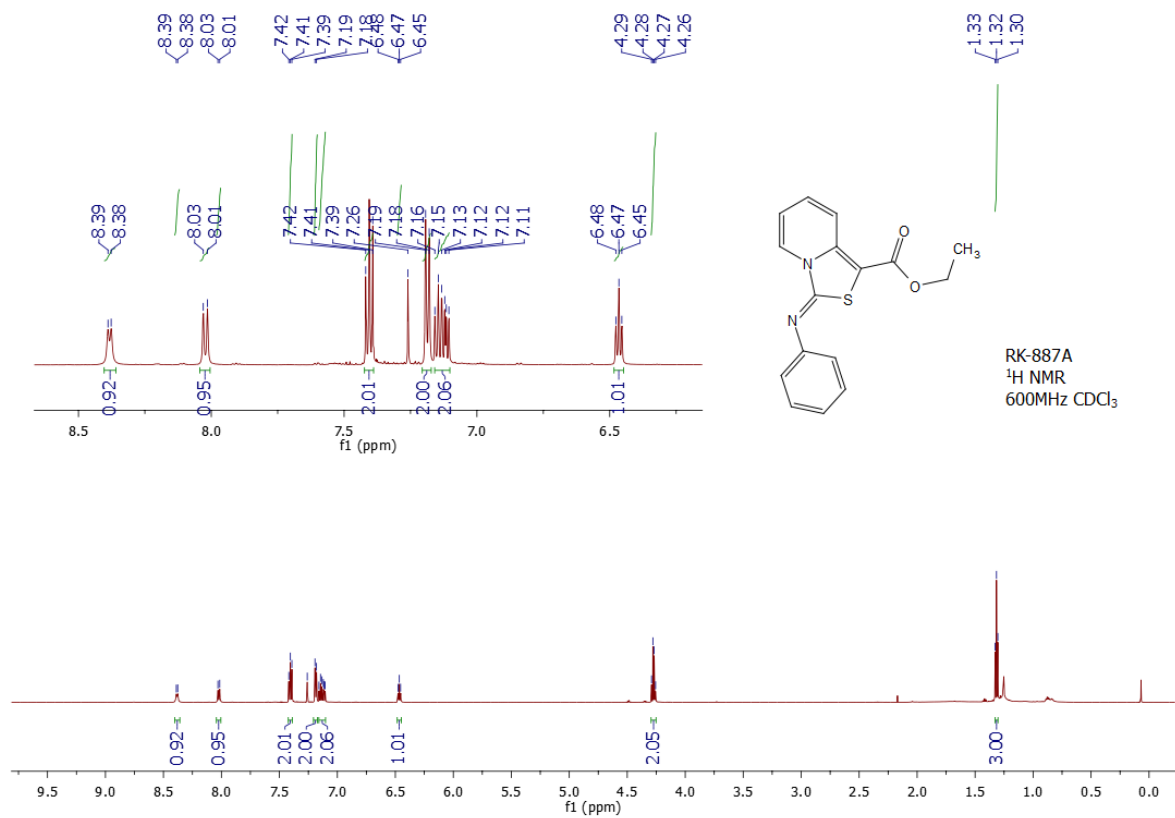

**<sup>1</sup>H NMR of 3a**

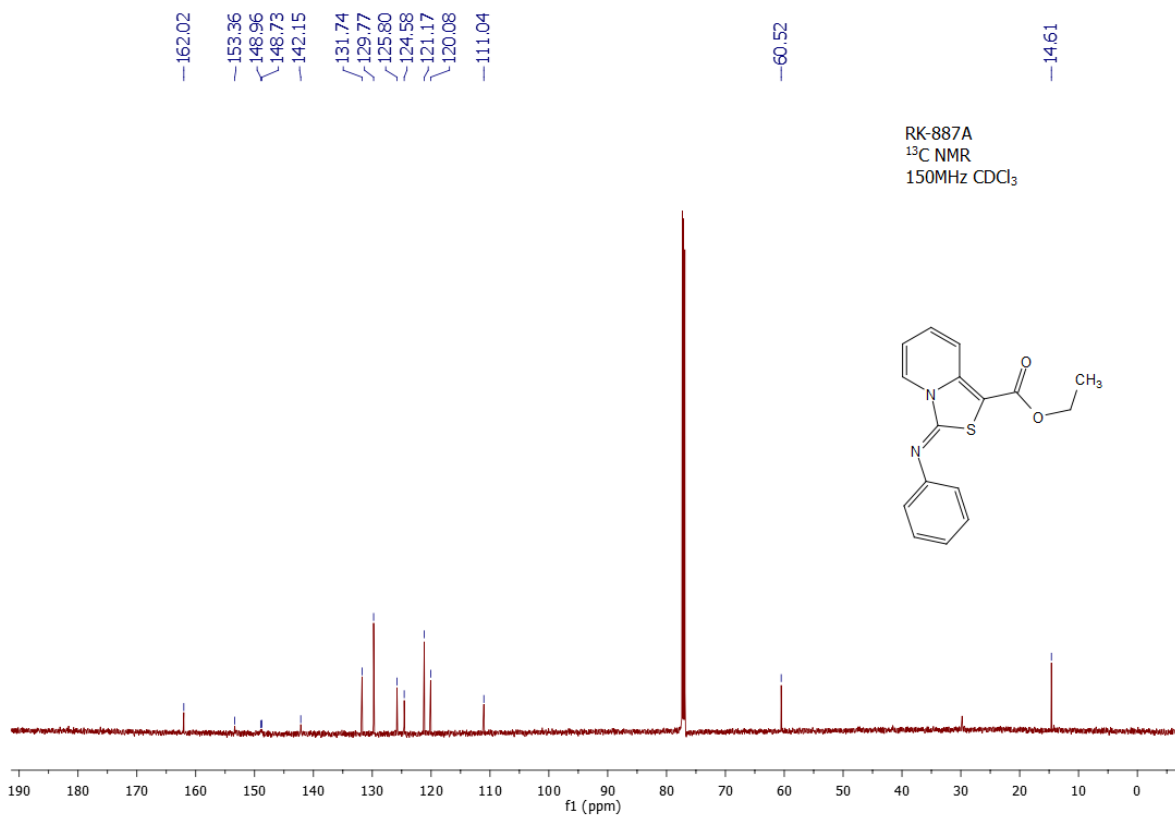

**<sup>13</sup>C NMR of 3a**

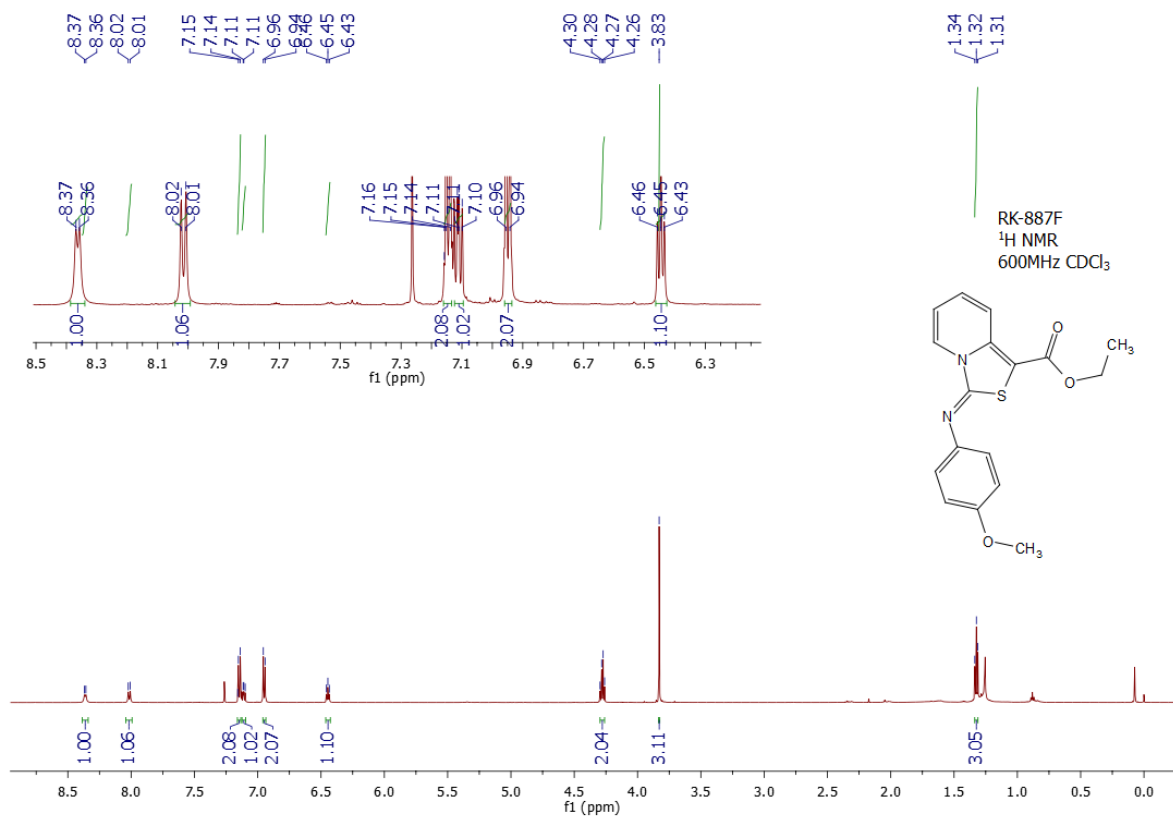

<sup>1</sup>H NMR of **3b**

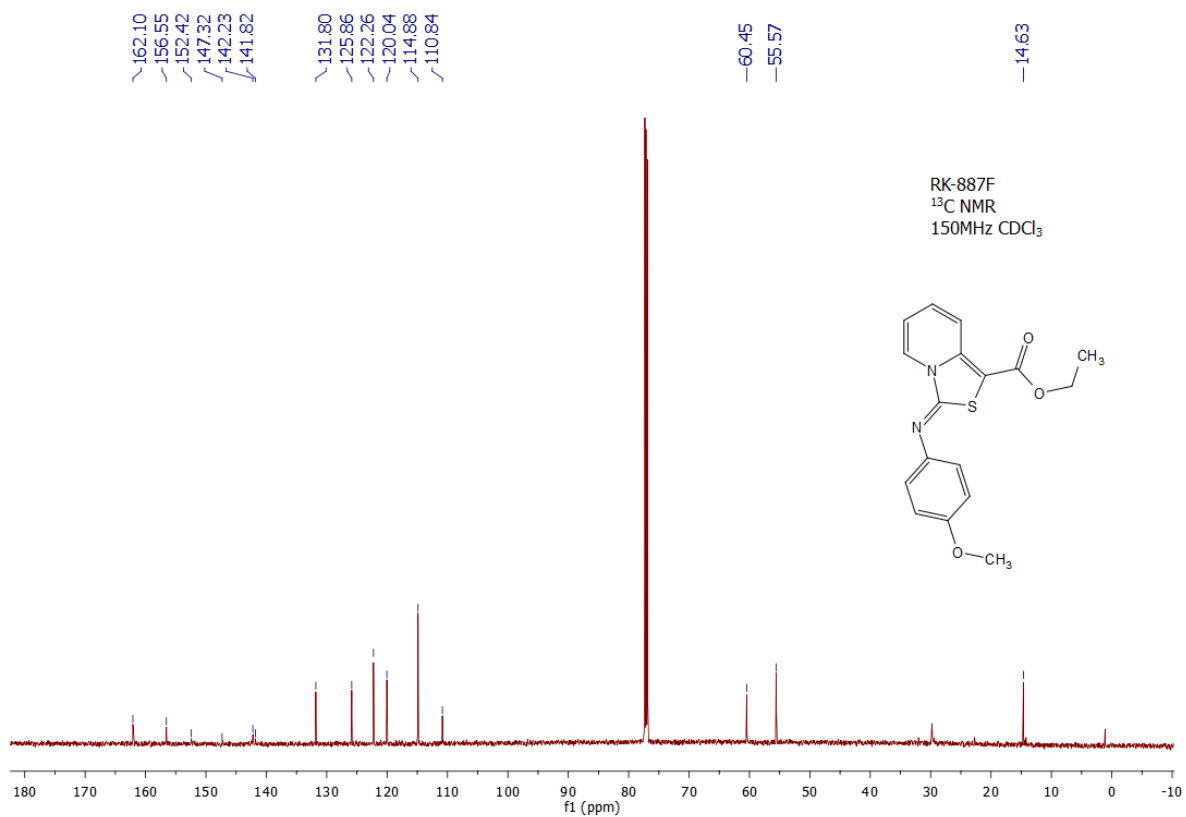

<sup>13</sup>C NMR of **3b**

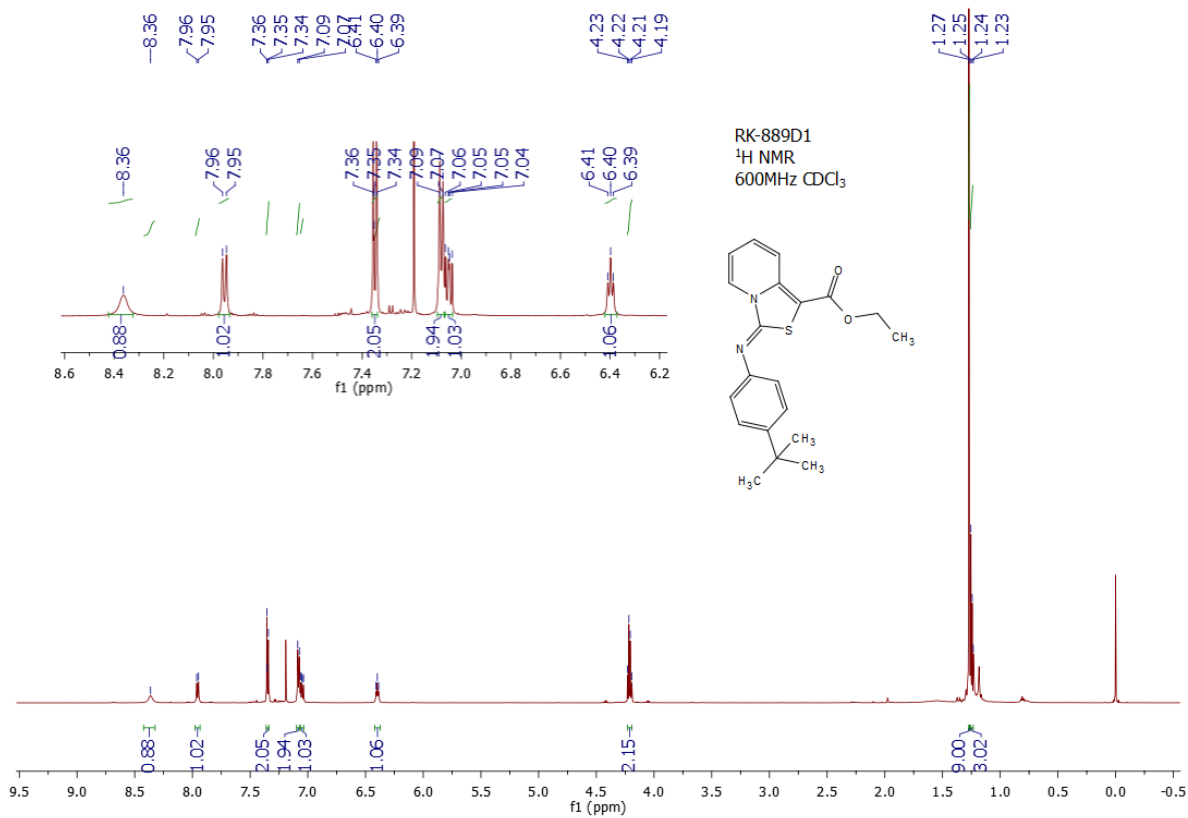

<sup>1</sup>H NMR of **3c**

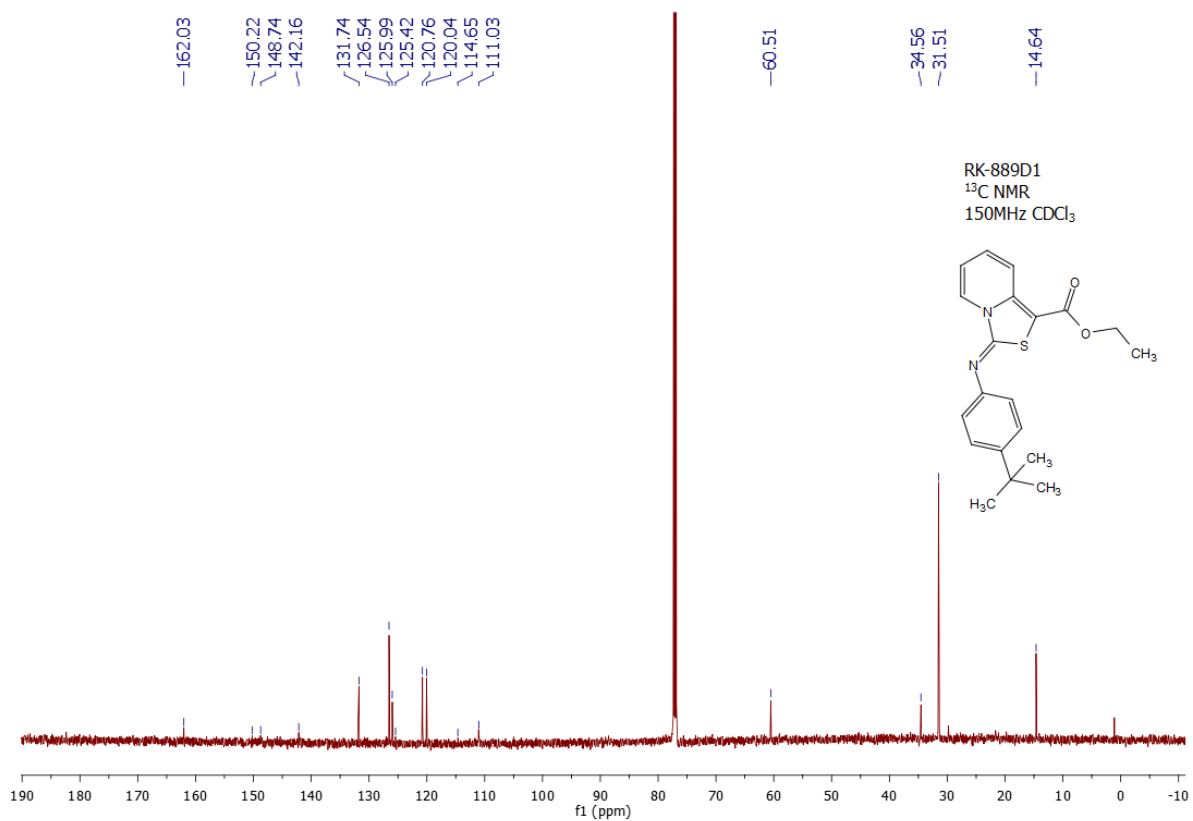

<sup>13</sup>C NMR of **3c**

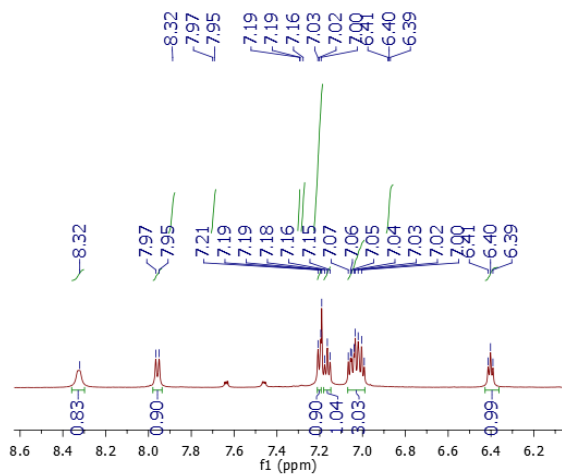

<sup>1</sup>H NMR of **3d**

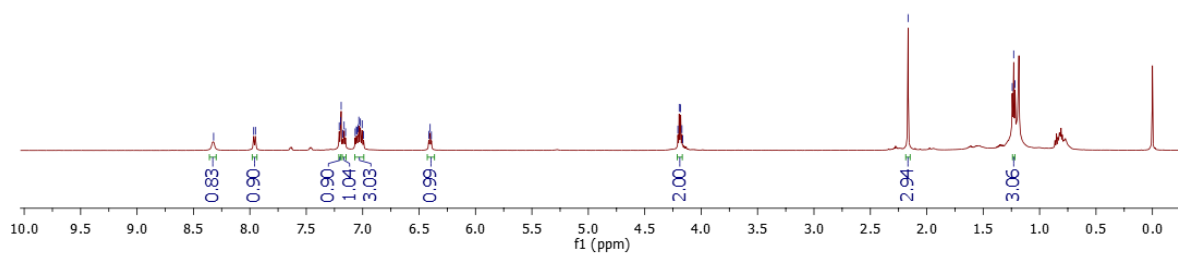

<sup>13</sup>C NMR of **3d**

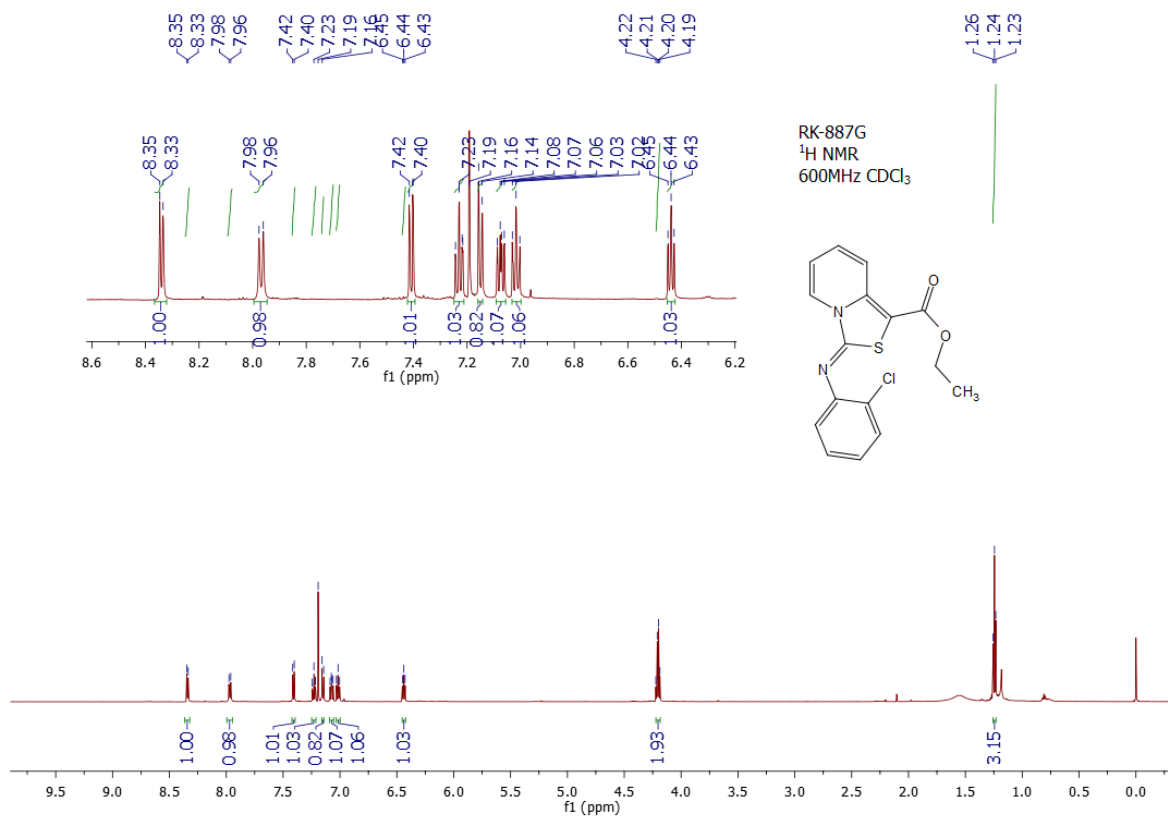

<sup>1</sup>H NMR of 3e

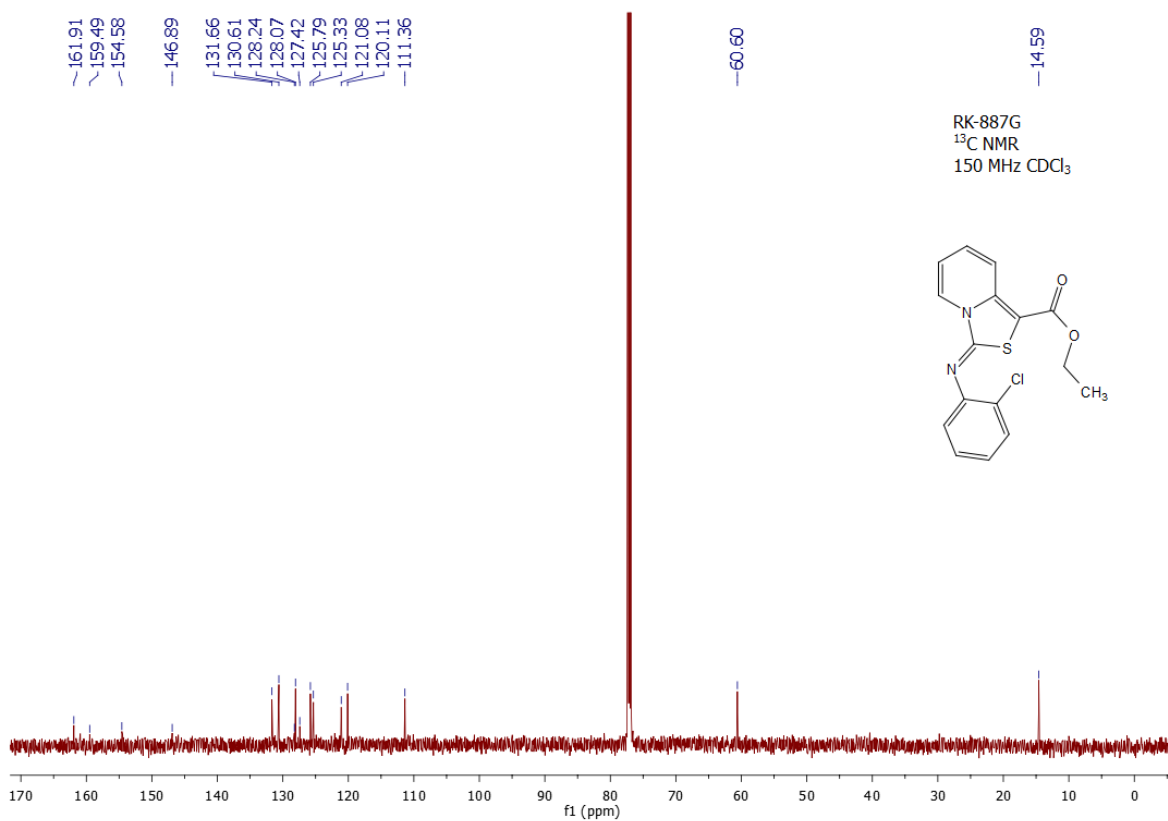

<sup>13</sup>C NMR of 3e



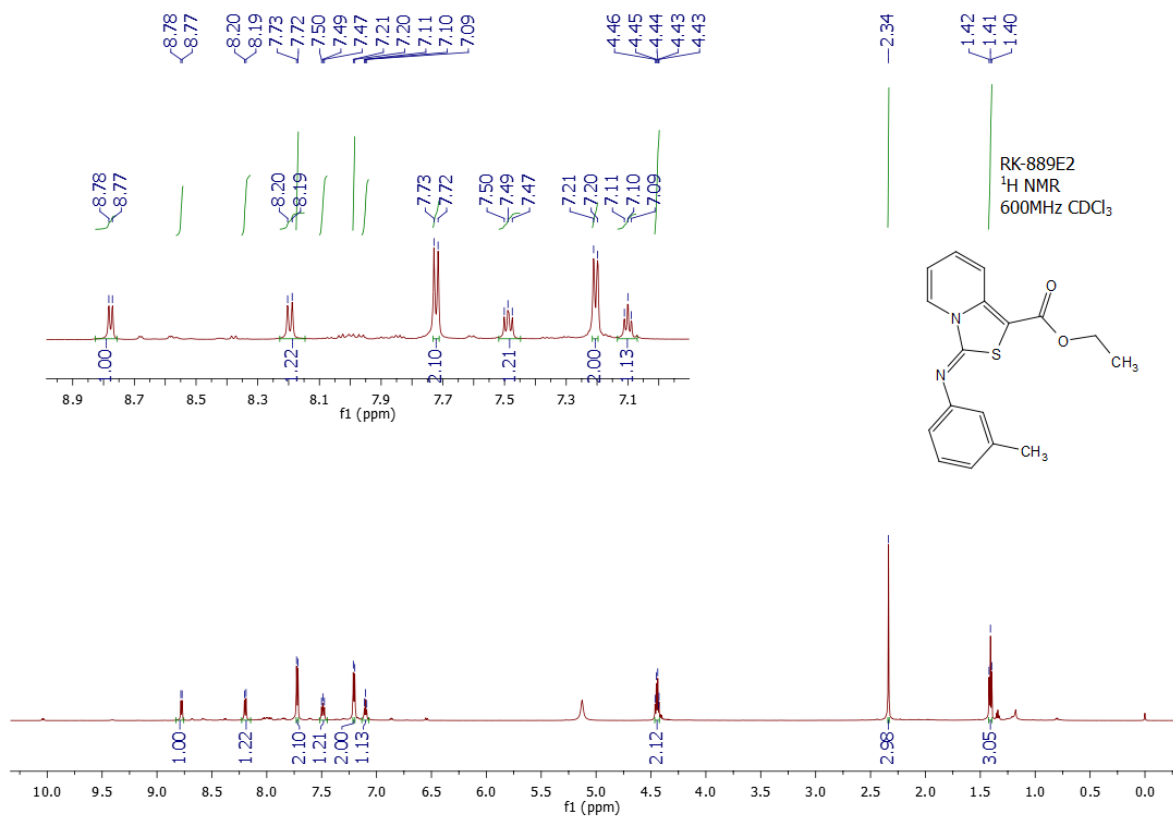

$^1\text{H NMR}$  of **3f**

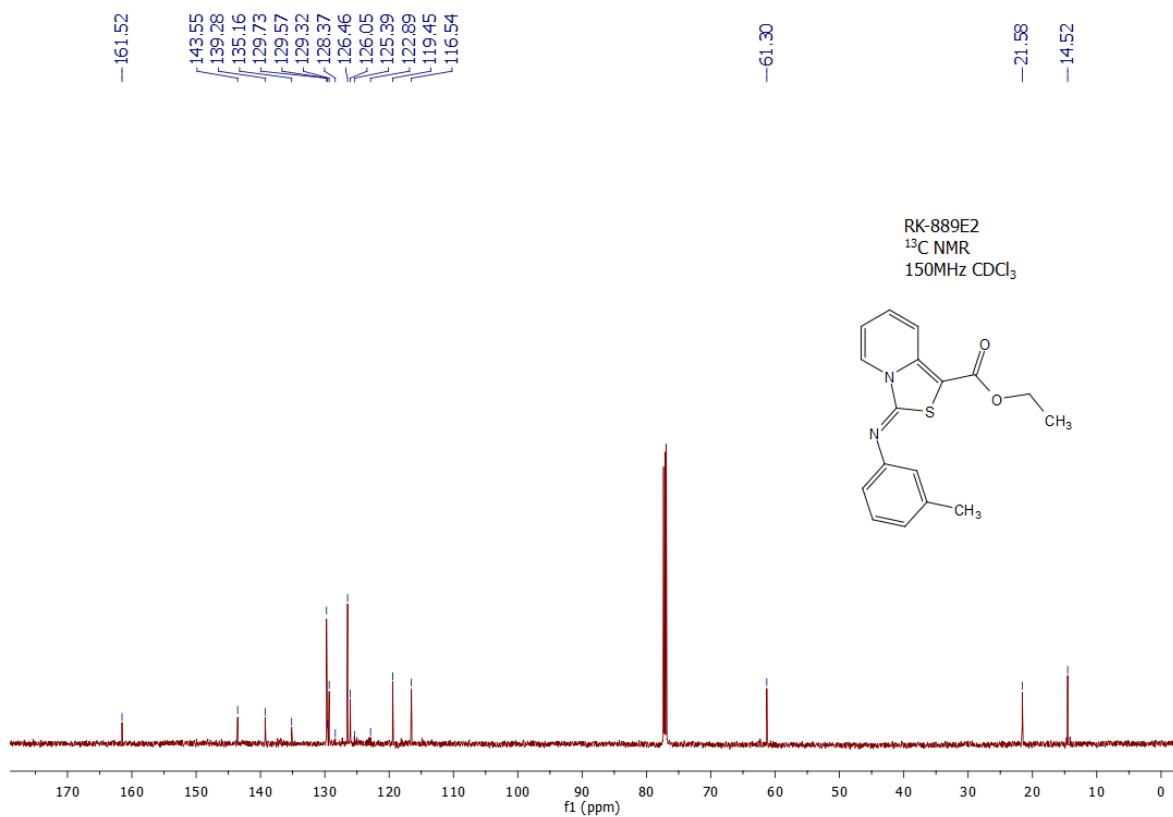

$^{13}\text{C NMR}$  of **3f**

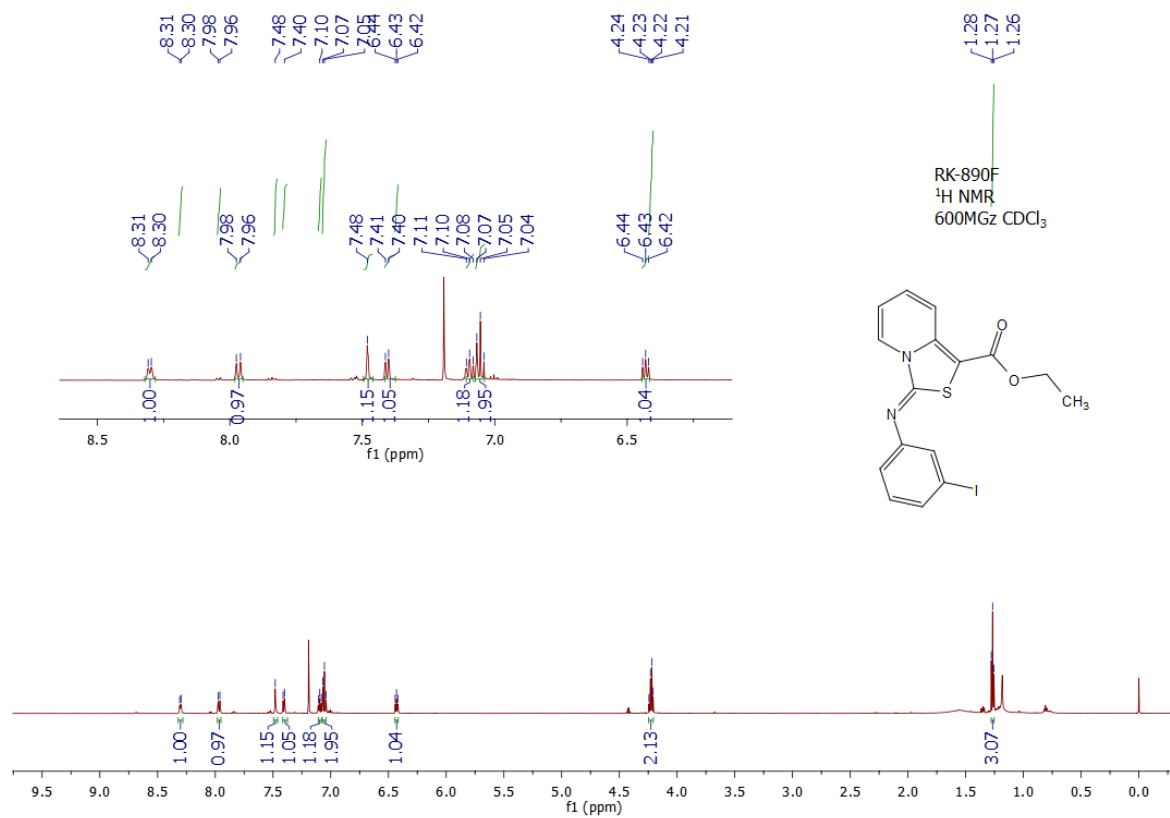

<sup>1</sup>H NMR of **3g**

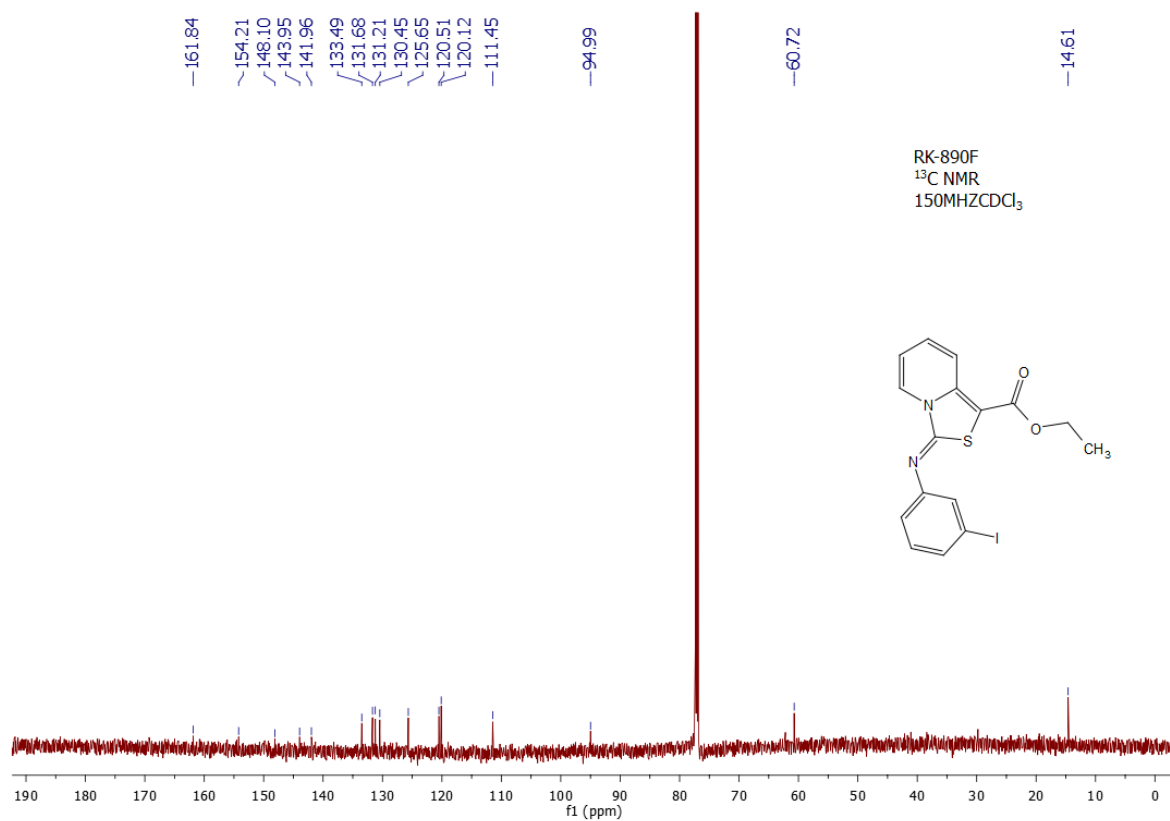

<sup>13</sup>C NMR of **3g**

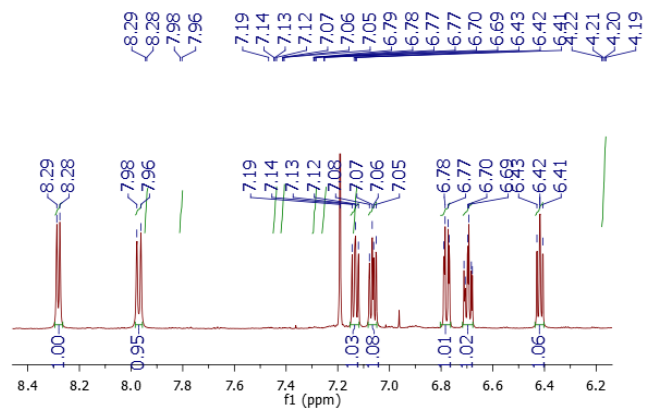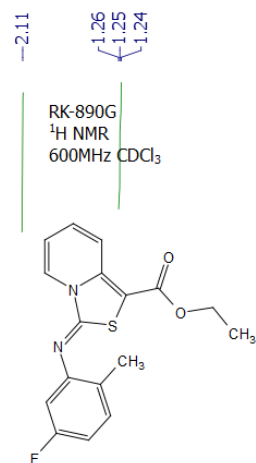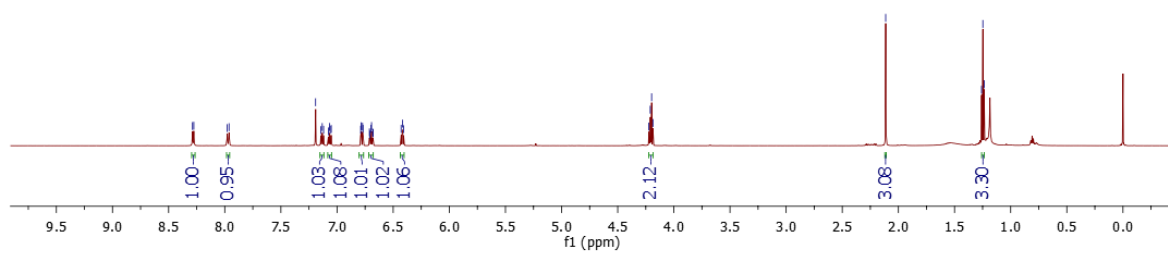

<sup>1</sup>H NMR of 3h

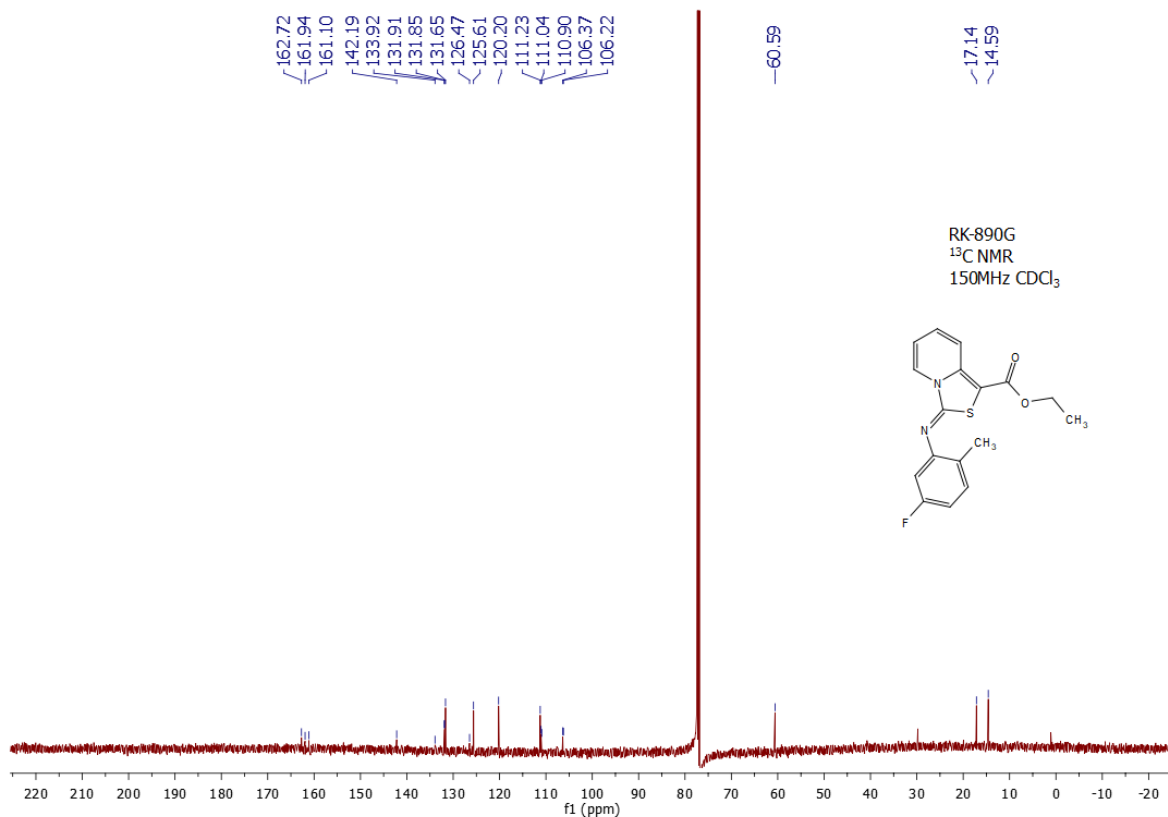

<sup>13</sup>C NMR of 3h

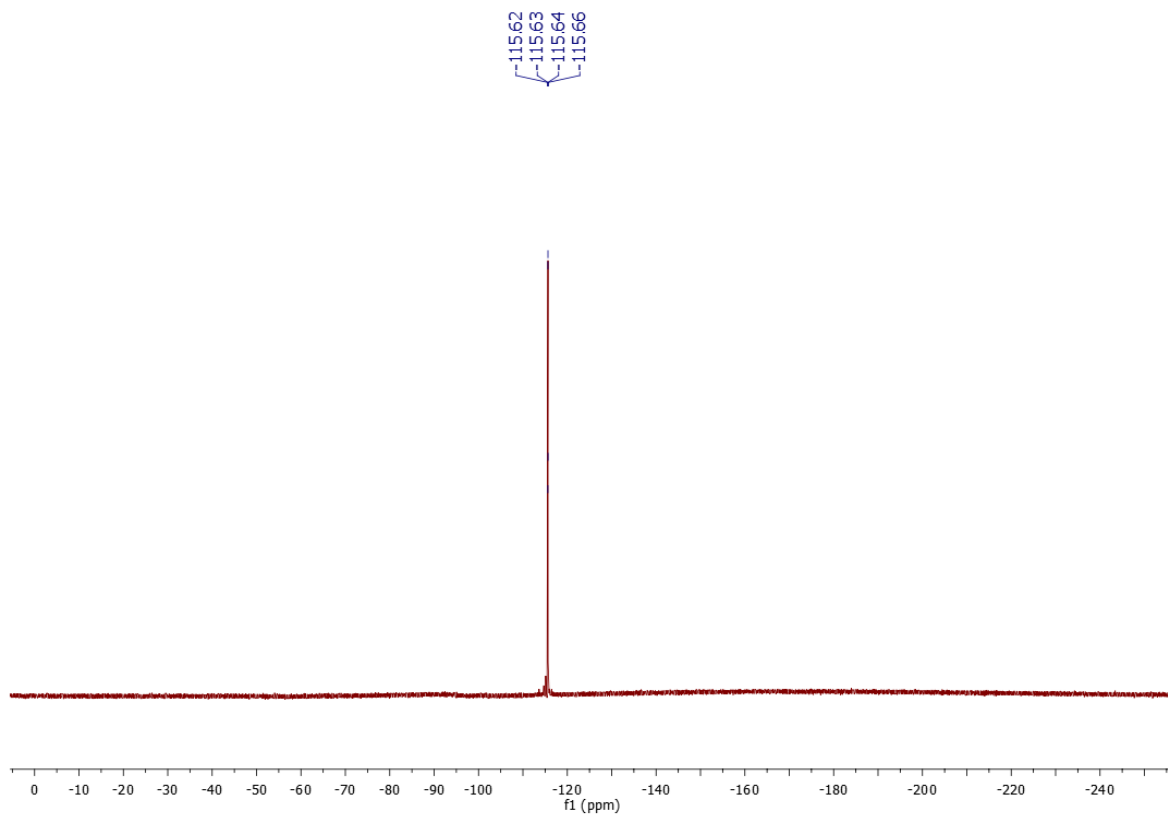

$^{19}\text{F}$  NMR of **3h**

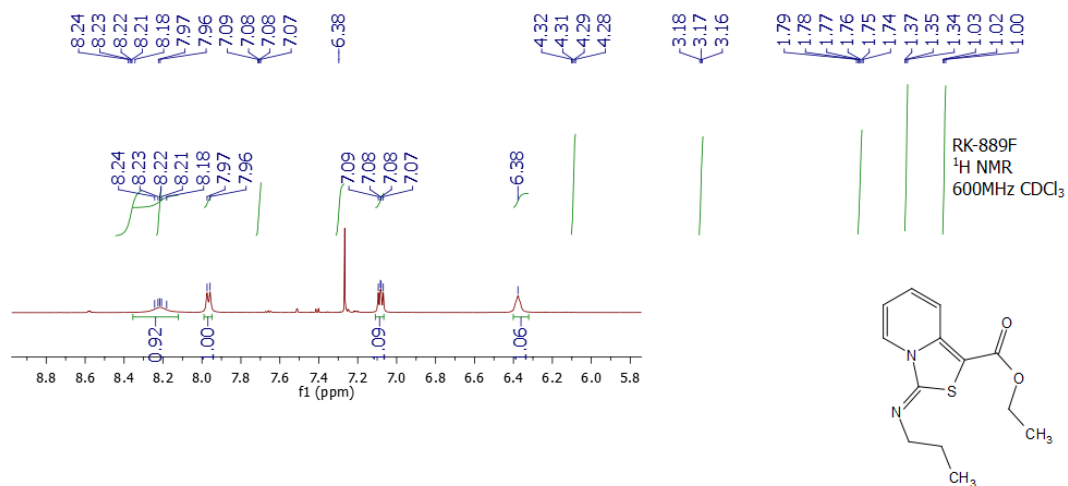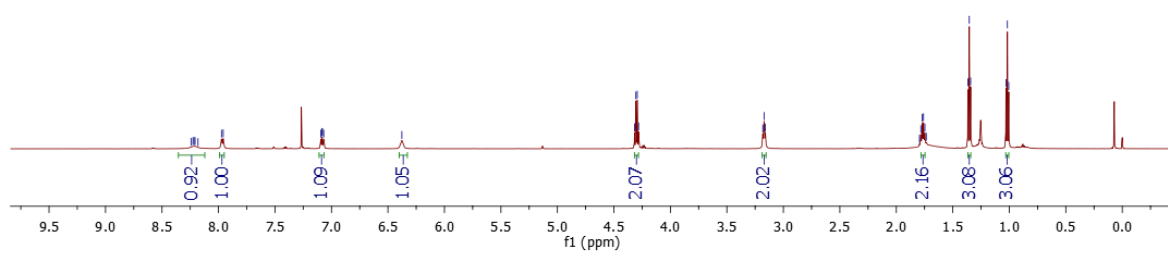

<sup>1</sup>H NMR of **3i**

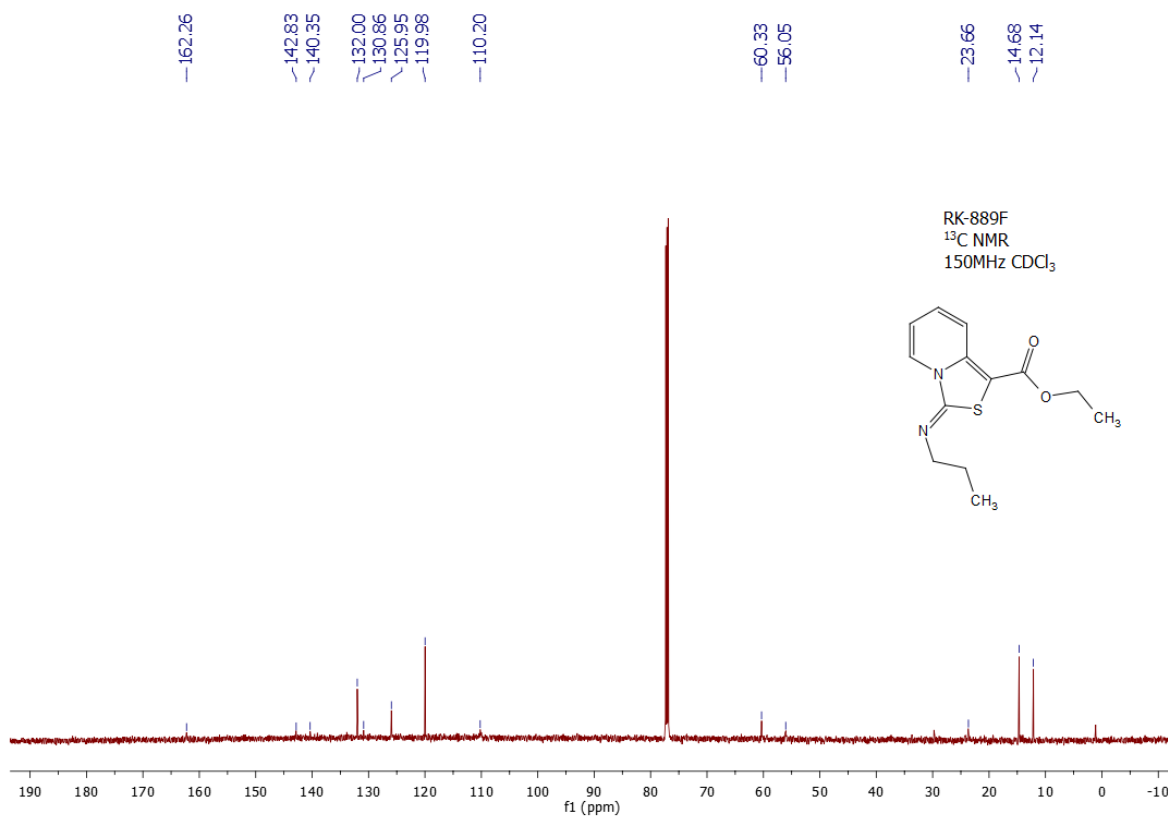

<sup>13</sup>C NMR of **3i**

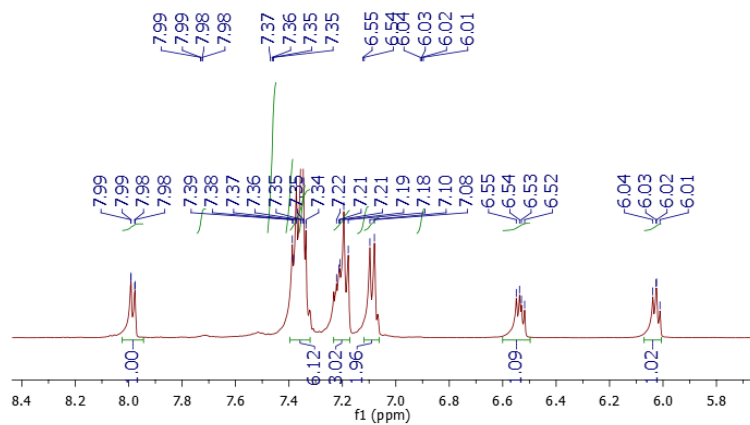

RK-845  
<sup>1</sup>H NMR  
 500MHz CDCl<sub>3</sub>

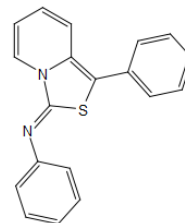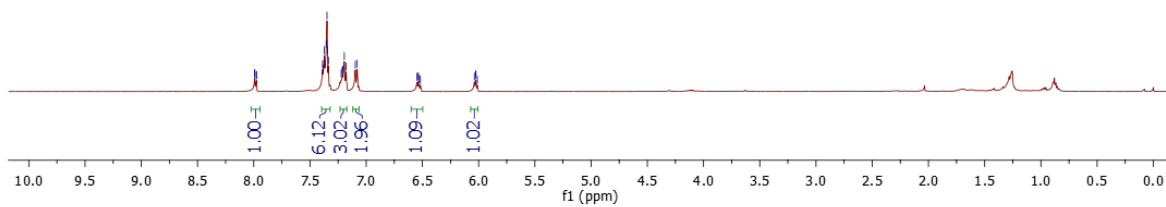

<sup>1</sup>H NMR of **5a**

Peak labels (ppm): 152.40, 149.17, 129.69, 128.50, 127.88, 126.45, 125.59, 124.09, 122.42, 120.10, 117.39, 99.52.

RK-845  
<sup>13</sup>C NMR  
 125MHz CDCl<sub>3</sub>

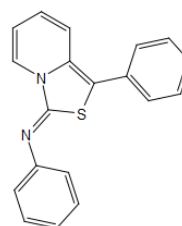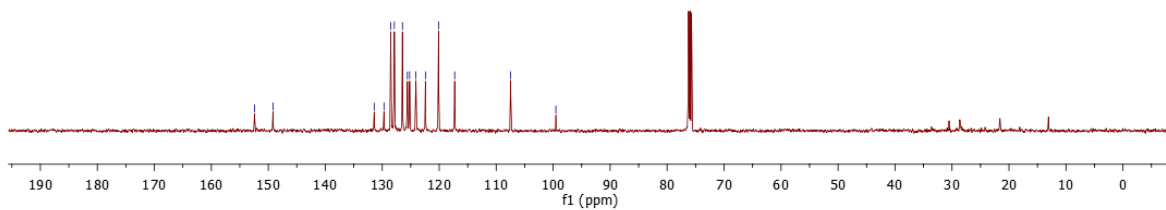

<sup>13</sup>C NMR of **5a**

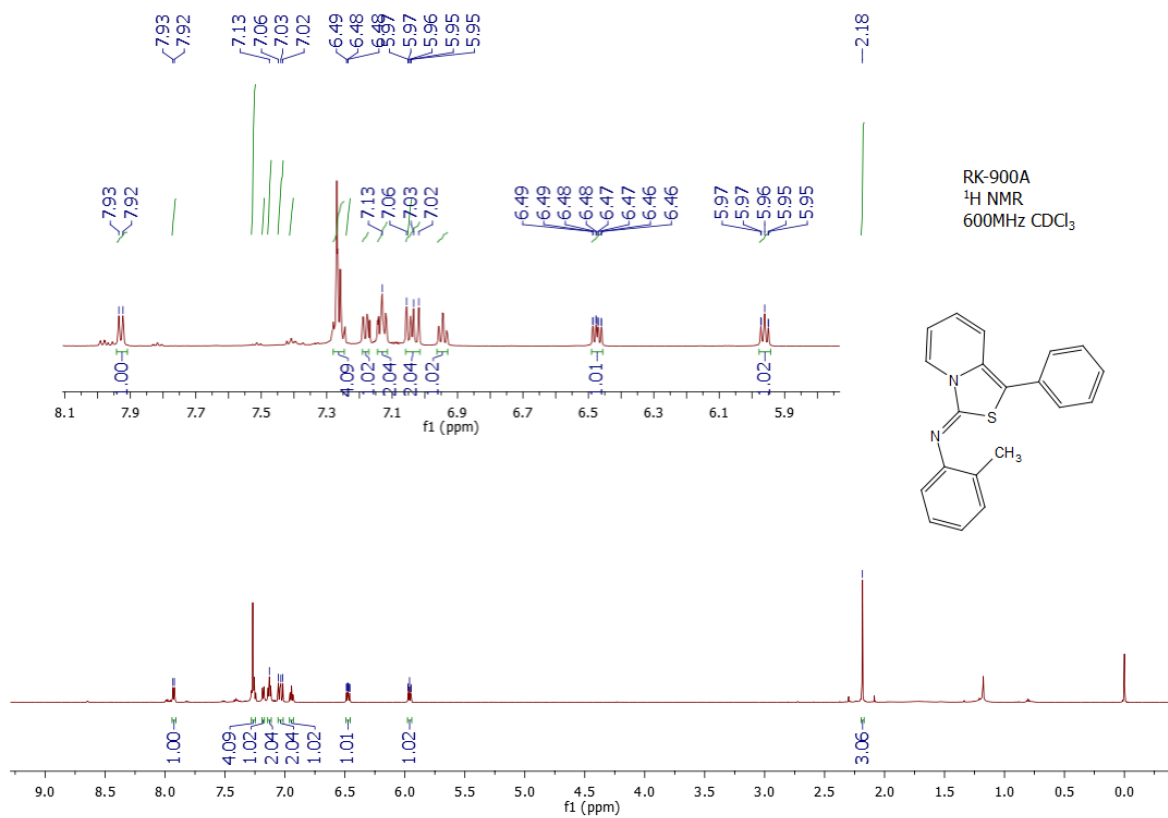

<sup>1</sup>H NMR of **5b**

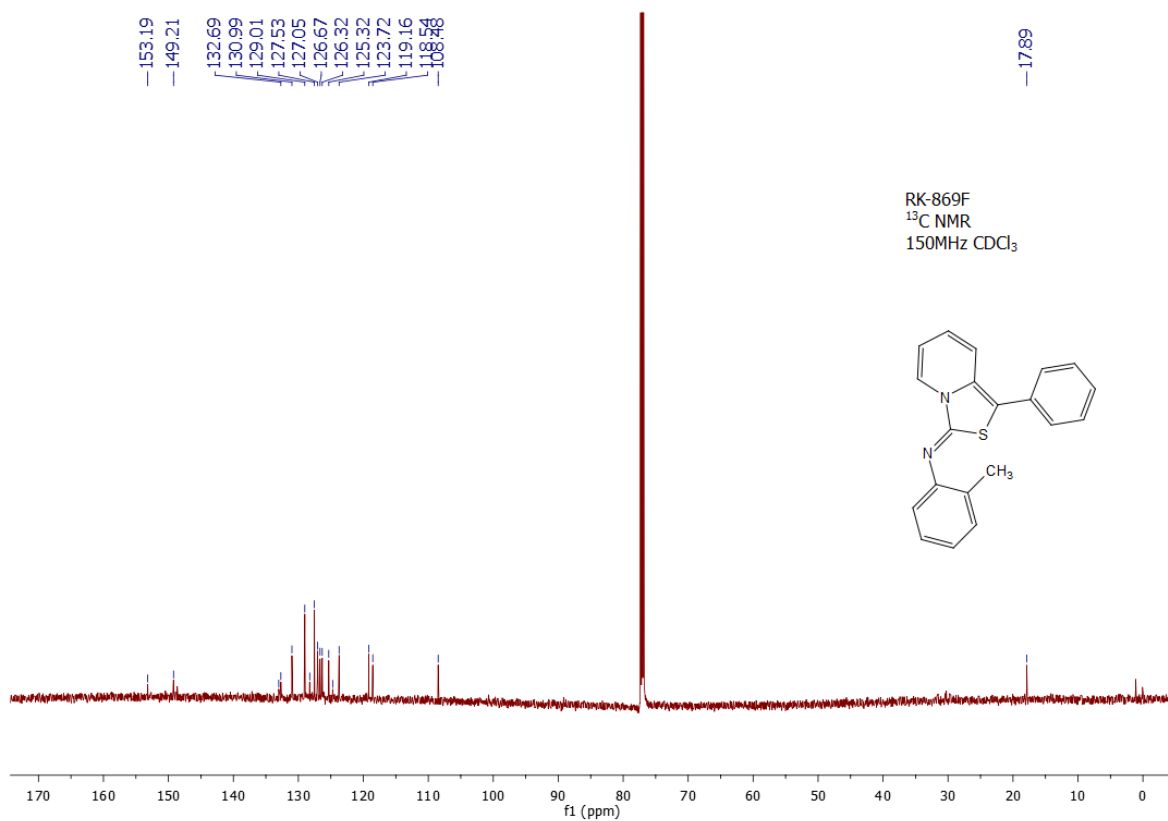

<sup>13</sup>C NMR of **5b**

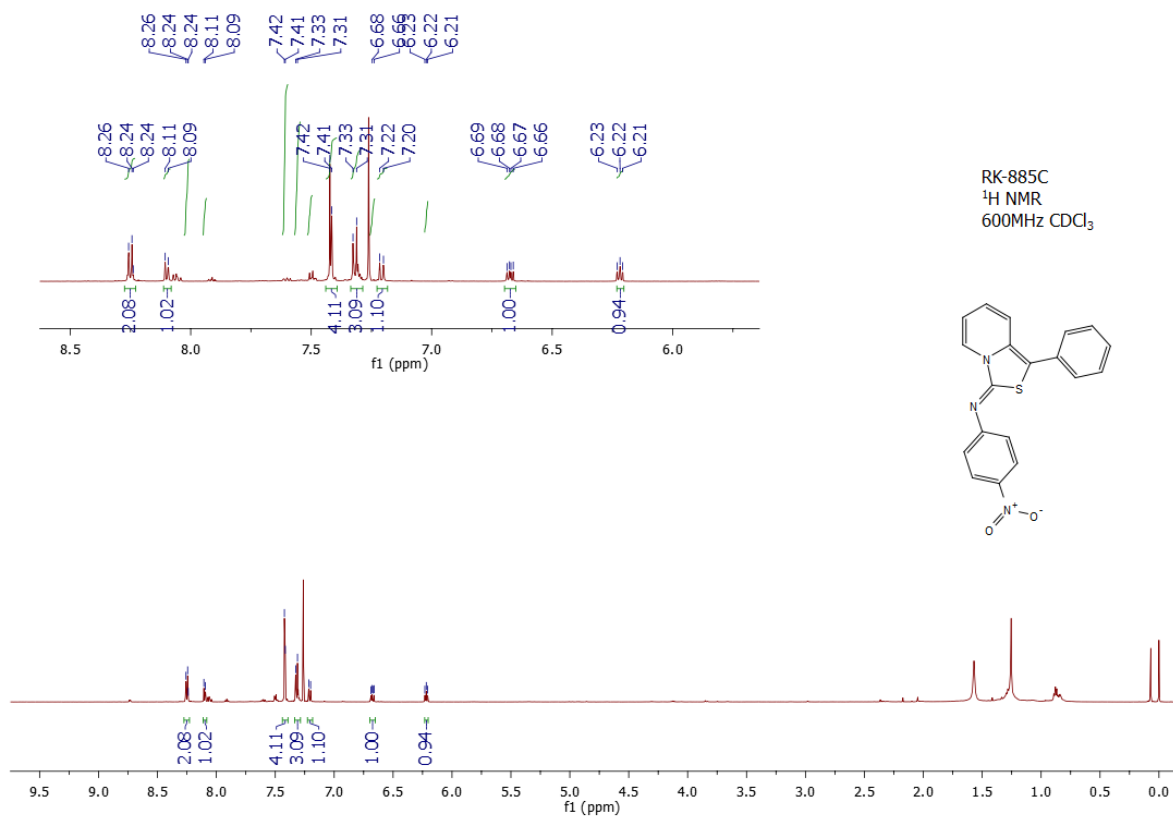

<sup>1</sup>H NMR of 5c

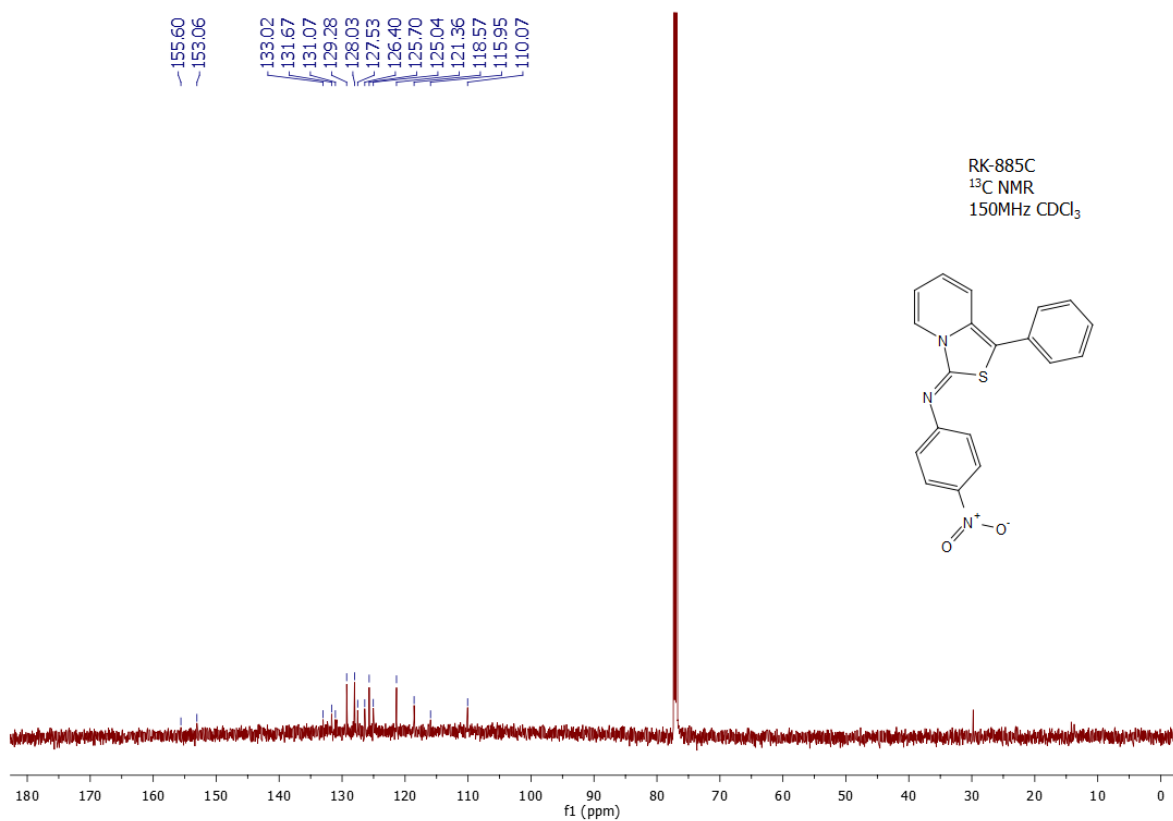

<sup>13</sup>C NMR of 5c



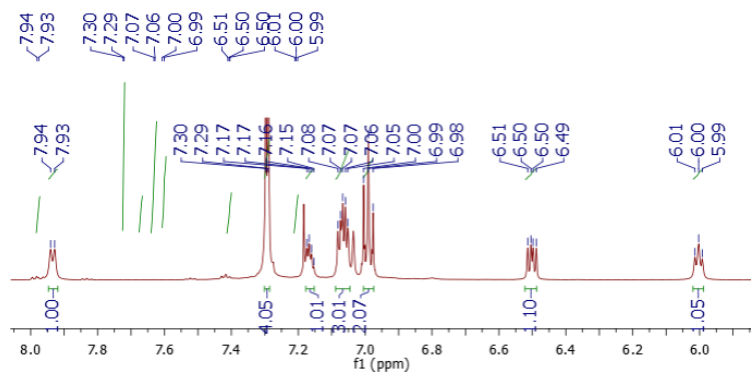

RK-885B  
<sup>1</sup>H NMR  
 600MHz CDCl<sub>3</sub>

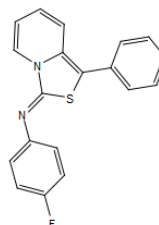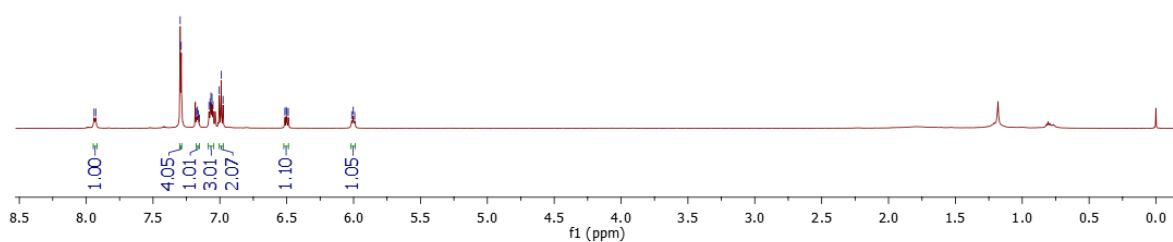

<sup>1</sup>H NMR of **5d**

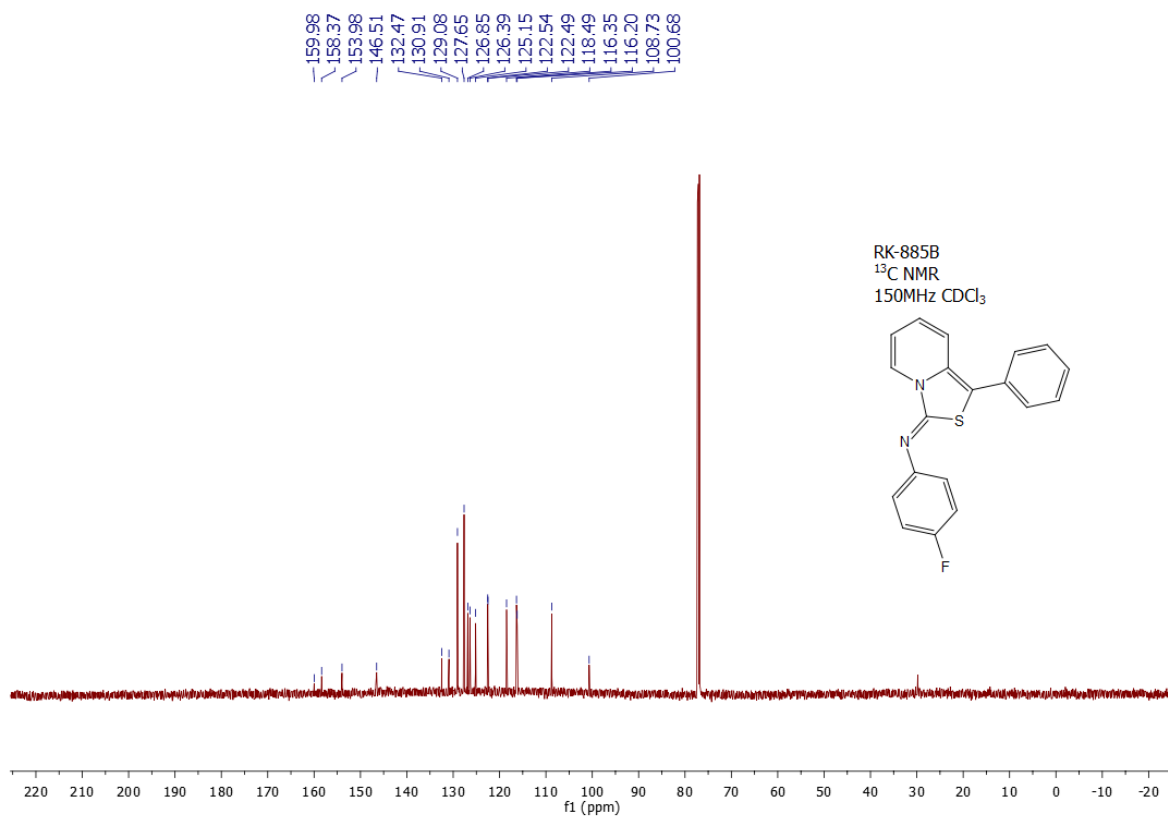

RK-885B  
<sup>13</sup>C NMR  
 150MHz CDCl<sub>3</sub>

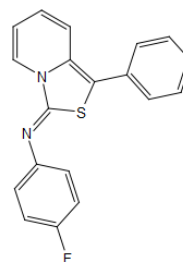

<sup>13</sup>C NMR of **5d**

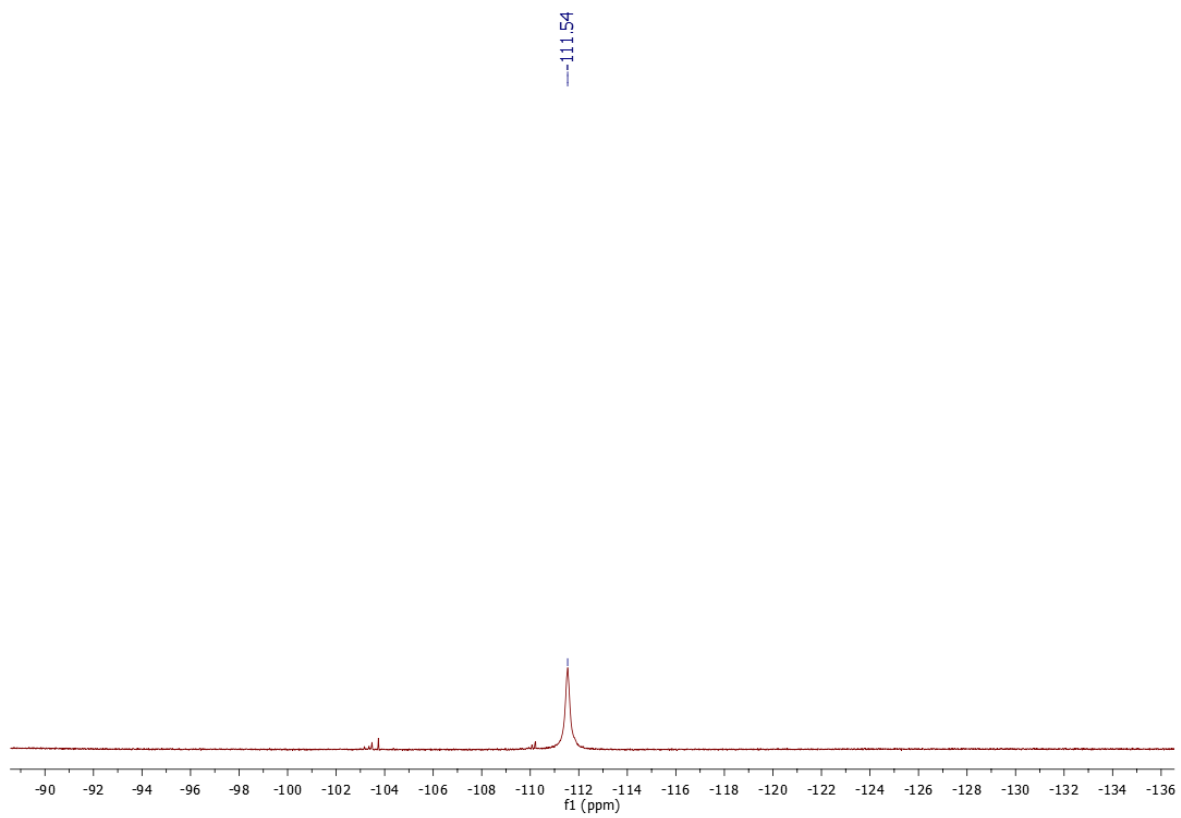

$^{19}\text{F}$  NMR of **5d**

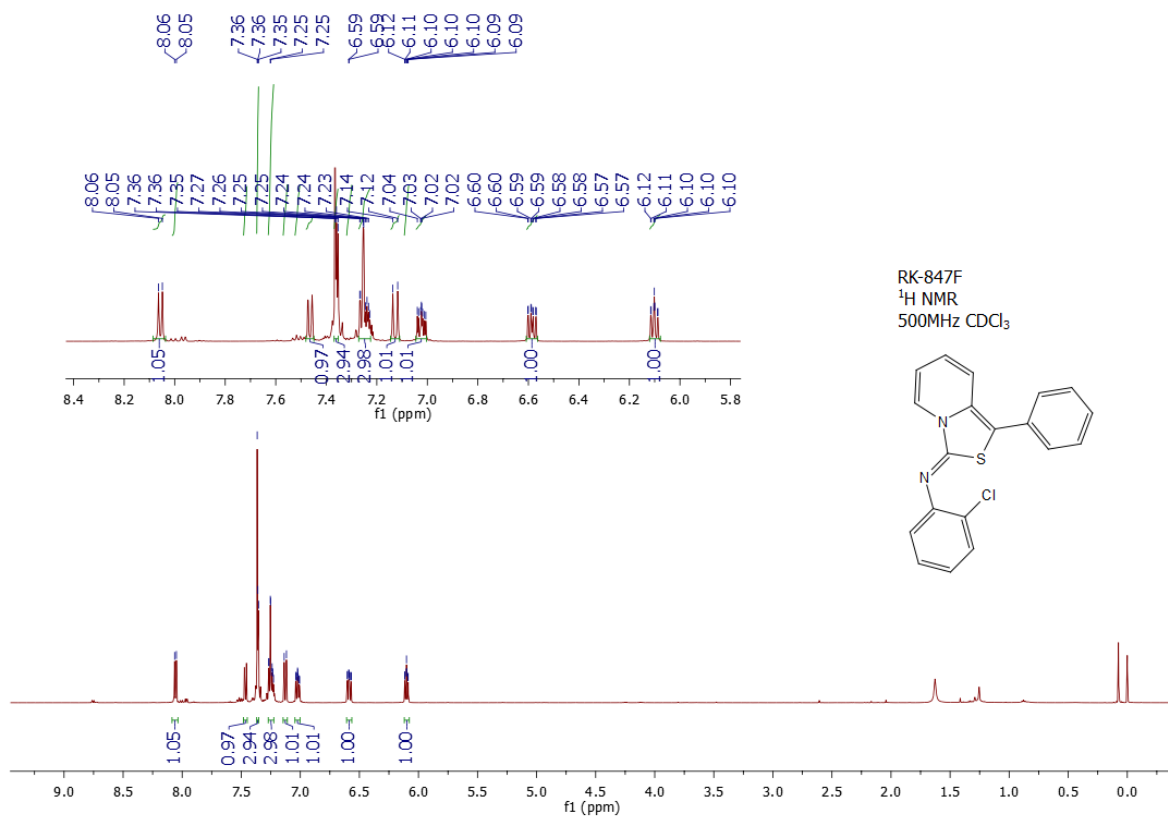

RK-847F  
<sup>1</sup>H NMR  
 500MHz CDCl<sub>3</sub>

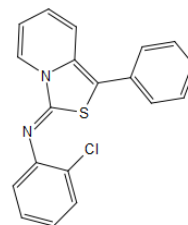

<sup>1</sup>H NMR of **5e**

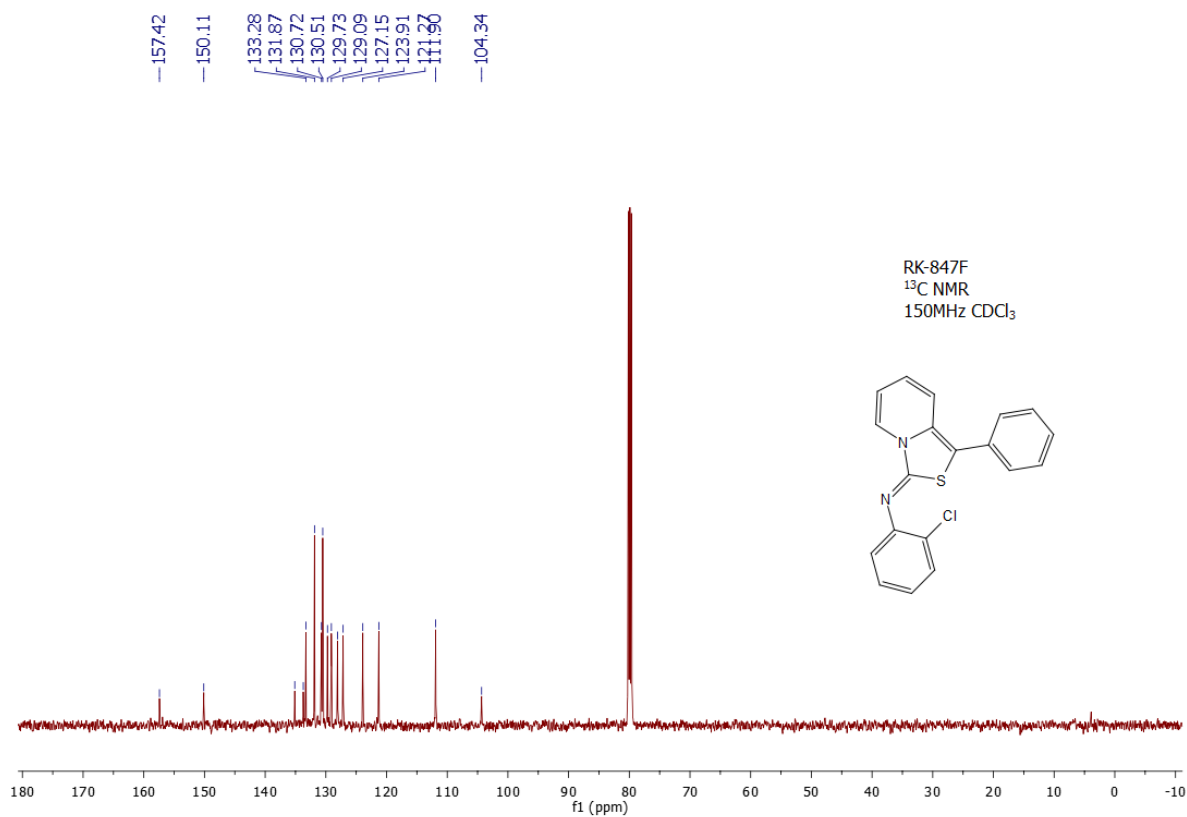

RK-847F  
<sup>13</sup>C NMR  
 150MHz CDCl<sub>3</sub>

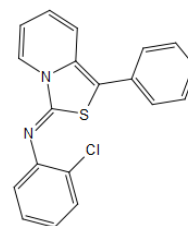

<sup>13</sup>C NMR of **5e**

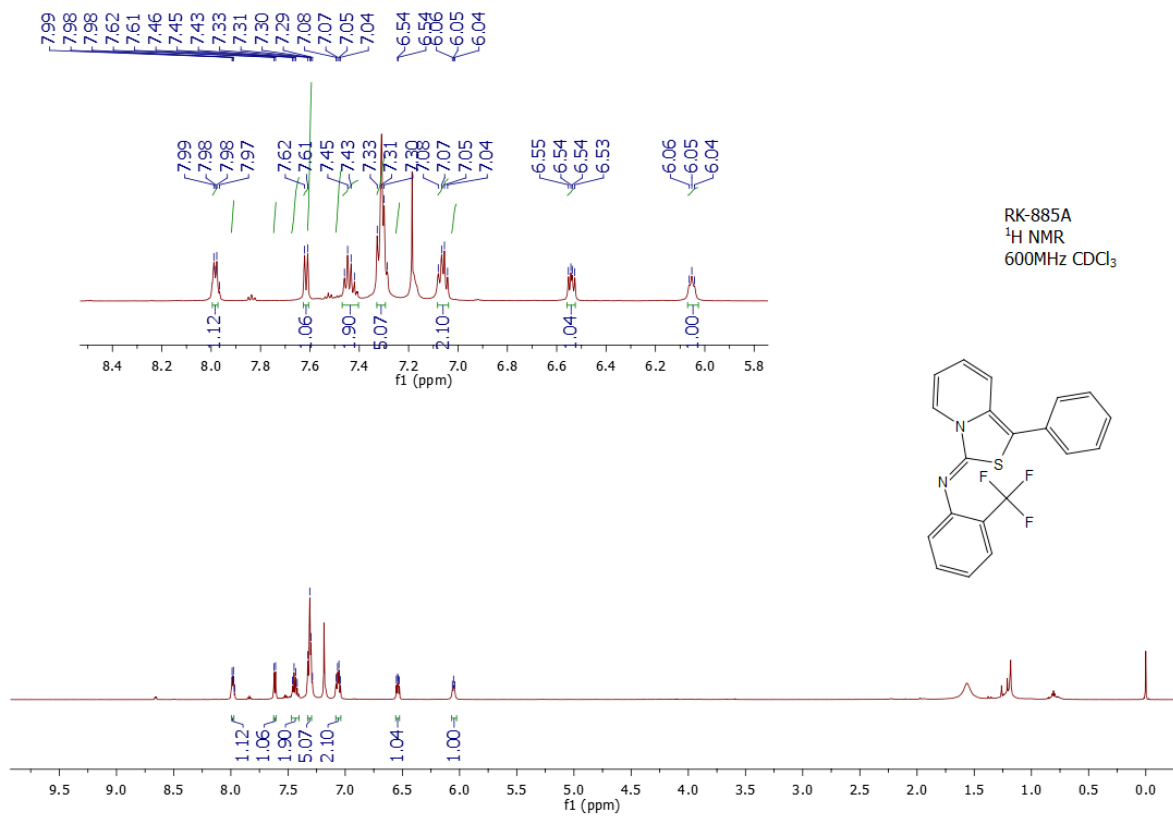

<sup>1</sup>H NMR of **5f**

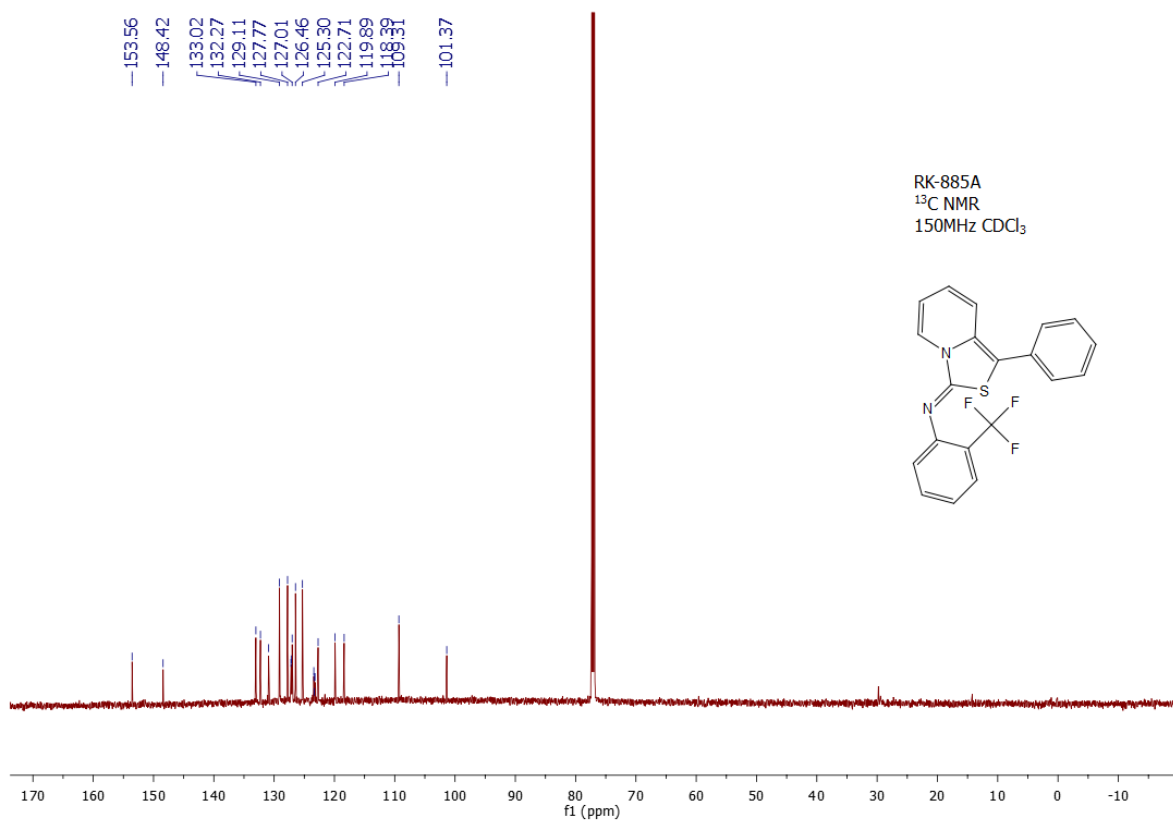

<sup>13</sup>C NMR of **5f**

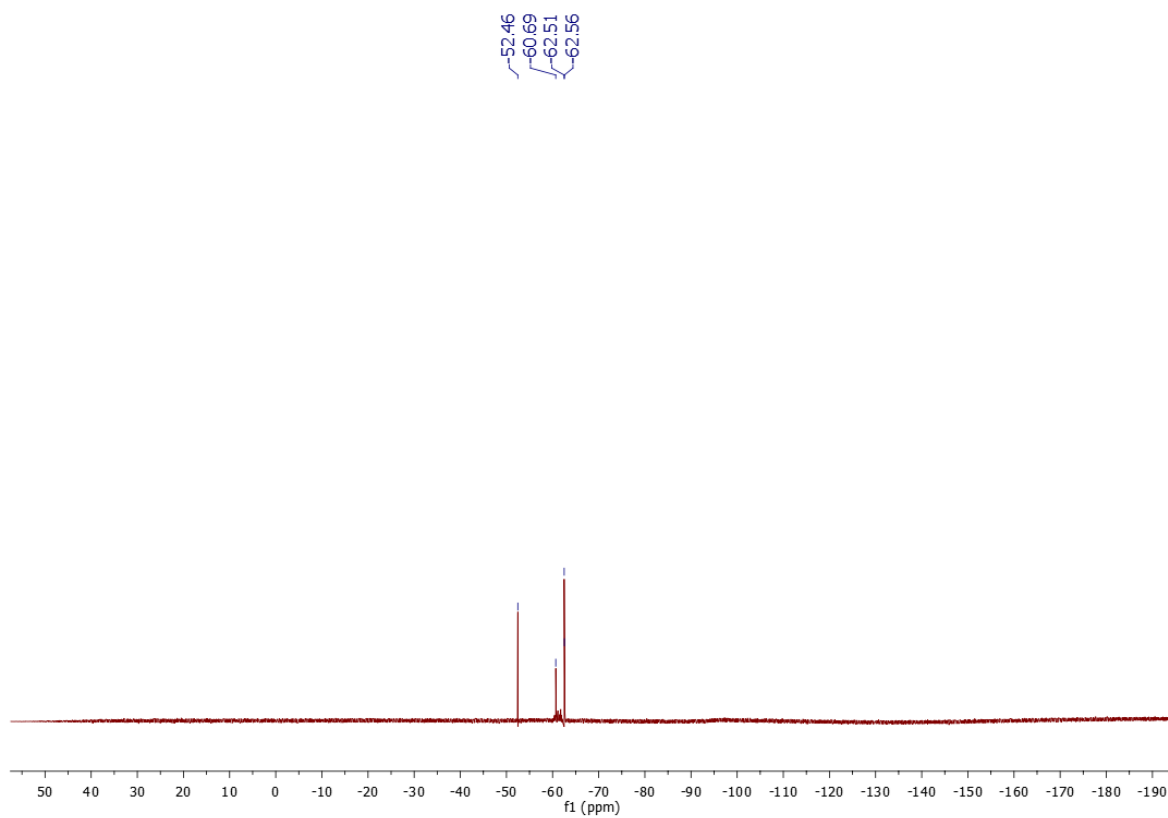

$^{19}\text{F}$  NMR of **5f**

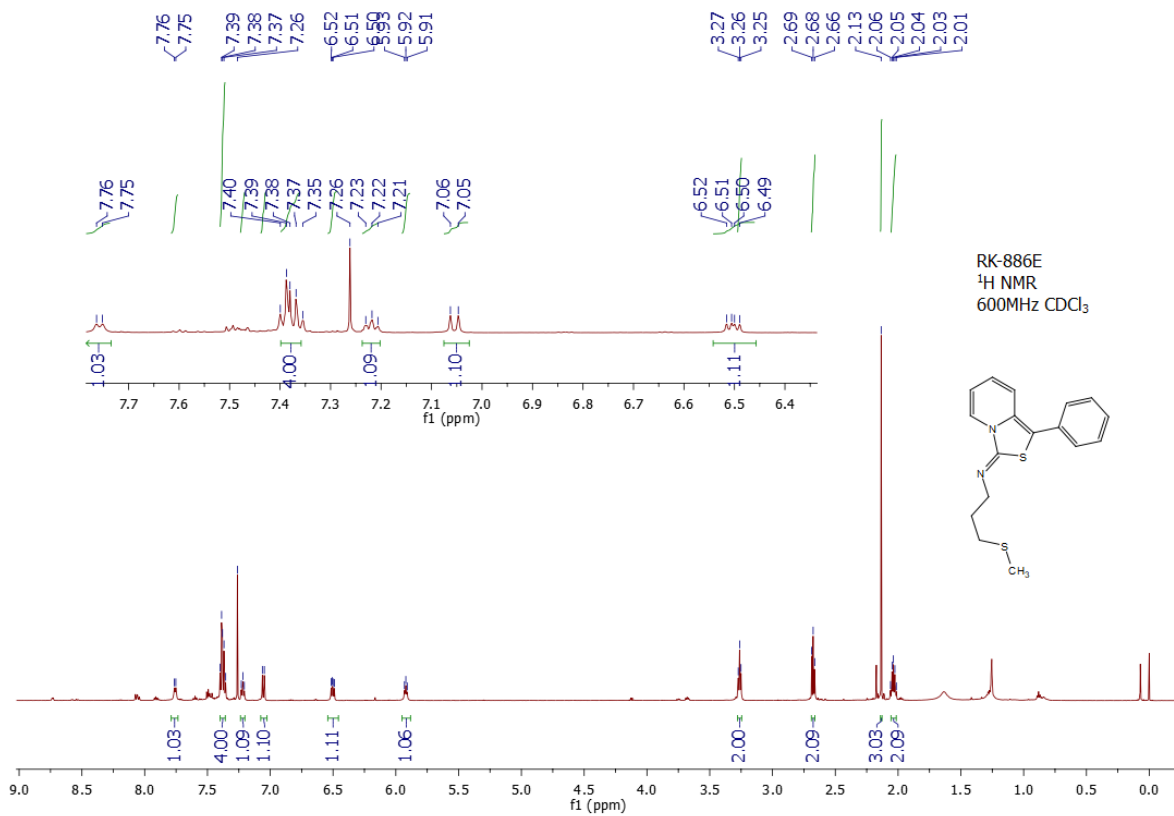

<sup>1</sup>H NMR of **5g**

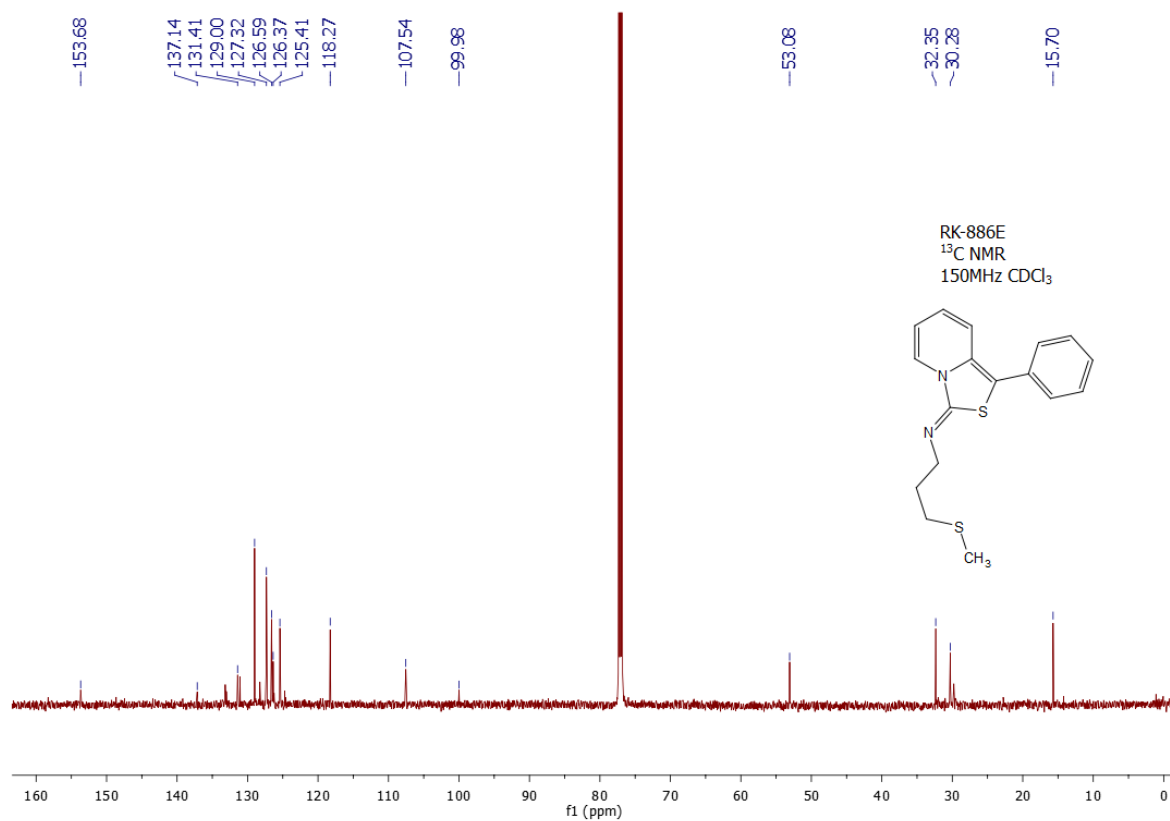

<sup>13</sup>C NMR of **5g**

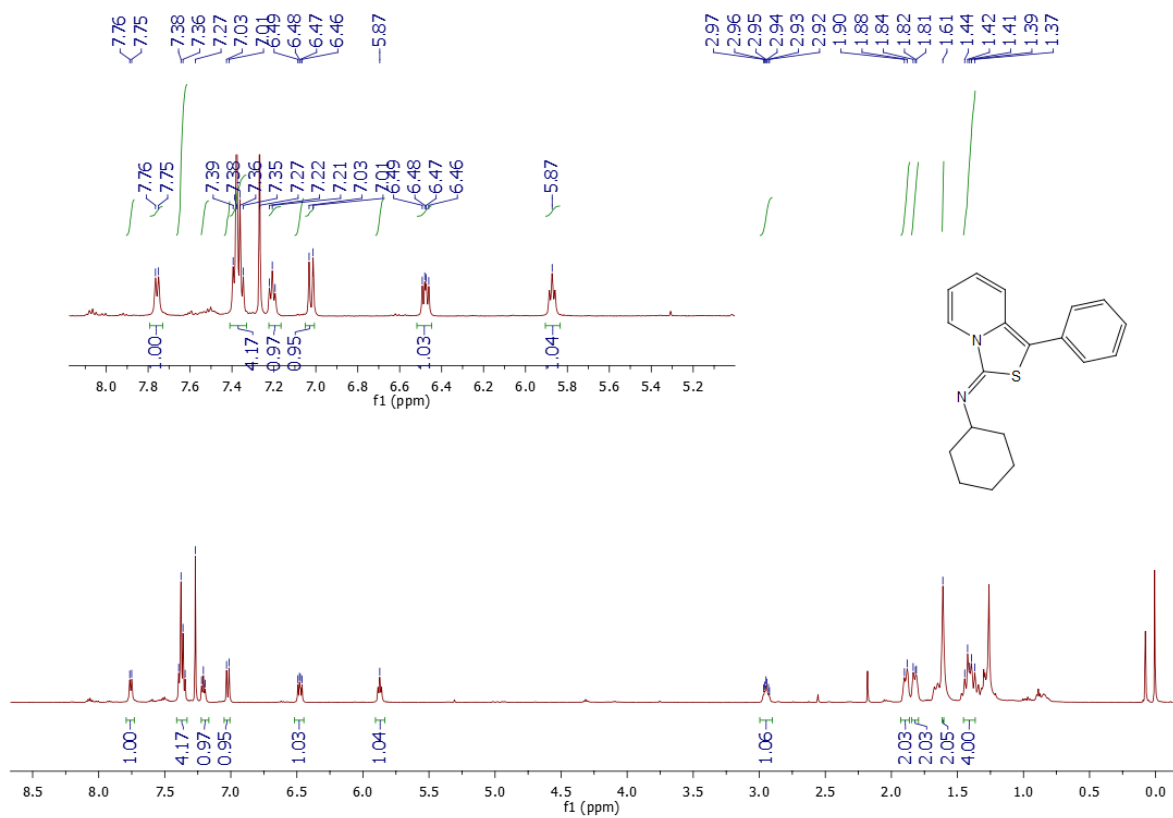

**<sup>1</sup>H NMR of 5h**

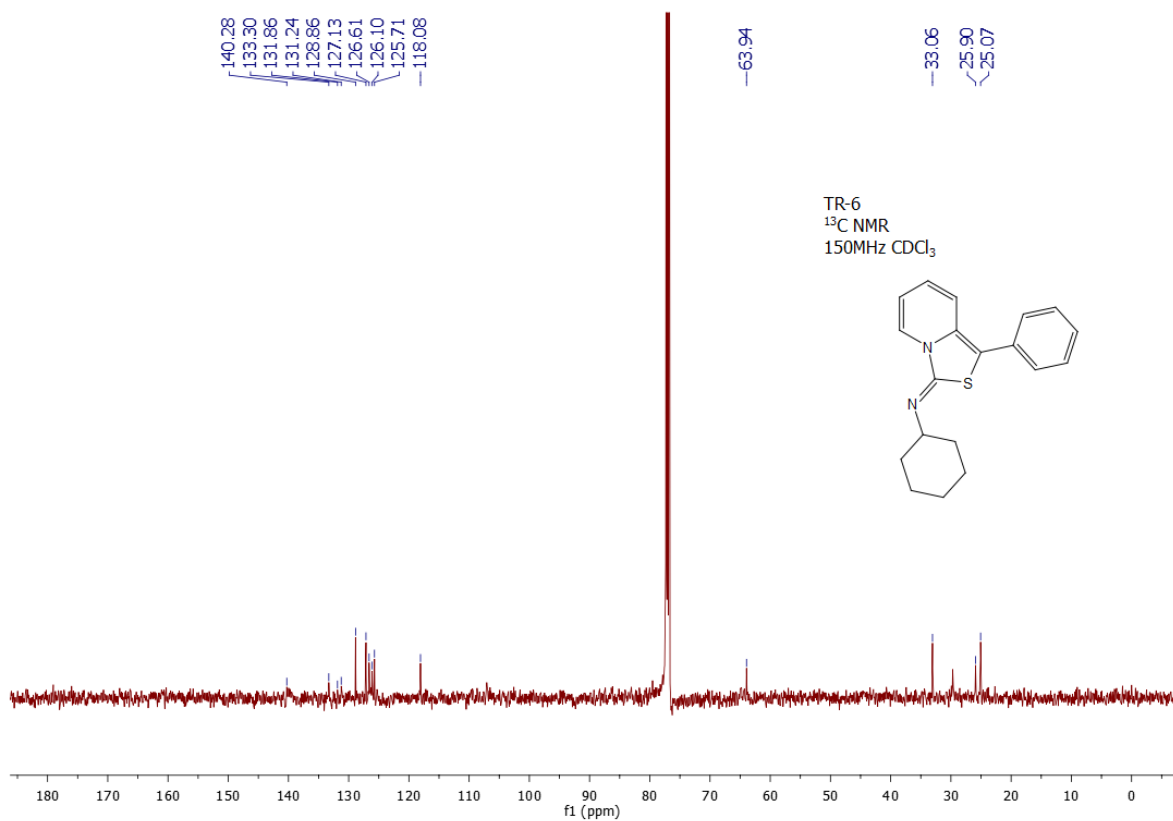

**<sup>13</sup>C NMR of 5h**

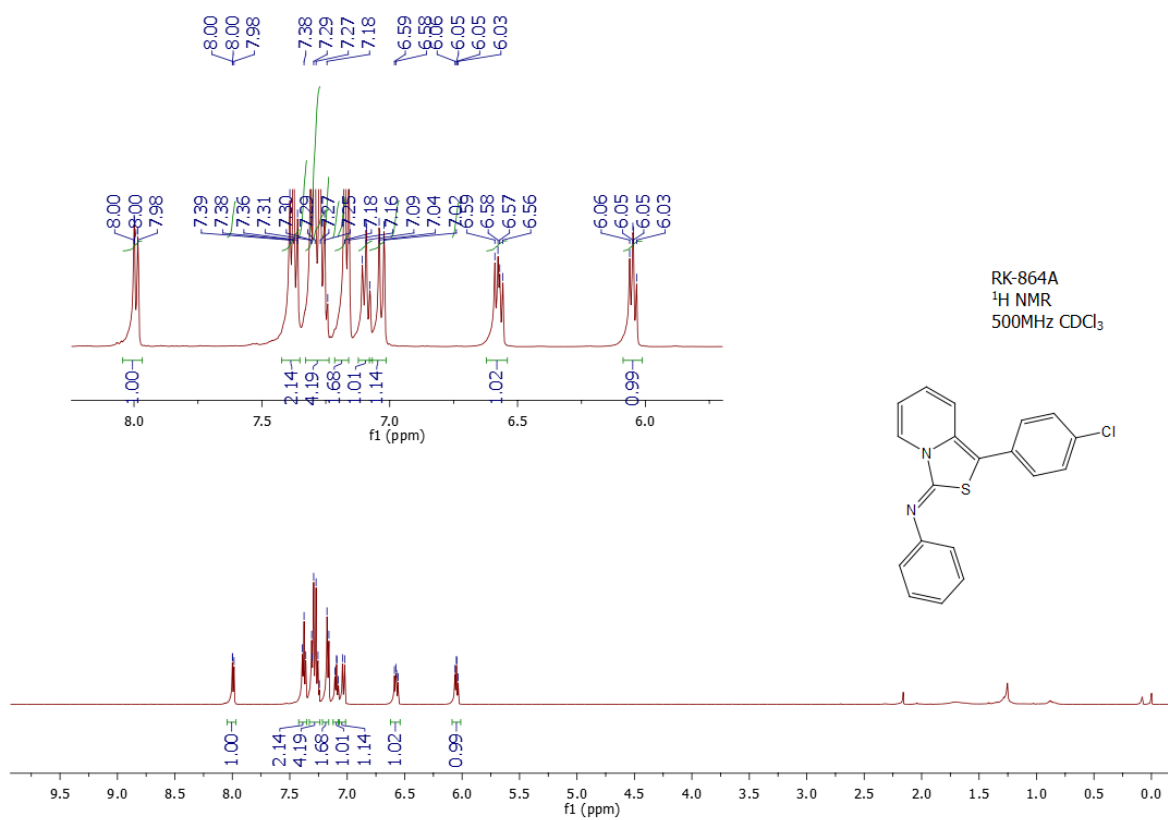

<sup>1</sup>H NMR of **5i**

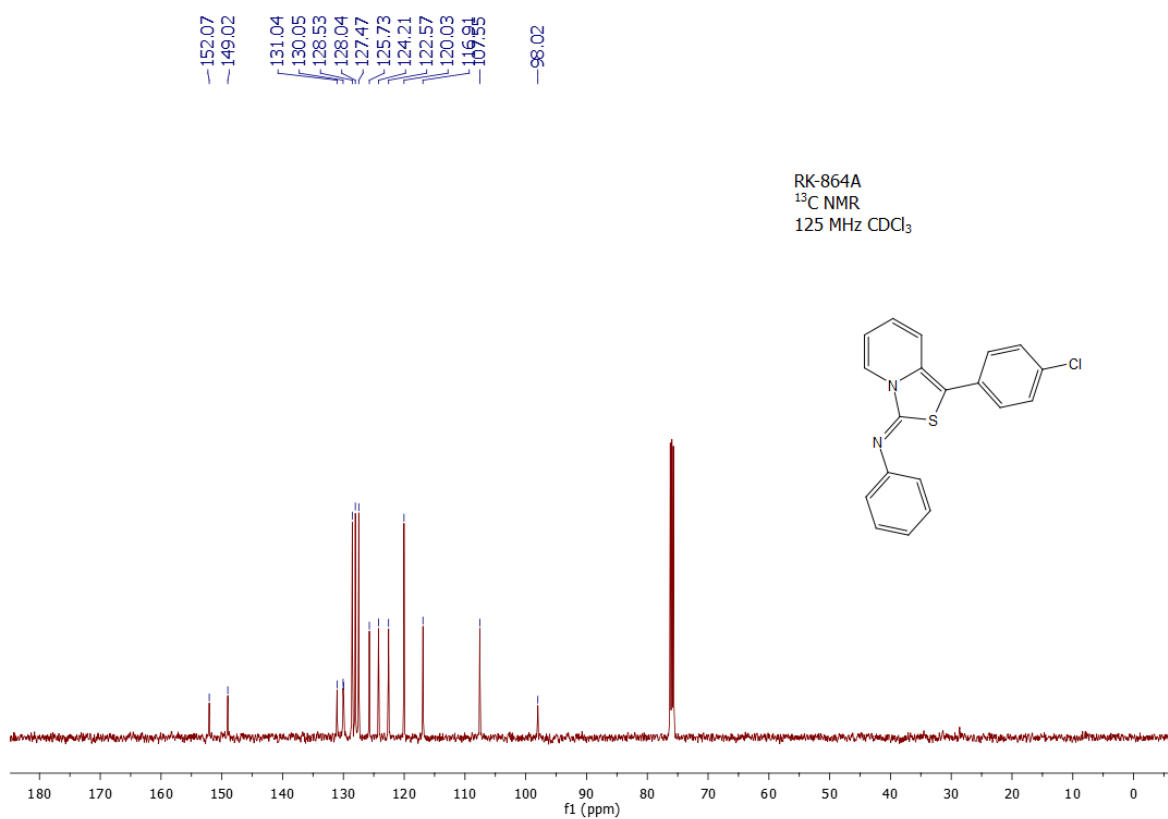

<sup>13</sup>C NMR of **5i**



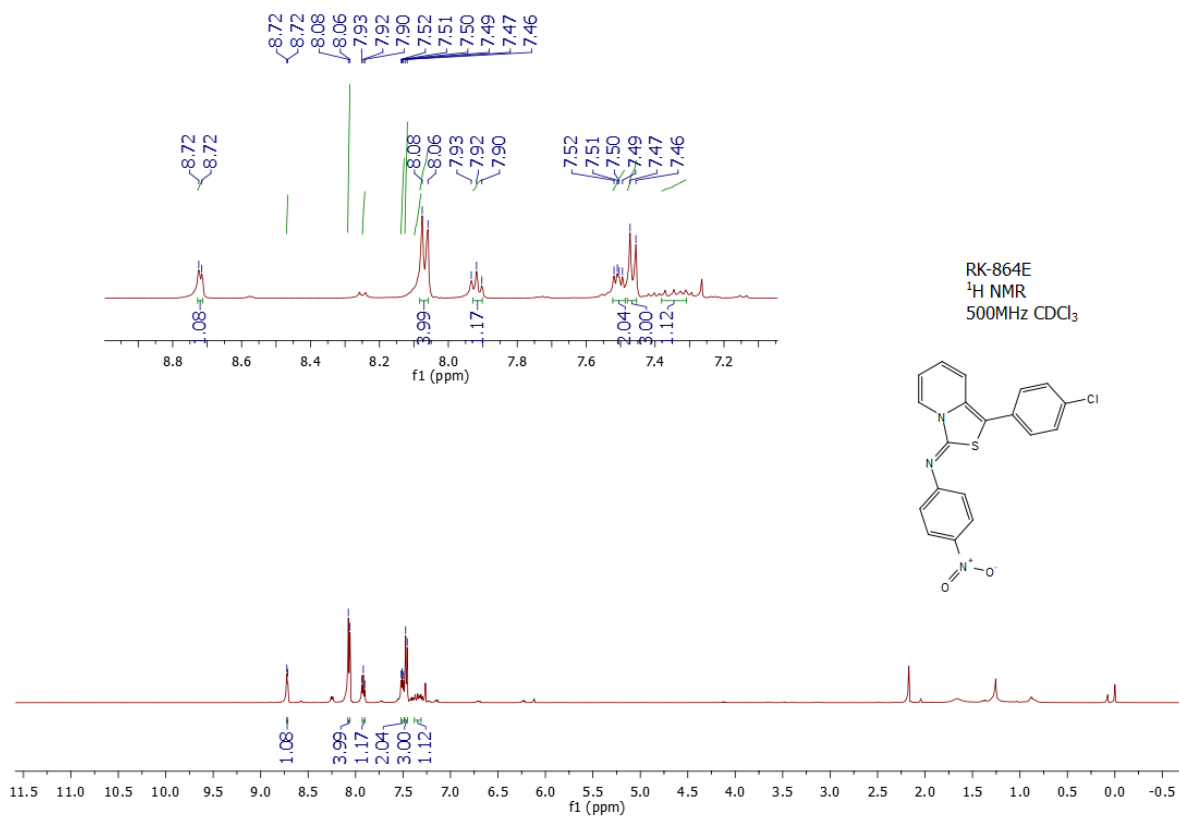

<sup>1</sup>H NMR of **5j**

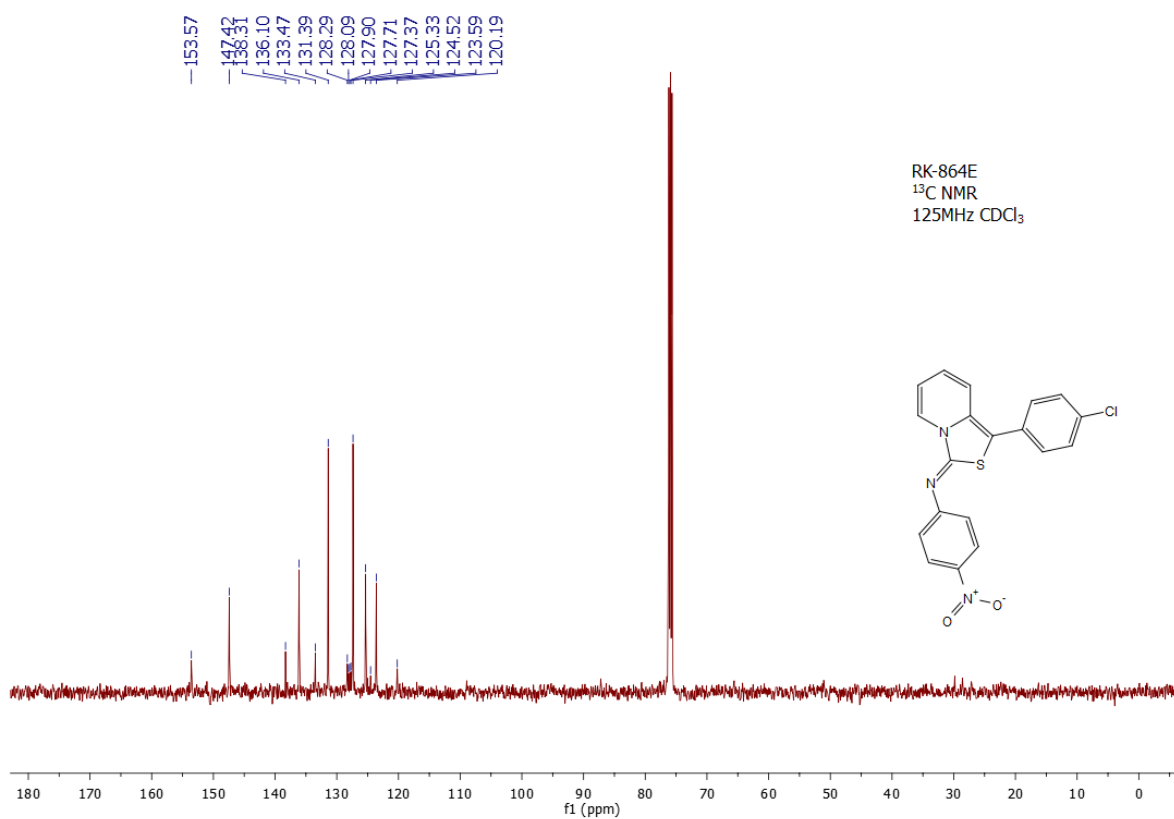

<sup>13</sup>C NMR of **5j**

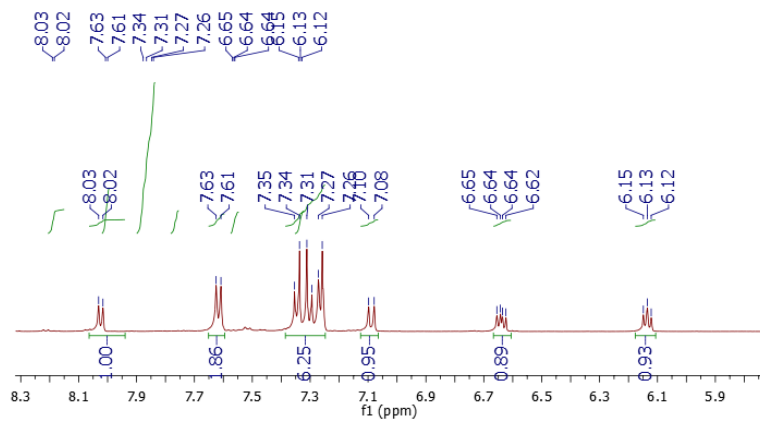

RK-865D  
<sup>1</sup>H NMR  
 500MHz CDCl<sub>3</sub>

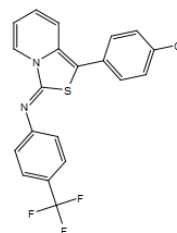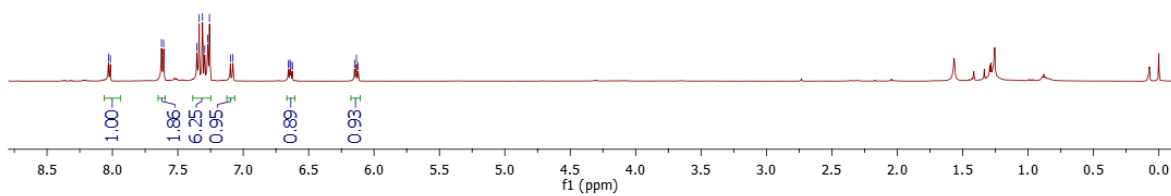

<sup>1</sup>H NMR of **5k**

RK-865D  
<sup>13</sup>C NMR  
 125MHz CDCl<sub>3</sub>

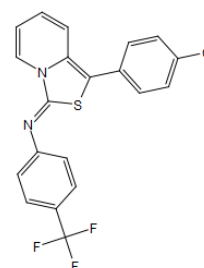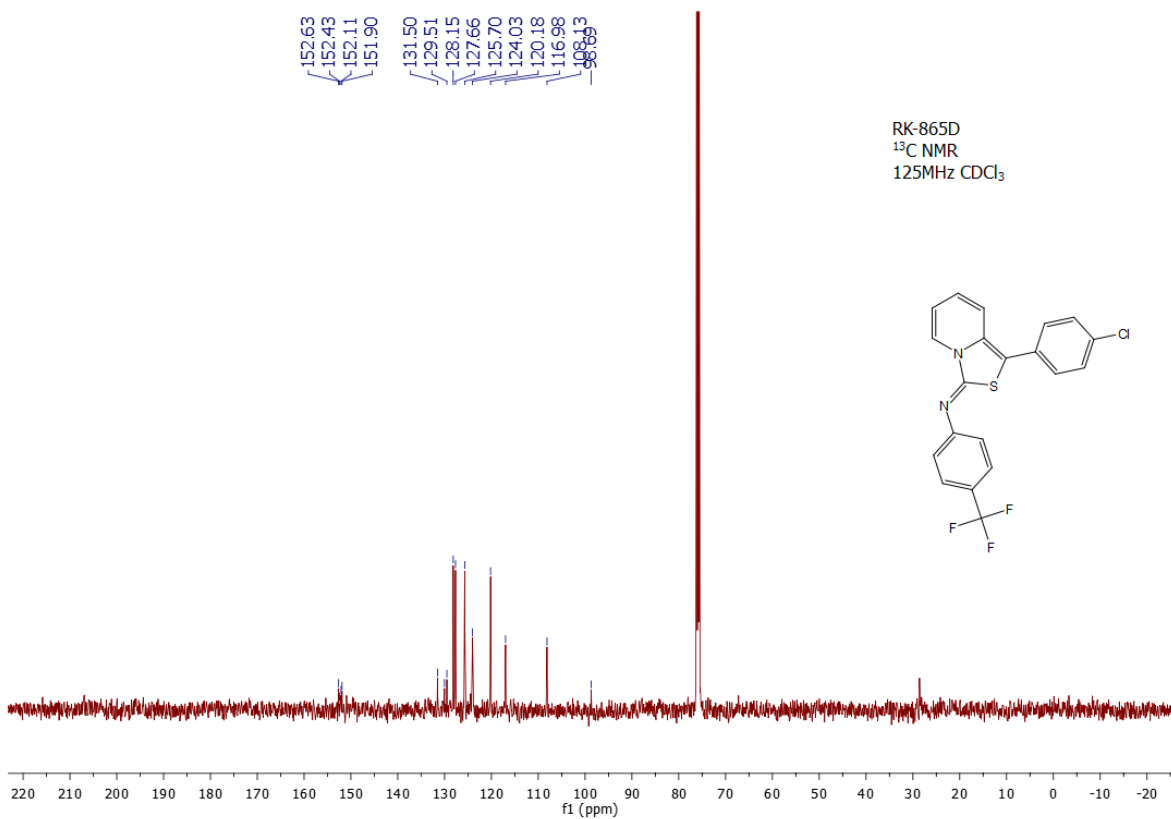

<sup>13</sup>C NMR of **5k**

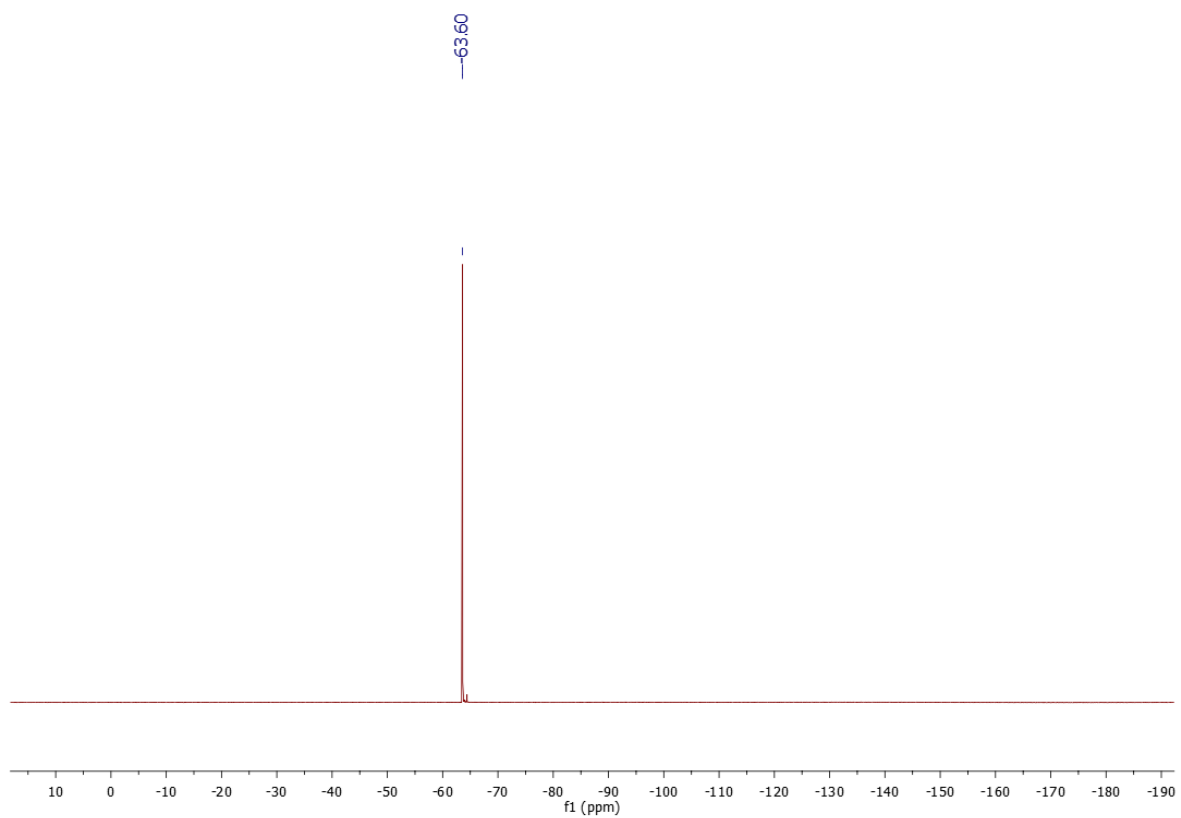

$^{19}\text{F}$  NMR of **5k**

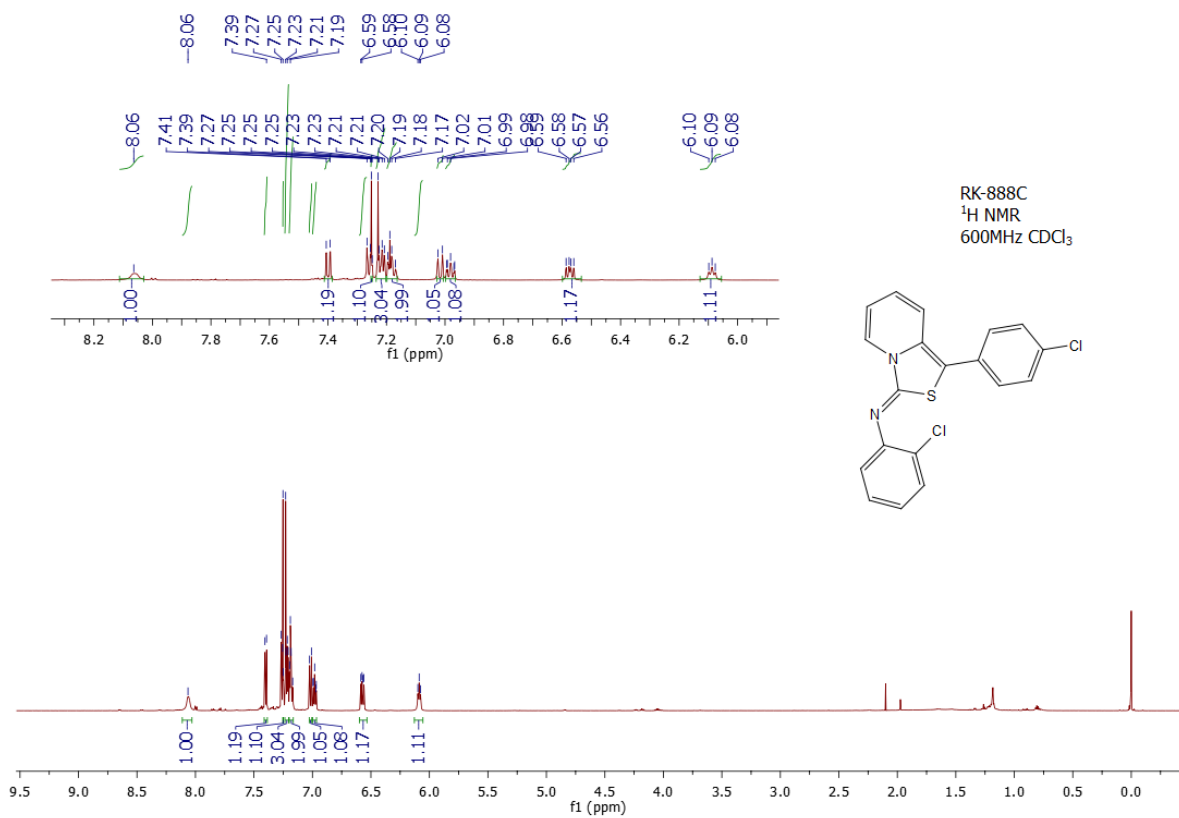

<sup>1</sup>H NMR of **51**

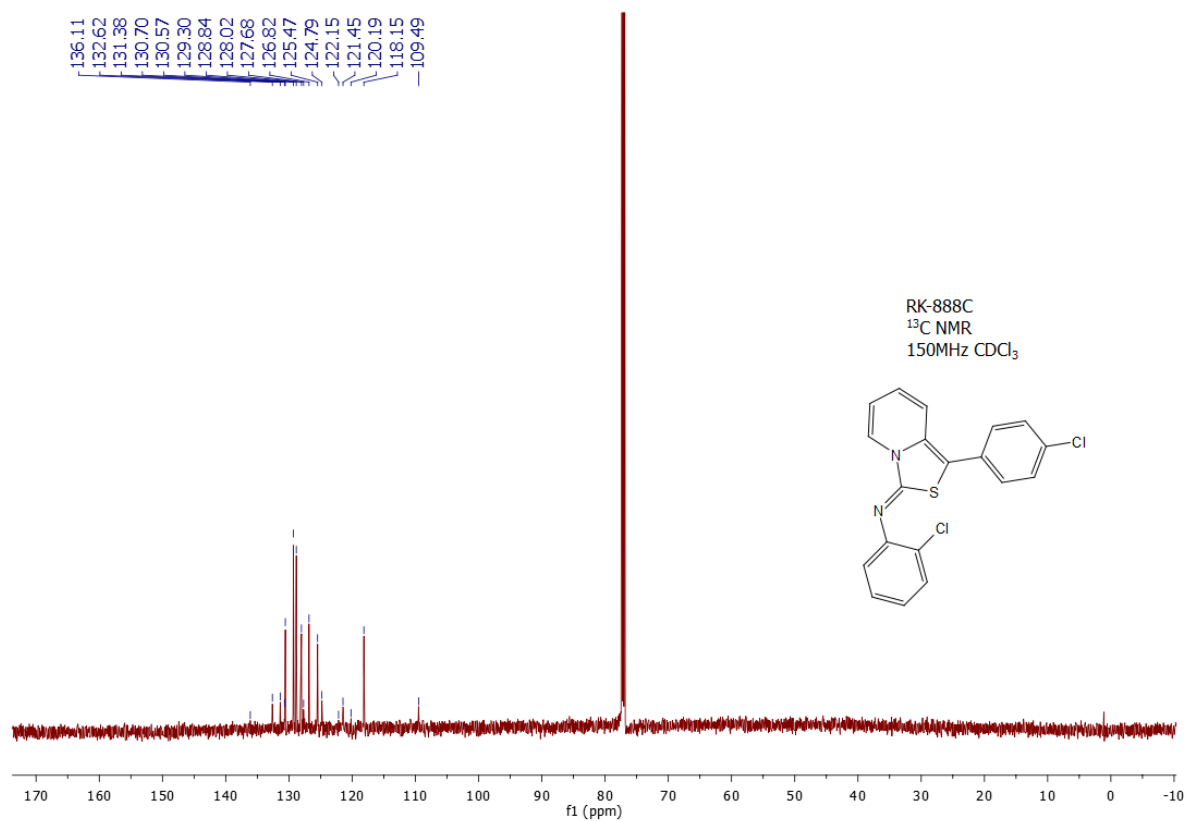

<sup>13</sup>C NMR of **51**

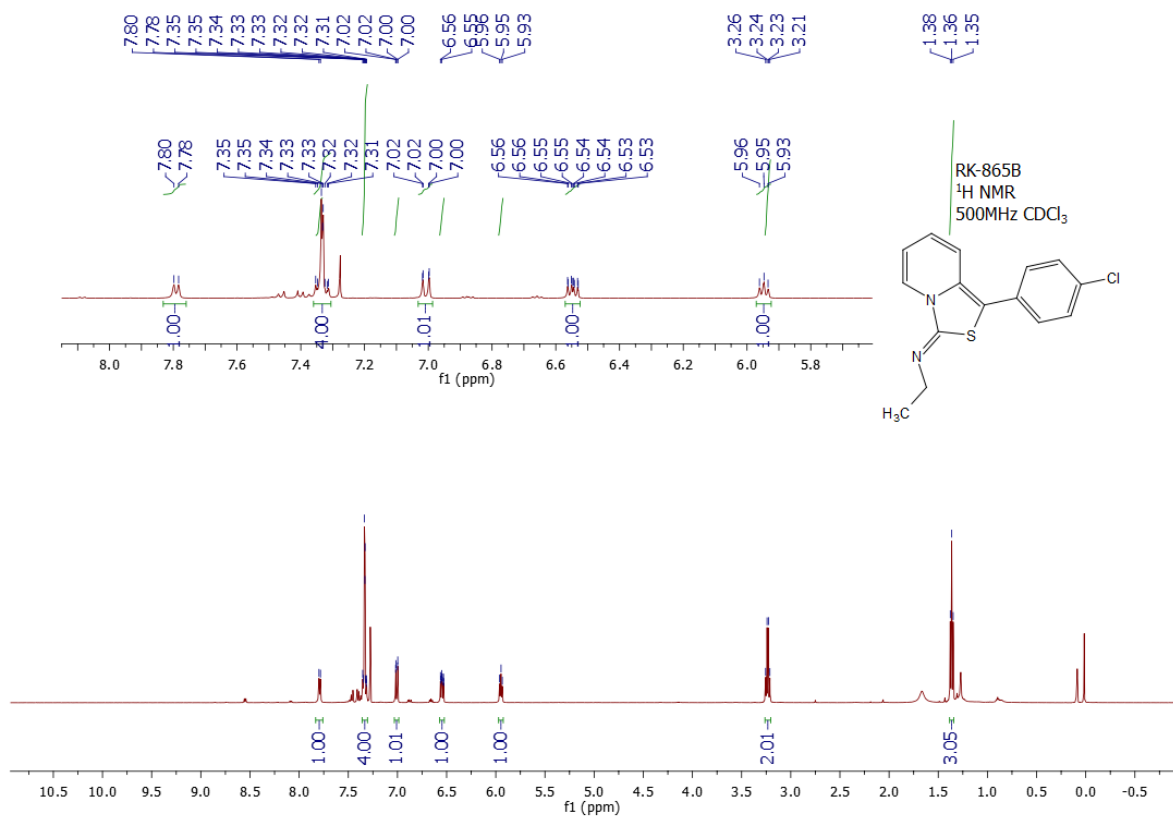

**<sup>1</sup>H NMR of 5m**

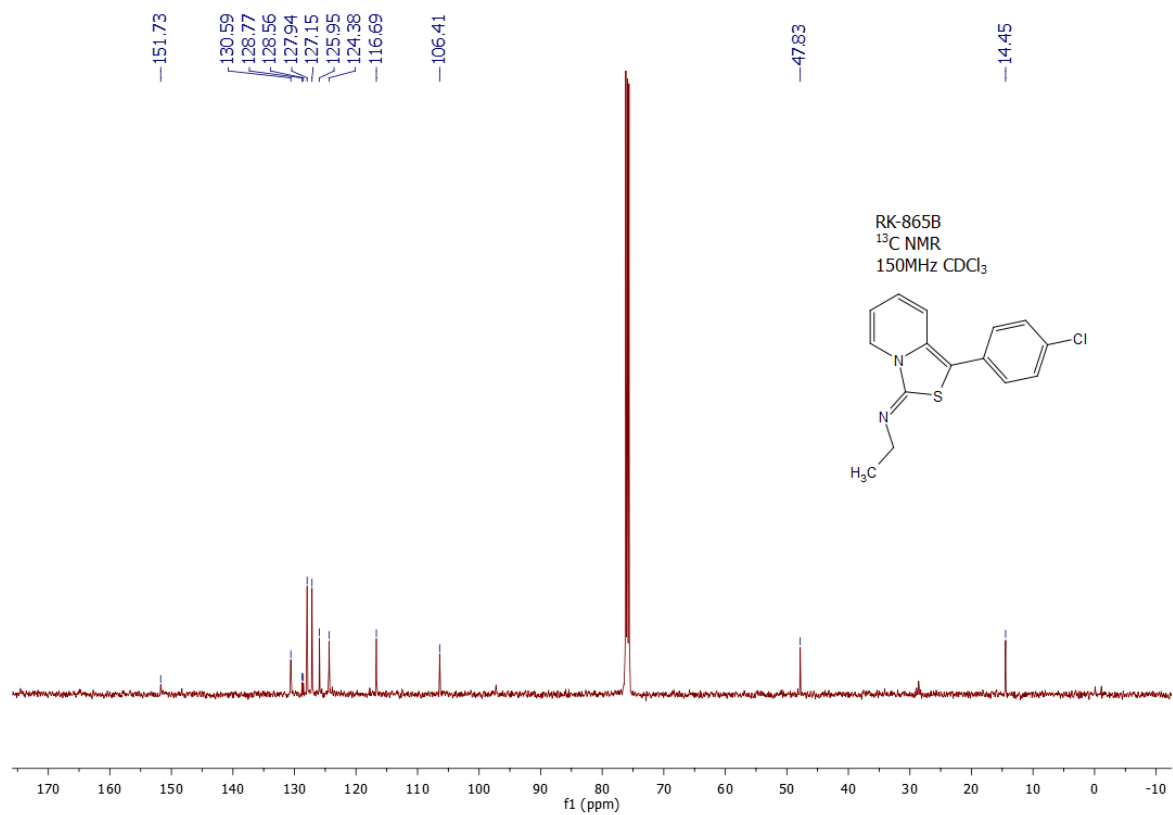

**<sup>13</sup>C NMR of 5m**

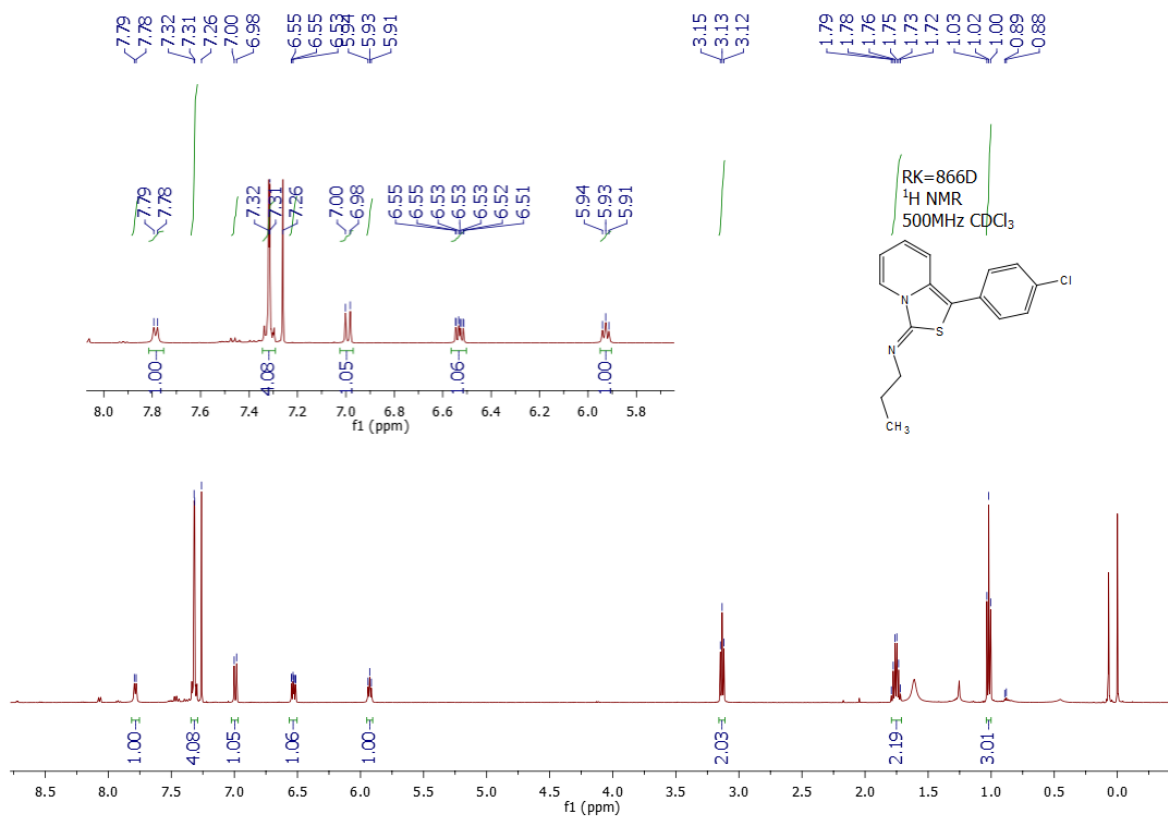

<sup>1</sup>H NMR of **5n**

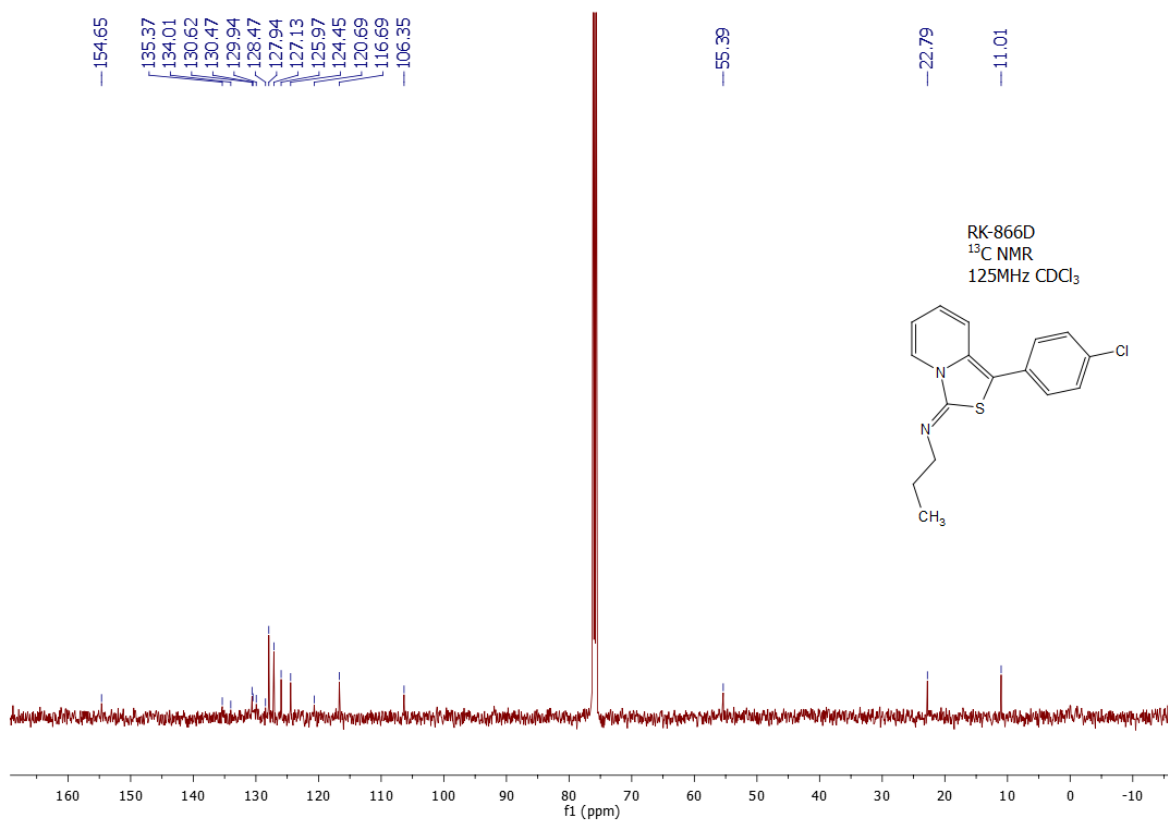

<sup>13</sup>C NMR of **5n**

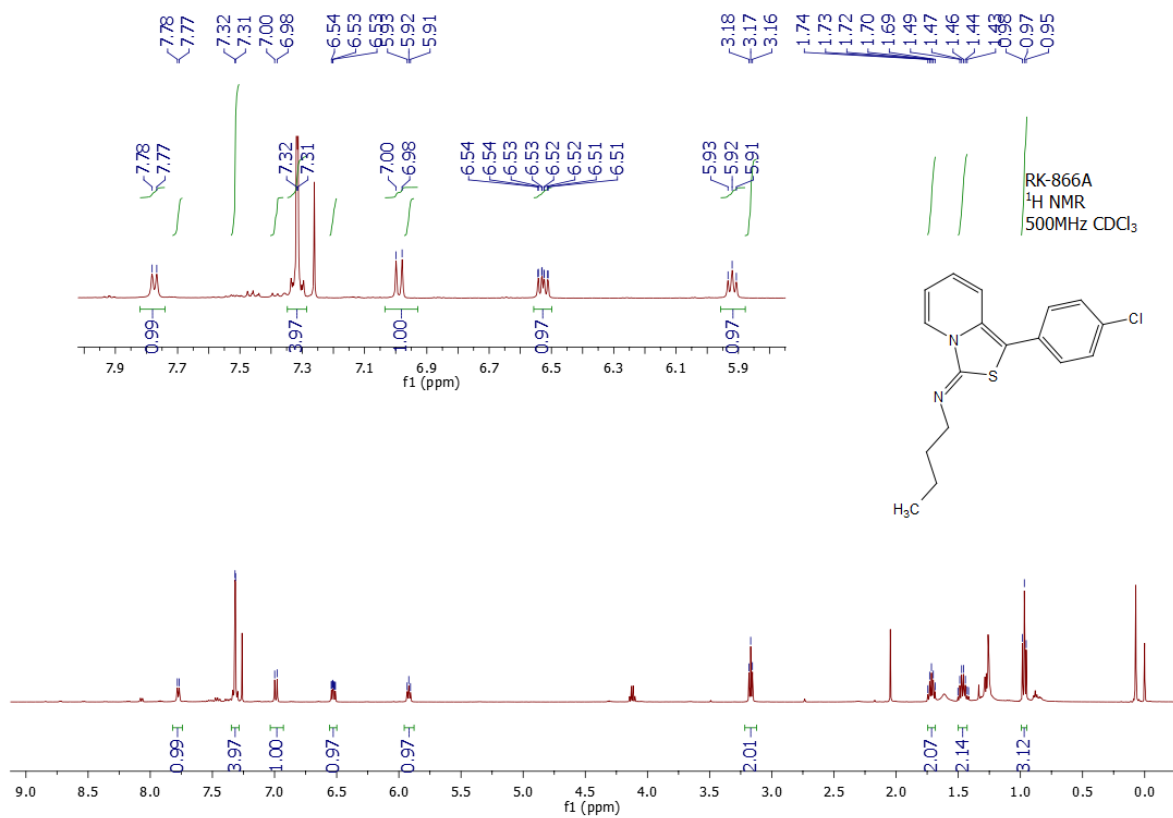

<sup>1</sup>H NMR of **5o**

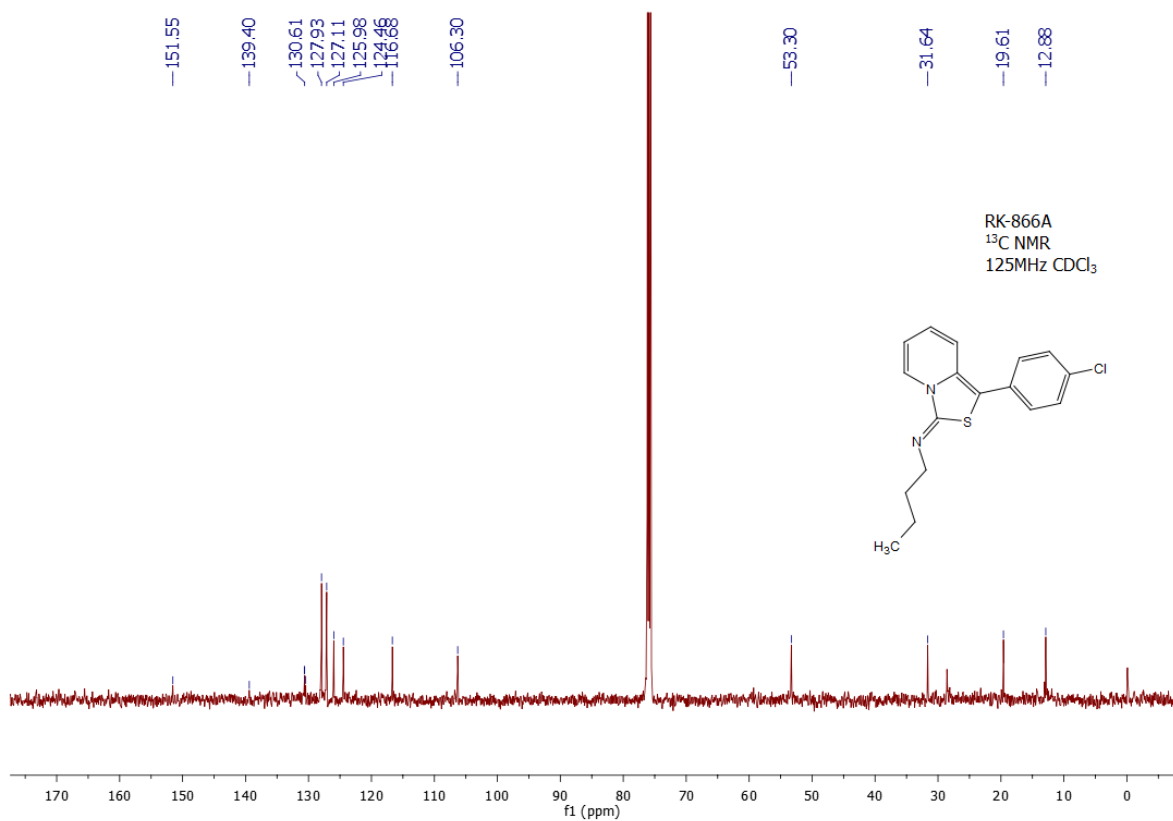

<sup>13</sup>C NMR of **5o**

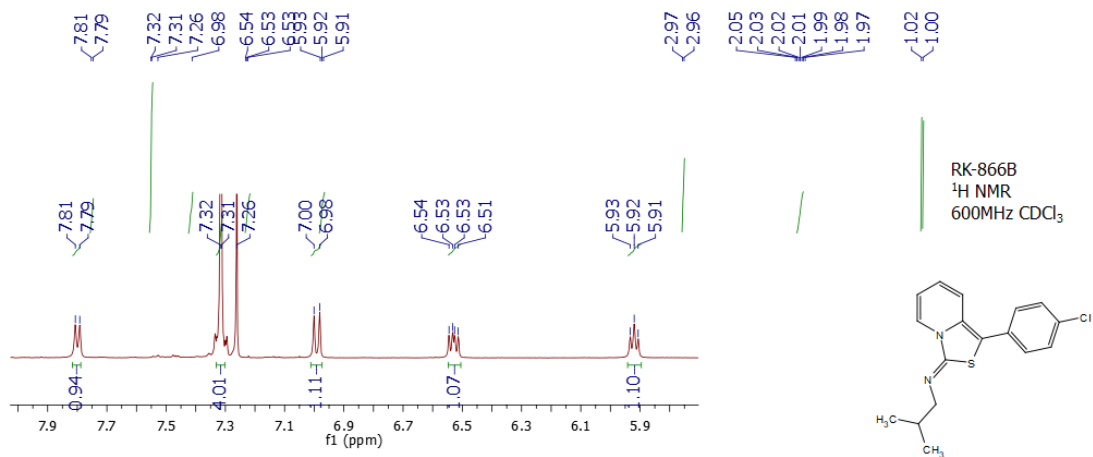

<sup>1</sup>H NMR of **5p**

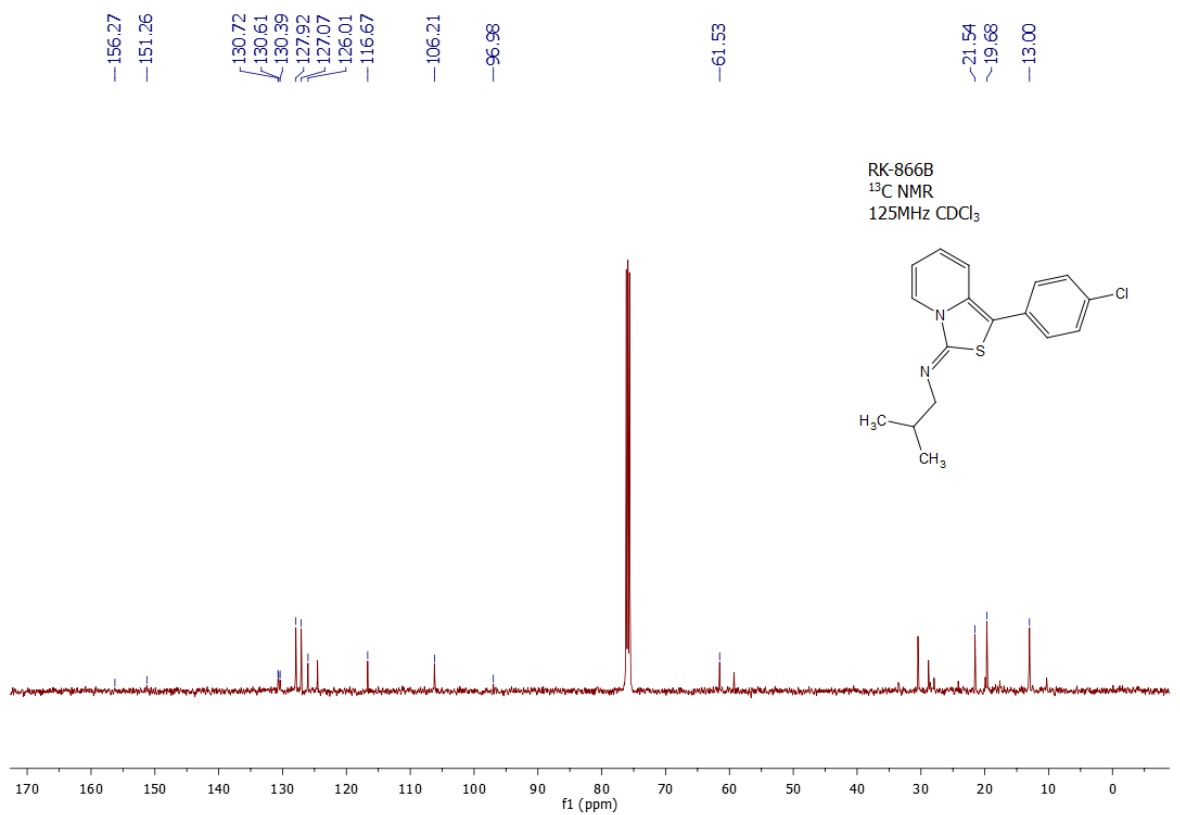

<sup>13</sup>C NMR of **5p**



# Copy of HRMS spectra of compounds

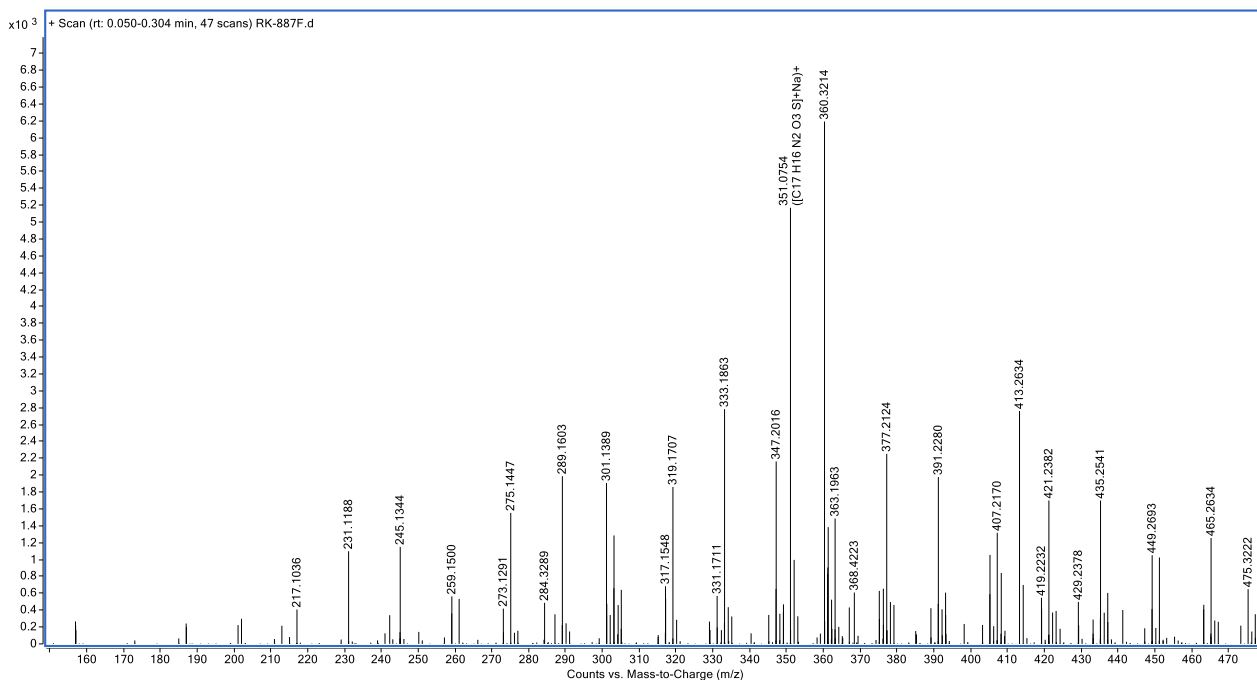

3b

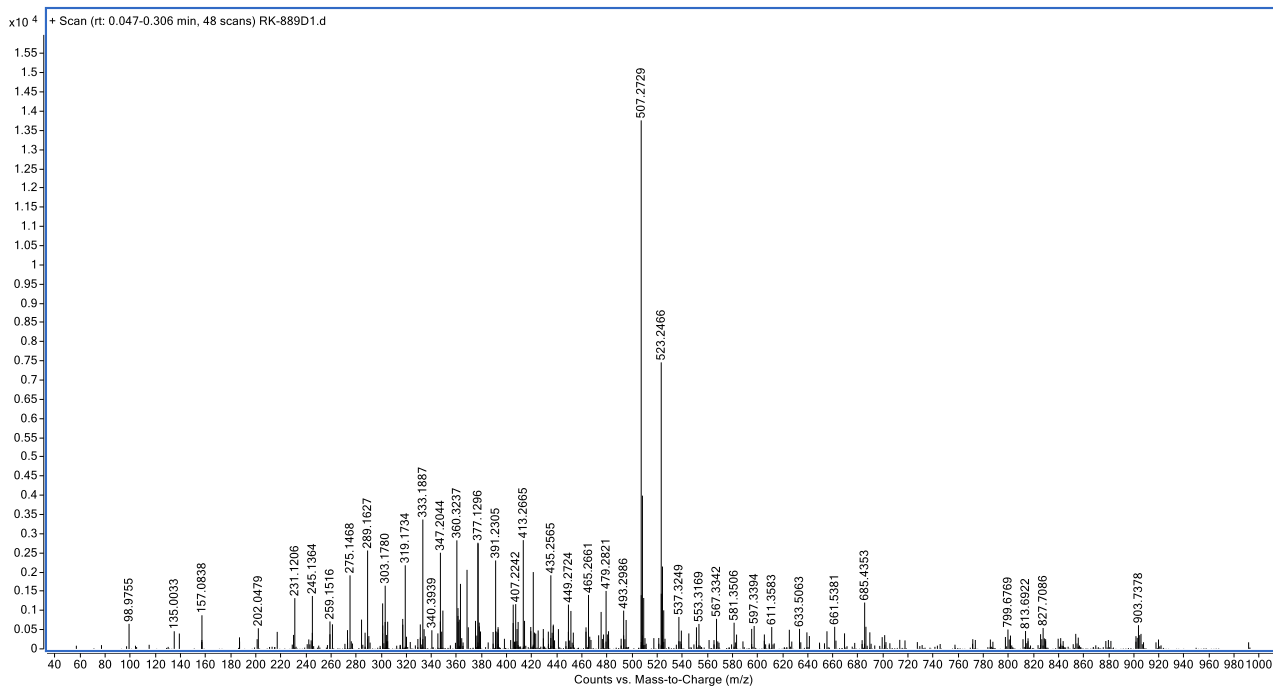

3c

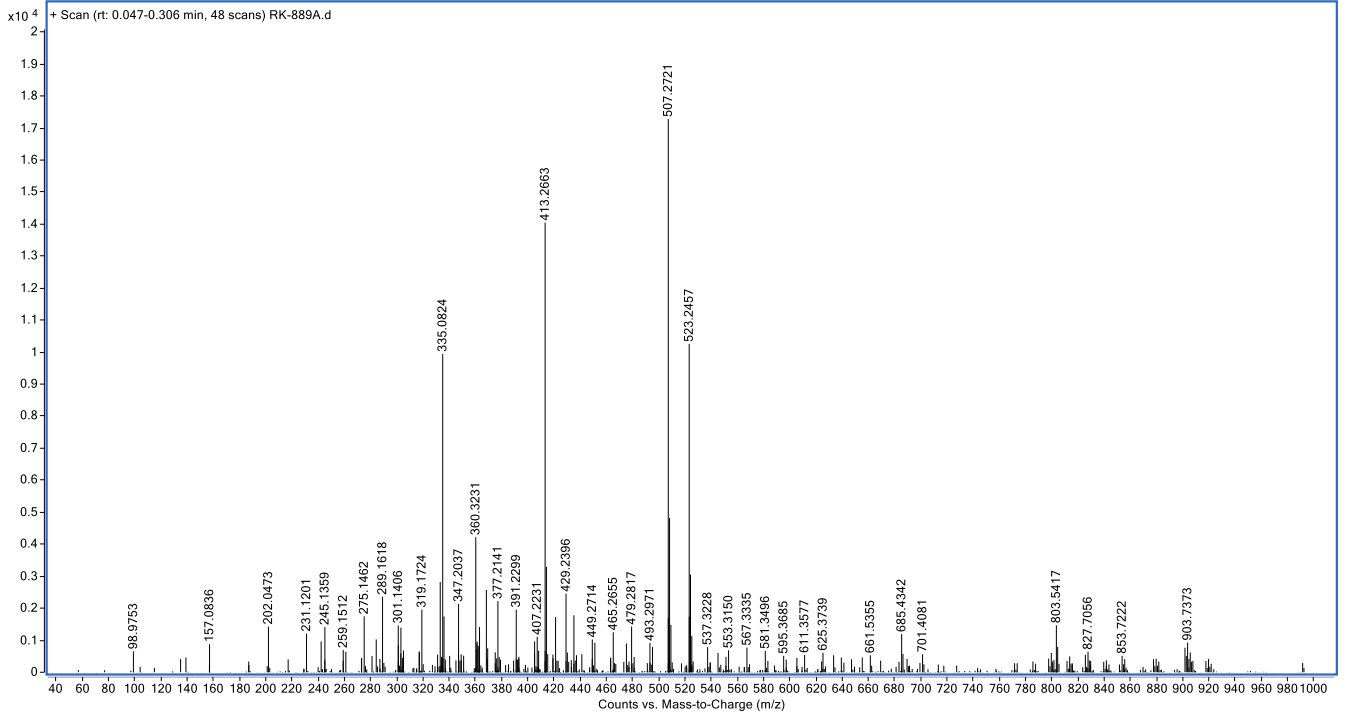

3d

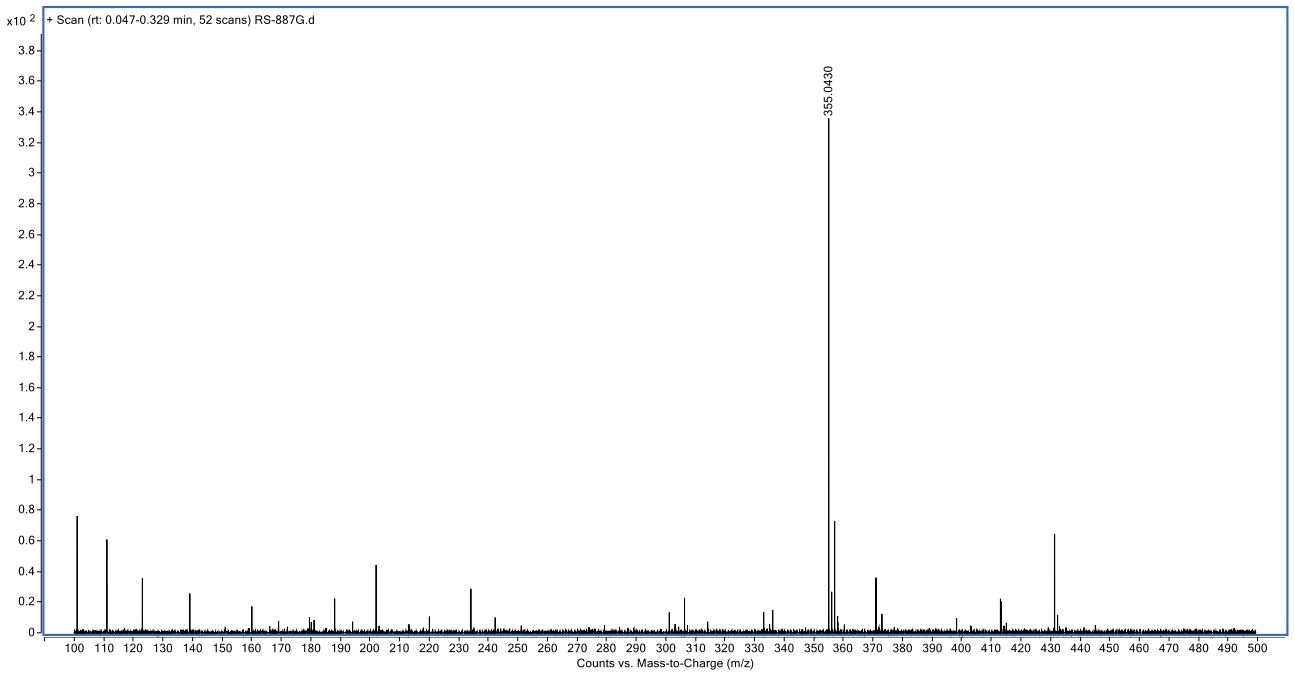

3e

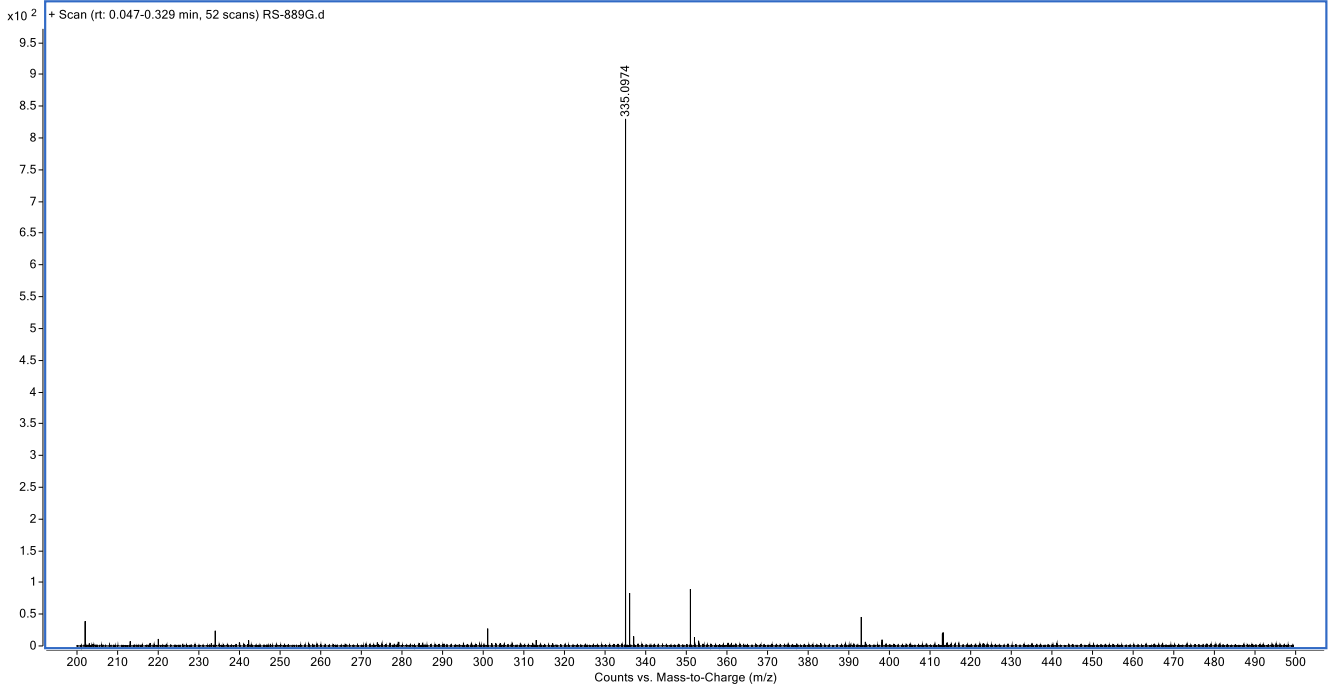

3f

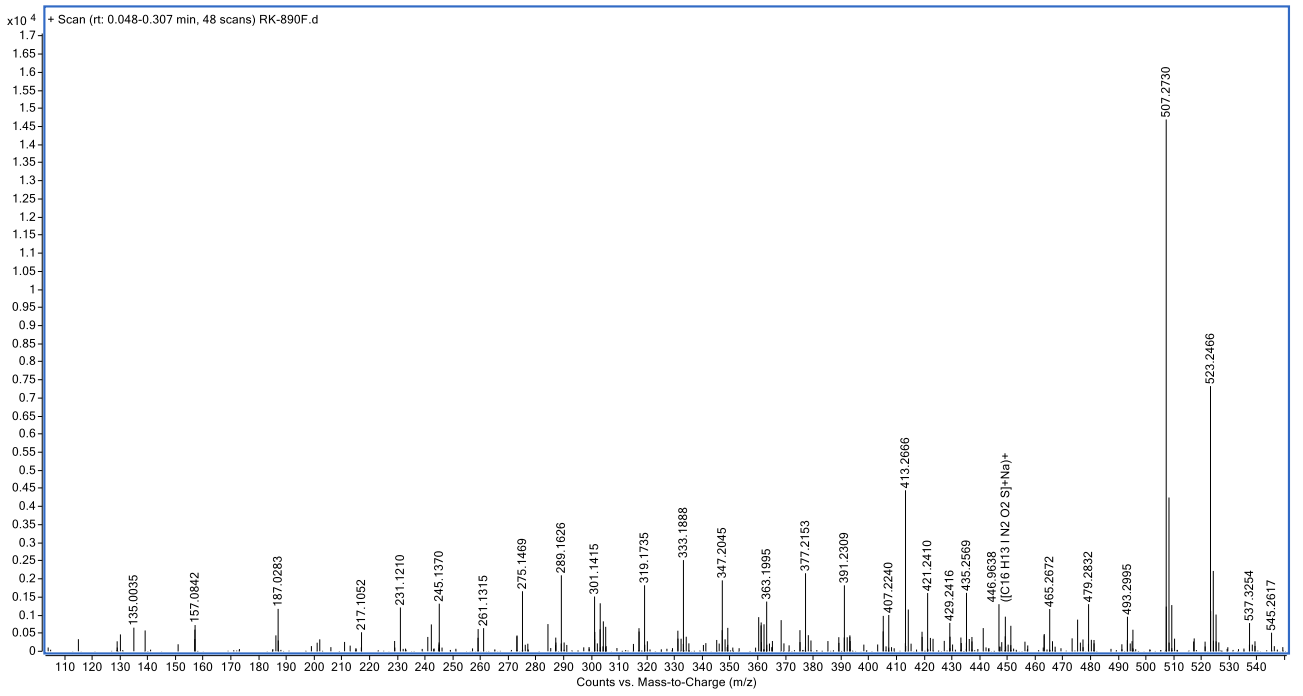

3g

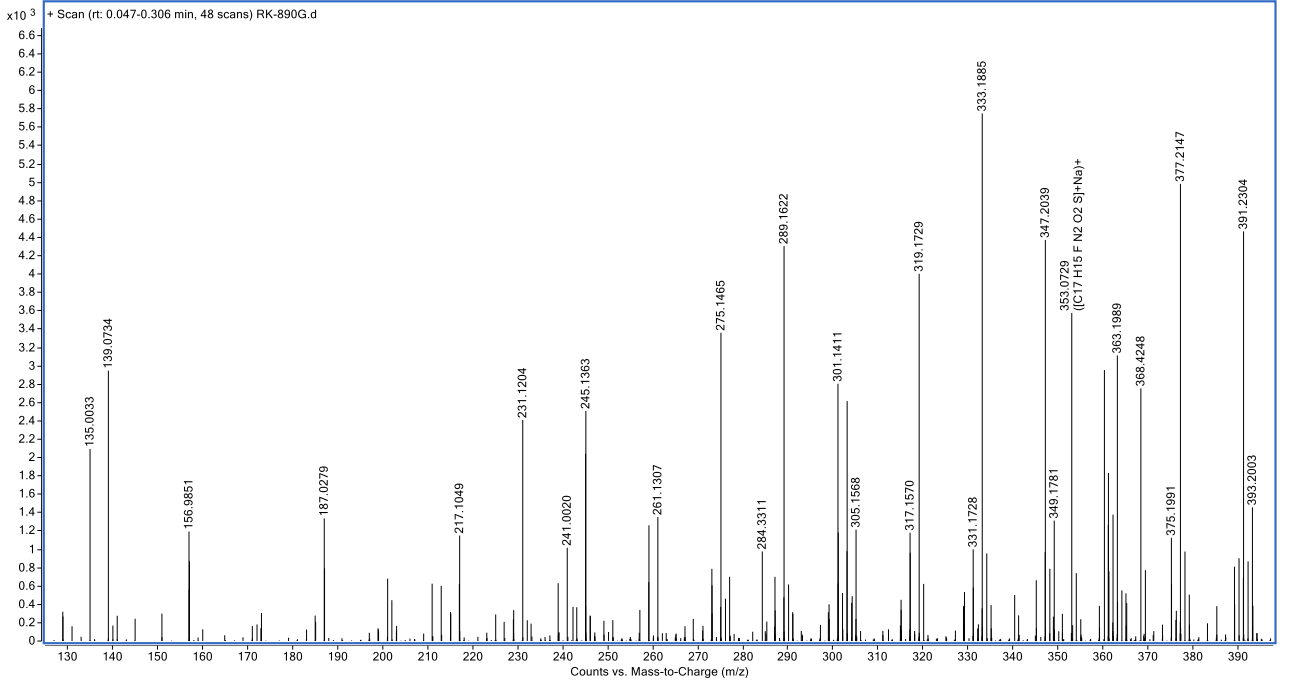

3h

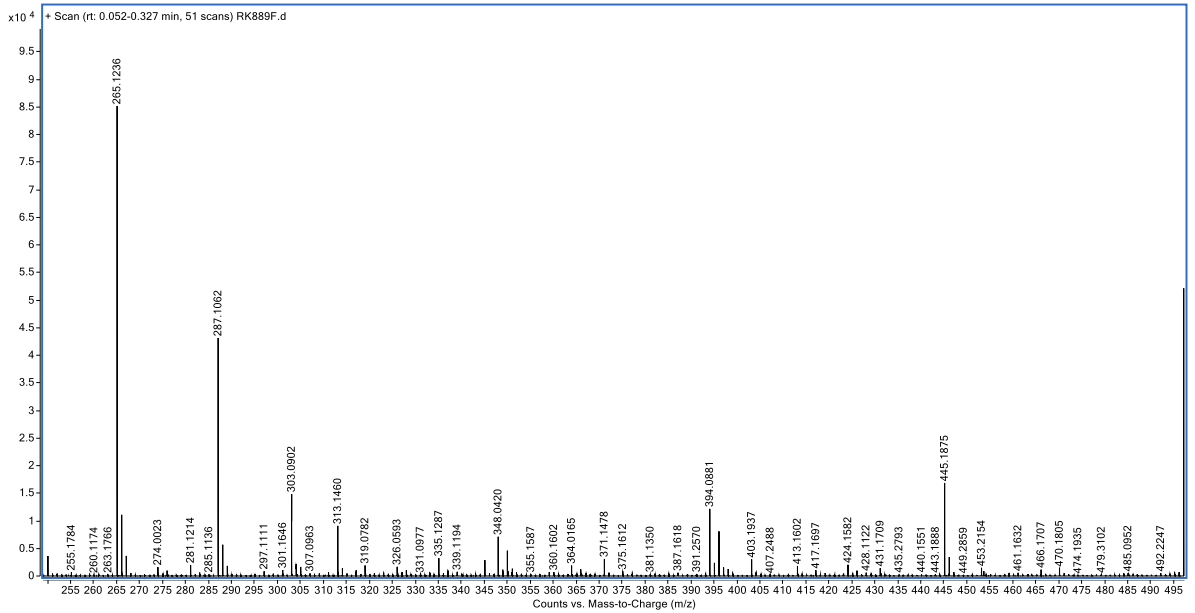

3i

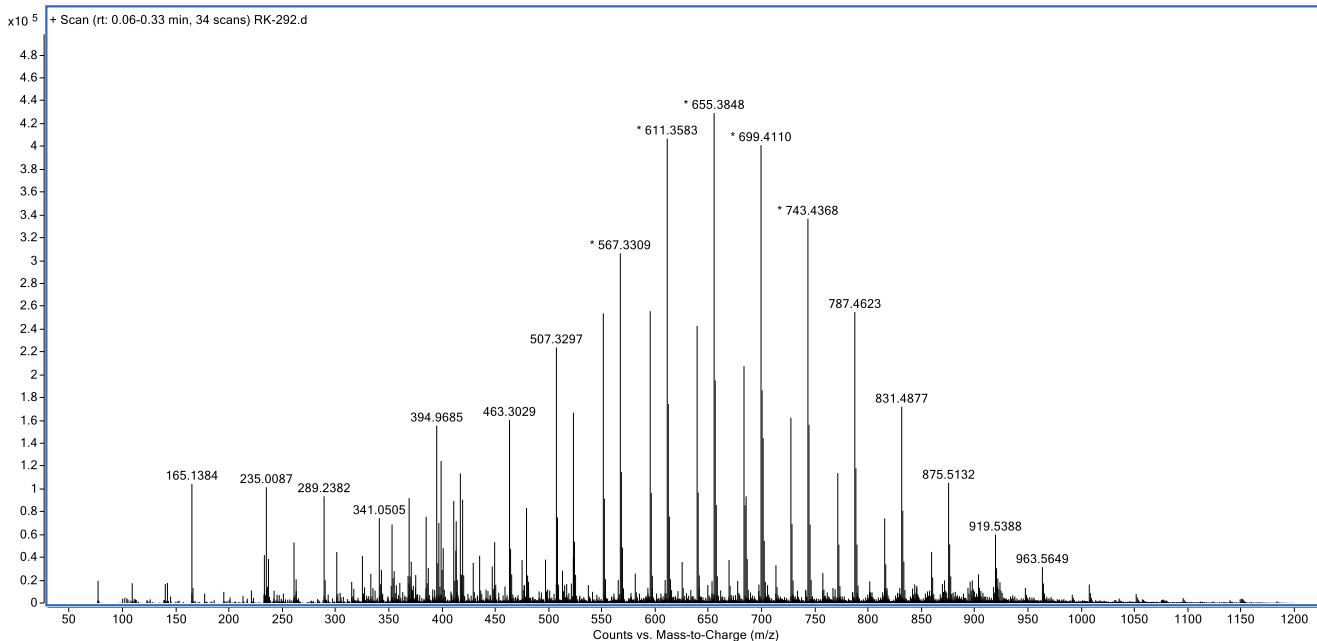

5a

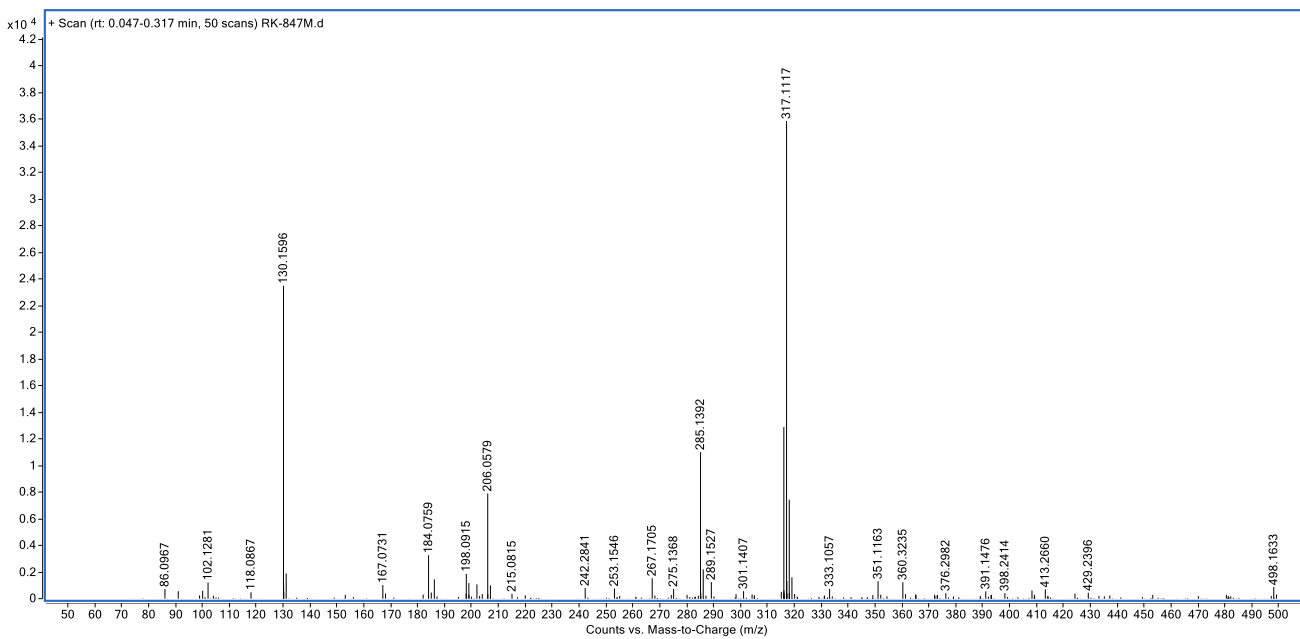

5b

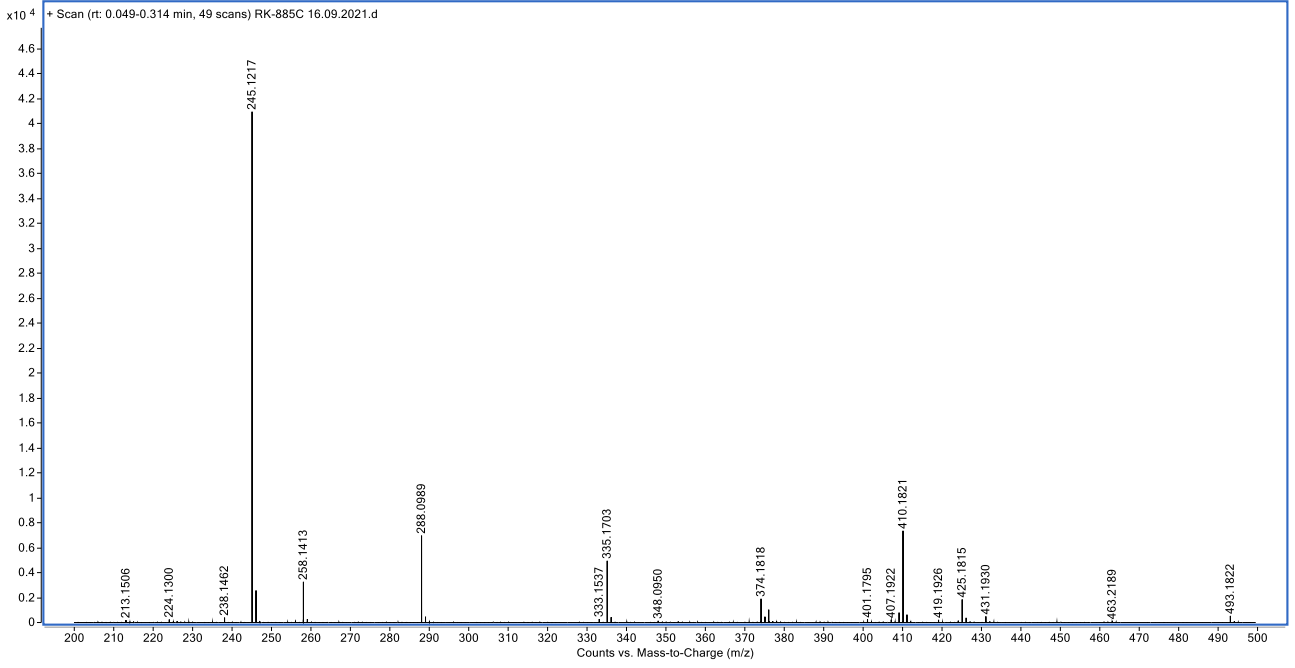

5c

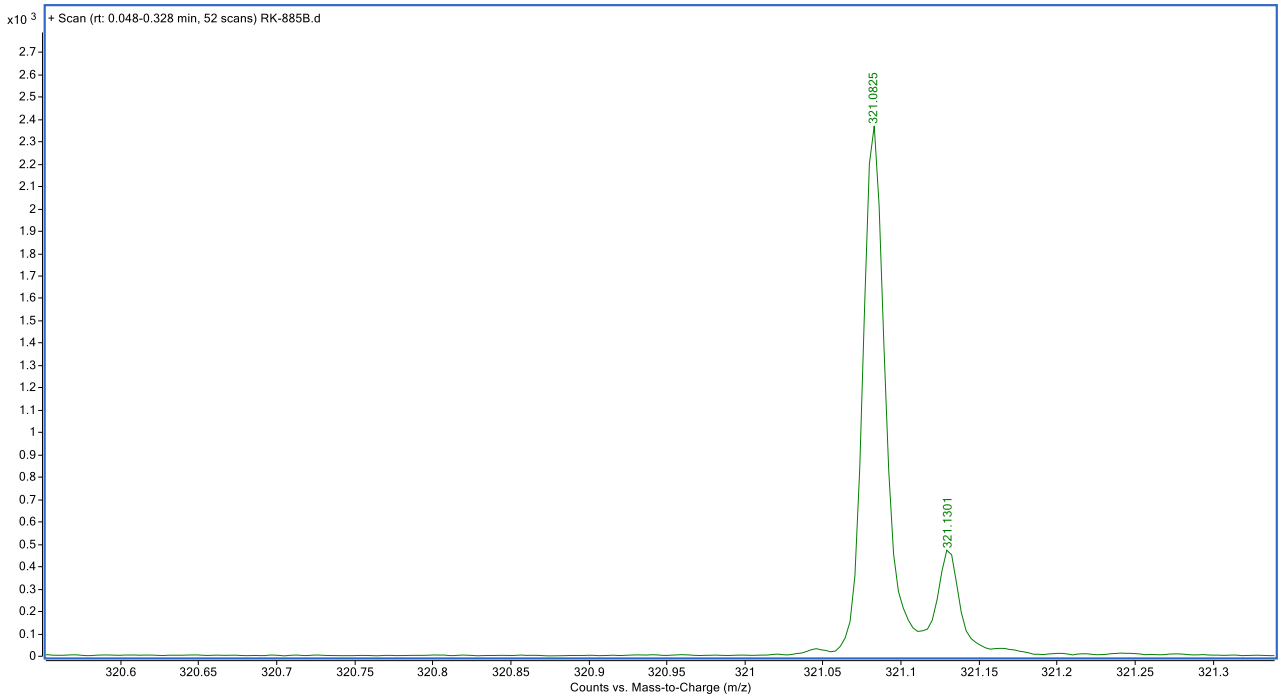

5d

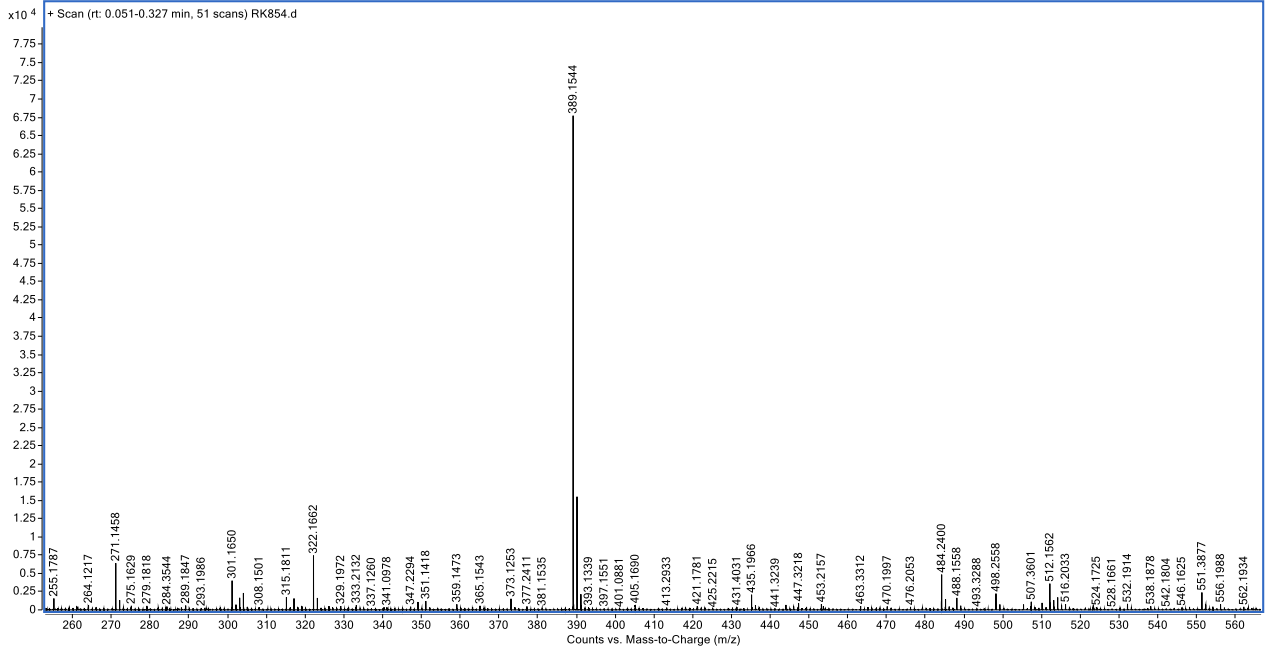

5e

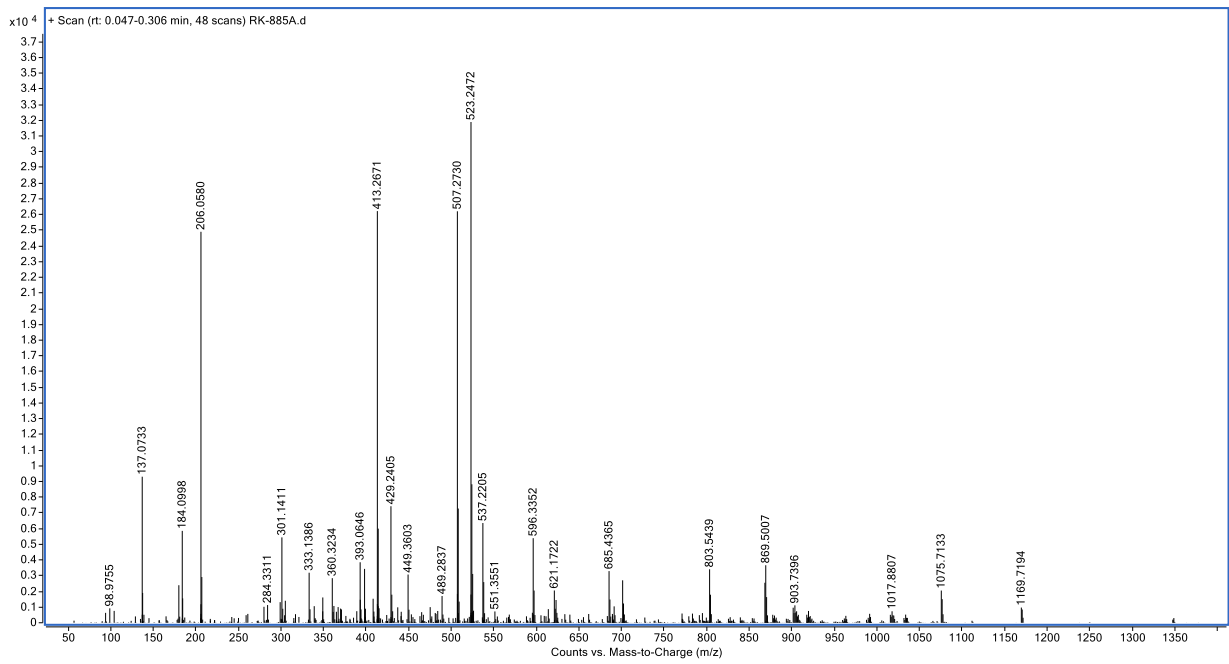

5f

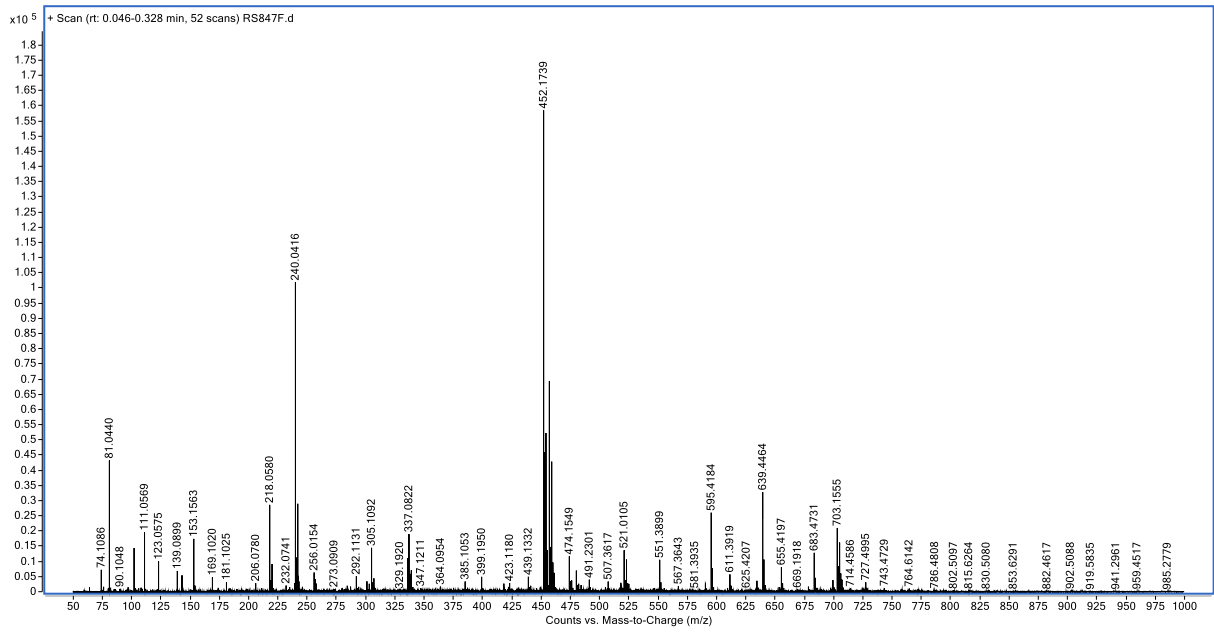

5g

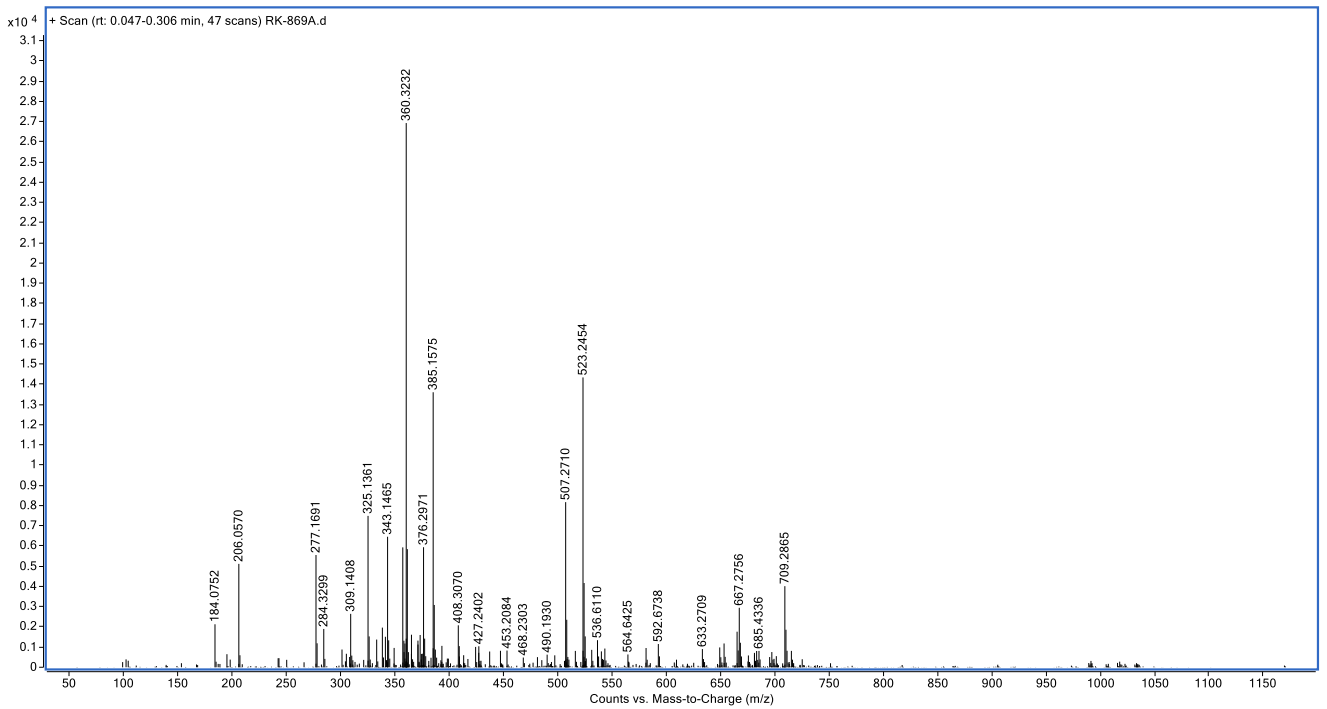

5h



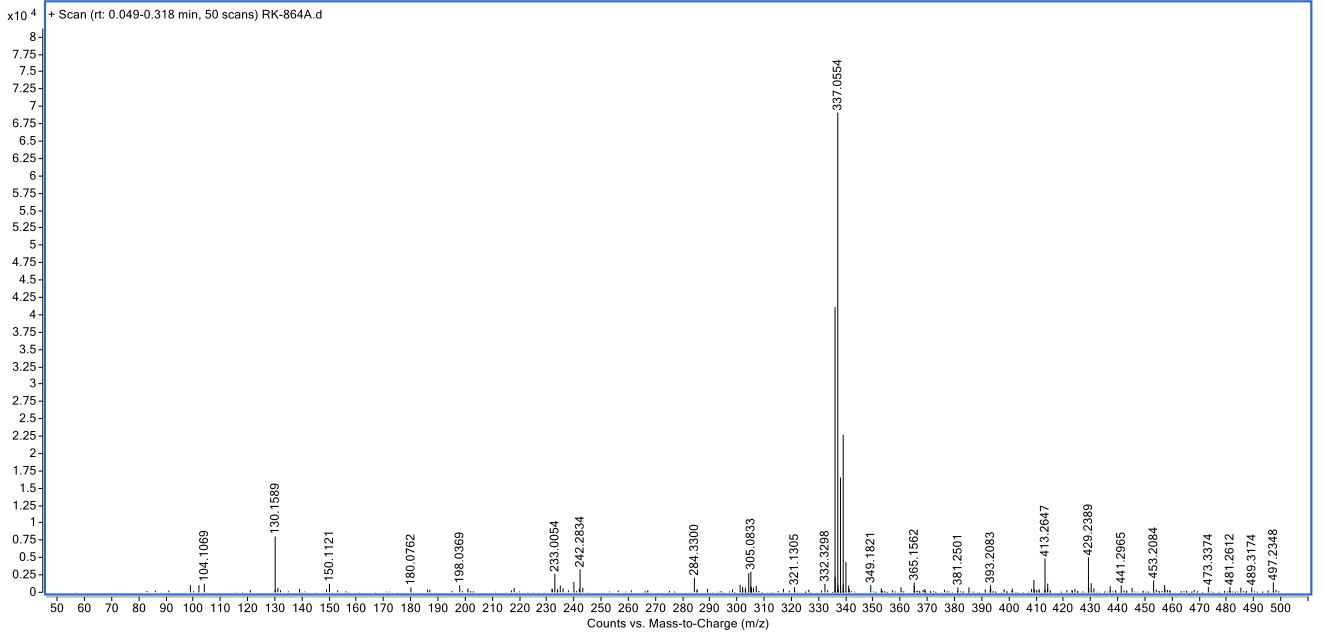

5i

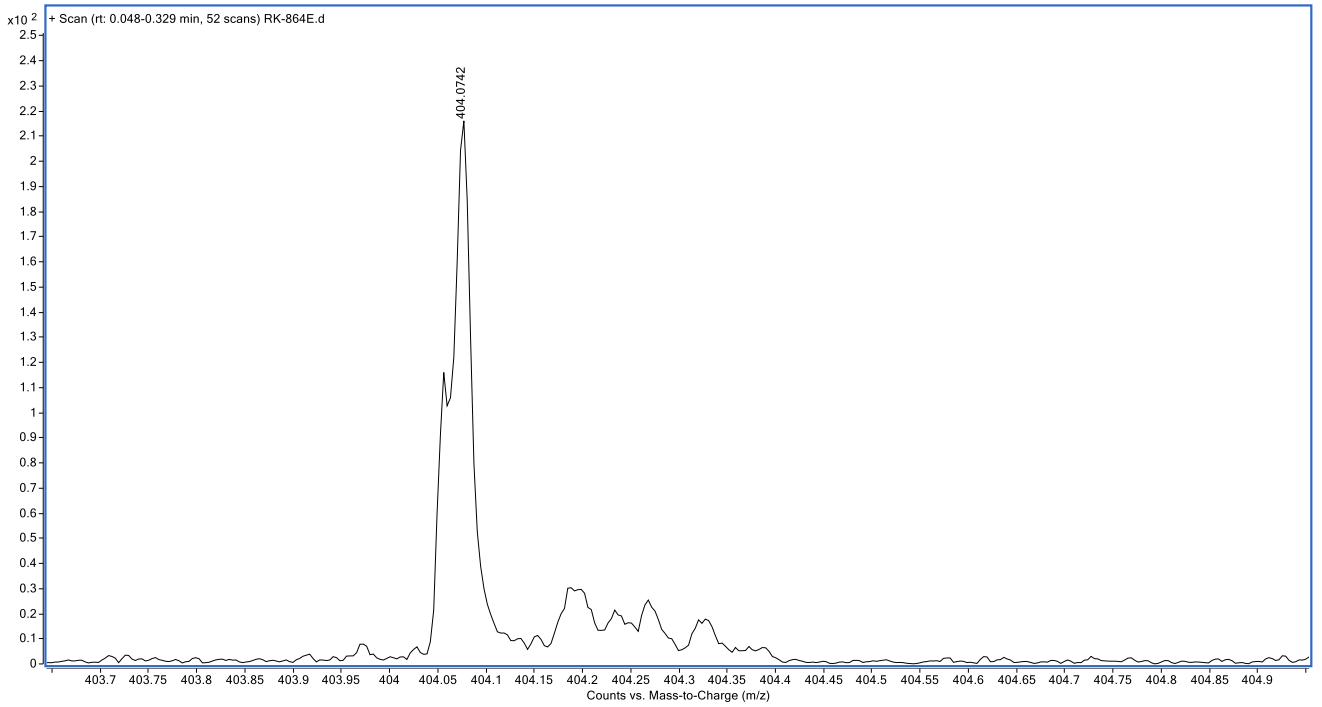

5j

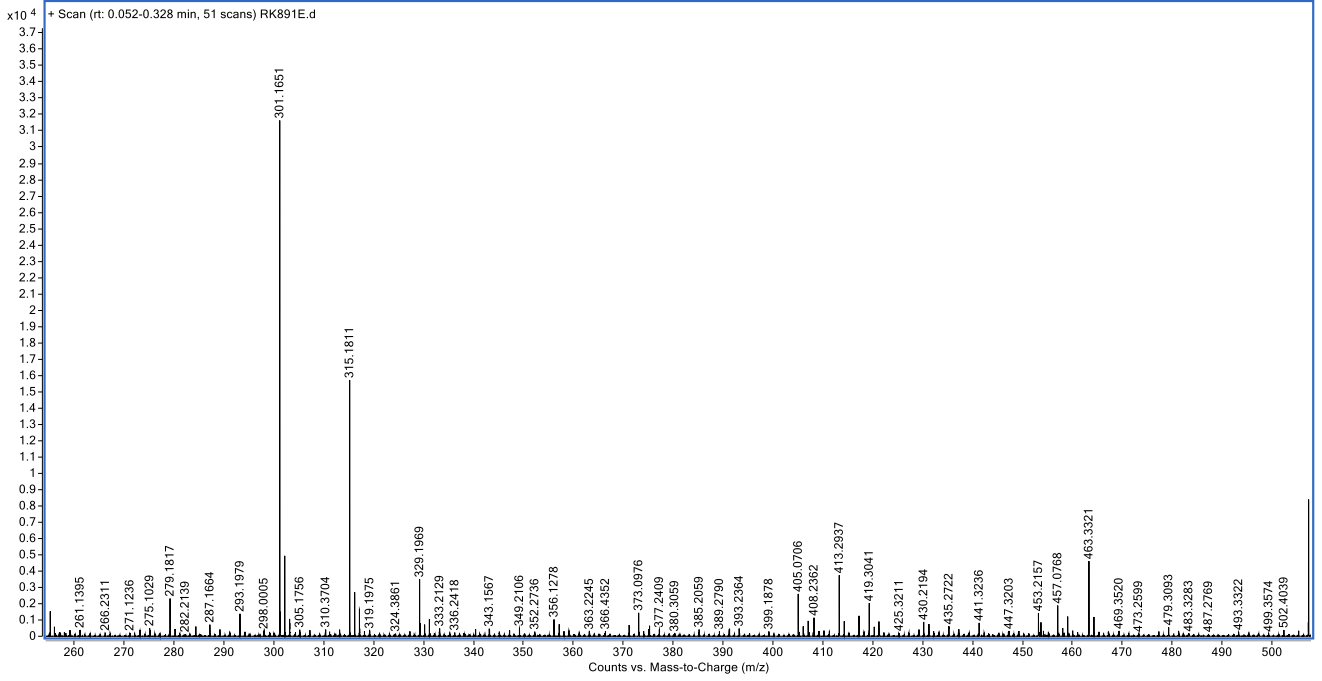

5k

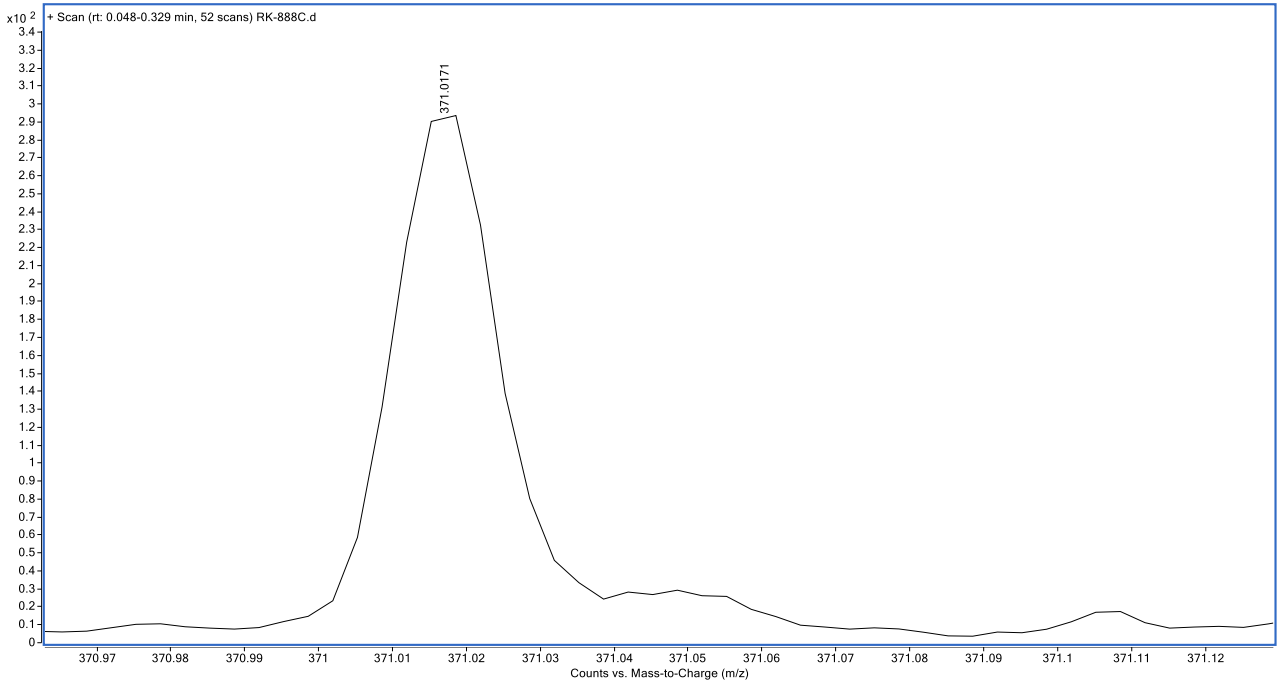

51

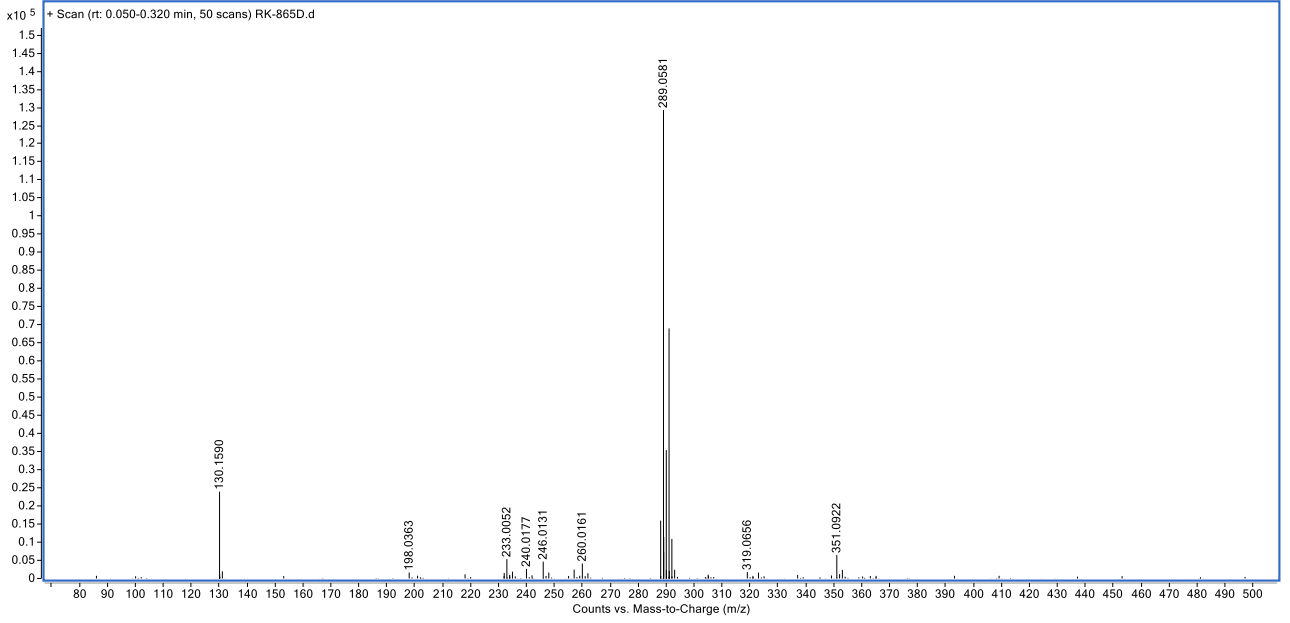

5m

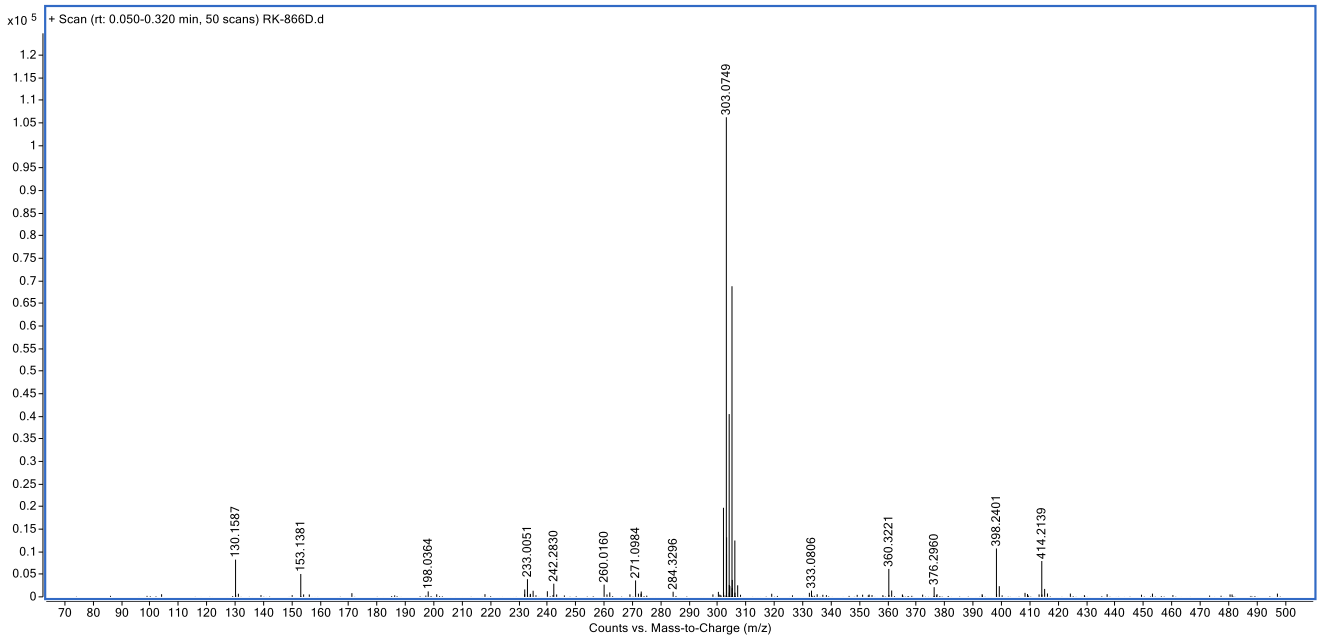

5n

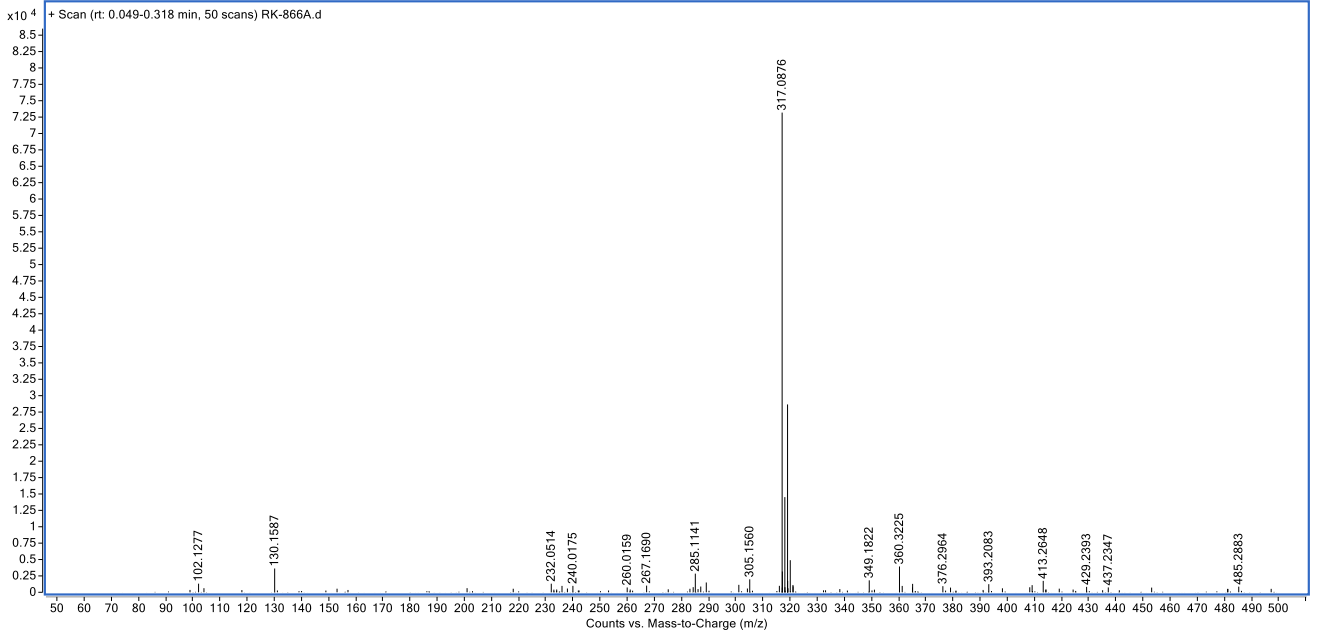

5o

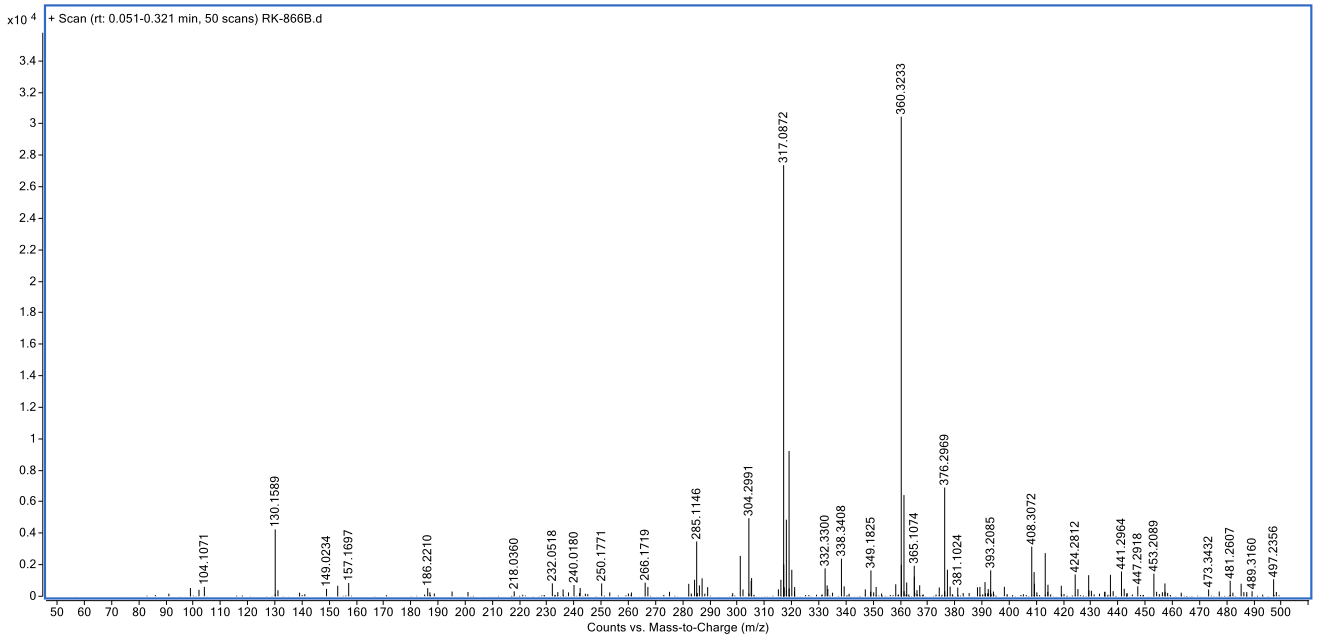

5p
